# Supplementary material for: Liquid crystalline dihydroazulene photoswitches
Source: Royal Society of Chemistry journal article supplement (doi:10.1039/c5ra18649h), 2015-01-01

# Electronic Supplementary Information

## Liquid crystalline dihydroazulene photoswitches

Anne Ugleholdt Petersen,<sup>a</sup> Martyn Jevric,<sup>a</sup> Richard J. Mandle,<sup>b</sup> Edward J. Davis,<sup>b</sup> Stephen J. Cowling,<sup>b</sup> John W. Goodby<sup>b</sup> and Mogens Brøndsted Nielsen<sup>a,\*</sup>

---

a) *Department of Chemistry, University of Copenhagen, Universitetsparken 5, DK-2100 Copenhagen Ø, Denmark. E.mail: mbn@chem.ku.dk.*

b) *Department of Chemistry, University of York, Heslington, York, YO10 5DD, UK.*

|                                                                                             |      |
|---------------------------------------------------------------------------------------------|------|
| Synthesis – Experimentals                                                                   | S5   |
| NMR Spectra                                                                                 | S10  |
| UV-Vis Data                                                                                 | S98  |
| DSC Thermograms                                                                             | S106 |
| Conversion of <b>3g</b> to the corresponding VHF in the nematic phase ( <sup>1</sup> H-NMR) | S108 |

## Synthesis – Experimentals

**4-((5-Bromopentyl)oxy)benzonitrile (7a)**; A mixture consisting of 4-cyanophenol **6** (9.35 g, 78.5 mmol), 1,5-dibromopentane **5a** (27 mL, 198 mmol) and K<sub>2</sub>CO<sub>3</sub> (16.70 g, 121 mmol) in acetone (200 mL) was heated to reflux point for 16 h. The contents of the vessel were allowed to cool to rt and filtered. The solvent was removed from the filtrate and the crude residue was subjected to column chromatography (gradient elution of petroleum spirit to toluene) to afford **7a** (14.92 g, 71%) as a white solid. *R*<sub>f</sub>=0.50 (toluene). M.p. = 54.0-55.9 °C. <sup>1</sup>H NMR (500 MHz, CDCl<sub>3</sub>): δ = 7.57 (d, *J* = 8.8 Hz, 2H), 6.93 (d, *J* = 8.8 Hz, 2H), 4.01 (t, *J* = 6.3 Hz, 2H), 3.44 (t, *J* = 6.7 Hz, 2H), 1.97-1.91 (m, 2H), 1.87–1.81 (m, 2H), 1.67–1.60 (m, 2H) ppm. <sup>13</sup>C NMR (125 MHz, CDCl<sub>3</sub>): δ = 162.4, 134.1, 119.4, 115.3, 104.0, 68.1, 33.6, 32.5, 28.3, 24.8 ppm. MS (ESP +ve): *m/z* = 290 [(M+Na)<sup>+</sup>]. Analysis calcd (%) for C<sub>12</sub>H<sub>14</sub>BrNO (268.15): C 53.75, H 5.26, N 5.22; found: C 53.75, H 4.90, N 5.13.

**4-((6-Bromohexyl)oxy)benzonitrile (7b)**; A mixture consisting of 4-cyanophenol **6** (3.50 g, 29.4 mmol), 1,6-dibromohexane **5b** (10 mL, 65.0 mmol) and K<sub>2</sub>CO<sub>3</sub> (8.51 g, 61.6 mmol) in acetone (200 mL) was heated to reflux point for 16 h. The contents of the vessel were allowed to cool to rt and filtered. The solvent was removed from the filtrate and the crude residue was subjected to column chromatography (gradient elution of petroleum spirit to toluene) to afford **7b** (5.75 g, 69%) as a white solid. *R*<sub>f</sub>=0.50 (toluene). M.p. = 44.0-46.5 °C. <sup>1</sup>H NMR (500 MHz, CDCl<sub>3</sub>): δ = 7.57 (d, *J* = 8.9 Hz, 2H), 6.93 (d, *J* = 8.9 Hz, 2H), 4.00 (t, *J* = 6.4 Hz, 2H), 3.43 (t, *J* = 6.6 Hz, 2H), 1.90 (p, *J* = 6.6 Hz, 2H), 1.82 (p, *J* = 6.6 Hz, 2H), 1.53-1.50 (m, 4H) ppm. <sup>13</sup>C NMR (125 MHz, CDCl<sub>3</sub>): δ = 162.5, 134.1, 119.4, 115.3, 103.9, 68.3, 33.8, 32.7, 29.0, 28.0, 25.3 ppm. MS (ESP +ve): *m/z* = 282 [(M+H)<sup>+</sup>]. Analysis calcd (%) for C<sub>13</sub>H<sub>16</sub>BrNO (282.18): C 55.33, H 5.72, N 4.96; found: C 55.66, H 5.72, N 4.98.

**4-((8-Bromooctyl)oxy)benzonitrile (7c)**; A mixture consisting of 4-cyanophenol **6** (5.49 g, 46.1 mmol), 1,8-dibromooctane **5c** (25.95 g, 95.4 mmol) and K<sub>2</sub>CO<sub>3</sub> (9.40 g, 68.0 mmol) in acetone (200 mL) was heated to reflux point for 16 h. The contents of the vessel were allowed to cool to rt and filtered. The solvent was removed from the filtrate and the crude residue was subjected to column chromatography (gradient elution; petroleum spirit to toluene) to afford **7c** (9.92 g, 69%) as a white solid. *R*<sub>f</sub>=0.50 (toluene). M.p. = 68.5-69.8 °C. <sup>1</sup>H NMR (500 MHz, CDCl<sub>3</sub>): δ = 7.57 (d, *J* = 8.8 Hz, 2H), 6.93 (d, *J* = 8.8 Hz, 2H), 3.99 (t, *J* = 6.5 Hz, 2H), 3.41 (t, *J* = 6.8 Hz, 2H), 1.89-1.84 (m, 2H), 1.82-1.77 (m, 2H), 1.49–1.42 (m, 4H), 1.39-1.33 (m, 4H) ppm. <sup>13</sup>C NMR (125 MHz, CDCl<sub>3</sub>): δ = 162.5, 134.1, 119.4, 115.3, 103.8, 68.5, 34.1, 32.9, 29.2, 29.1, 28.8, 28.2, 26.0 ppm. MS (ESP +ve): *m/z* = 310 [(M+H)<sup>+</sup>]. Analysis calcd (%) for C<sub>15</sub>H<sub>20</sub>BrNO (310.24): C 58.07, H 6.50, N 4.51; found: C 58.26, H 6.53, N 4.51.

**4-((9-Bromononyl)oxy)benzonitrile (7d)**; A mixture consisting of 4-cyanophenol **6** (5.17 g, 43.4 mmol), 1,9-dibromononane **5d** (24.71 g, 86.4 mmol) and K<sub>2</sub>CO<sub>3</sub> (8.97 g, 64.9 mmol) in acetone (200 mL) was heated to reflux point for 16 h. The contents of the vessel were allowed to cool to rt and filtered. The solvent was removed from the filtrate and the crude residue was subjected to column chromatography (gradient elution; petroleum spirit to toluene) to afford **7d** (9.98 g, 71%) as a white solid. *R*<sub>f</sub>=0.50 (toluene). M.p. = 64.1-65.7 °C.

<sup>1</sup>H NMR (500 MHz, CDCl<sub>3</sub>): δ = 7.55 (d, *J* = 8.9 Hz, 2H), 6.91 (d, *J* = 8.9 Hz, 2H), 3.98 (t, *J* = 6.5 Hz, 2H), 3.39 (t, *J* = 6.5 Hz, 2H), 1.86-1.75 (m, 4H), 1.46-1.39 (m, 4H), 1.36-1.29 (m, 6H) ppm. <sup>13</sup>C NMR (125 MHz, CDCl<sub>3</sub>): δ = 162.5, 134.0, 119.4, 115.2, 103.7, 68.4, 34.1, 32.8, 29.3, 29.2, 29.0, 28.7, 28.2, 25.9 ppm. MS (ESP +ve): *m/z* = 324 [(M+H)<sup>+</sup>]. Analysis calcd (%) for C<sub>16</sub>H<sub>22</sub>BrNO (324.26): C 59.27, H 6.84, N 4.32; found: C 59.52, H 6.93, N 4.32.

**4-((10-Bromodecyl)oxy)benzonitrile (7e)**; A mixture consisting of 4-cyanophenol **6** (4.97 g, 41.7 mmol), 1,10-dibromodecane **5e** (30.68 g, 102 mmol) and K<sub>2</sub>CO<sub>3</sub> (9.20 g, 66.6 mmol) in acetone (200 mL) was heated to reflux point for 16 h. The contents of the vessel were allowed to cool to rt and filtered. The solvent was removed from the filtrate and the crude residue was subjected to column chromatography (gradient elution; petroleum spirit to toluene) to afford **7e** (11.00 g, 78%) as a white solid. *R*<sub>f</sub>=0.50 (toluene). M.p. = 73.2-74.7 °C. <sup>1</sup>H NMR (500 MHz, CDCl<sub>3</sub>): δ = 7.57 (d, *J* = 8.9 Hz, 2H), 6.93 (d, *J* = 8.9 Hz, 2H), 3.99 (t, *J* = 6.5 Hz, 2H), 3.41 (t, *J* = 6.8 Hz, 2H), 1.88-1.77 (m, 4H), 1.48-1.40 (m, 4H), 1.36-1.28 (m, 8H) ppm. <sup>13</sup>C NMR (125 MHz, CDCl<sub>3</sub>): δ = 162.6, 134.1, 119.5, 115.3, 103.8, 68.5, 34.2, 32.9, 29.5, 29.5, 29.4, 29.1, 28.9, 28.3, 26.1 ppm. MS (ESP +ve): *m/z* = 360 [(M+Na)<sup>+</sup>]. Analysis calcd (%) for C<sub>17</sub>H<sub>24</sub>BrNO (338.29): C 60.36, H 7.15, N 4.14; found: C 60.53, H 7.19, N 4.15.

**4-((5-(4-Acetylphenoxy)pentyl)oxy)benzonitrile (9a)**; A mixture consisting of 4-hydroxyacetophenone **8** (2.69 g, 19.8 mmol), **7a** (4.48 g, 16.7 mmol) and K<sub>2</sub>CO<sub>3</sub> (2.98 g, 21.6 mmol) in acetone (100 mL) was heated to reflux point for 24 h. The contents of the vessel were allowed to cool to rt, diluted with CH<sub>2</sub>Cl<sub>2</sub> (200 mL) and filtered. The solvent was removed from the filtrate and the crude residue was passed through a short SiO<sub>2</sub> column (CH<sub>2</sub>Cl<sub>2</sub>) to afford **9a** (4.42 g, 82%) as a white solid. *R*<sub>f</sub>=0.39. M.p. = 100.8-102.8 °C. <sup>1</sup>H NMR (500 MHz, CDCl<sub>3</sub>): δ = 7.96 (d, *J* = 8.9 Hz, 2H), 7.60 (d, *J* = 8.9 Hz, 2H), 6.93 (d, *J* = 8.9 Hz, 2H), 6.92 (d, *J* = 8.9 Hz, 2H), 4.06 (t, *J* = 6.2 Hz, 2H), 4.04 (t, *J* = 6.3 Hz, 2H), 2.55 (s, 3H), 1.92-1.87 (m, 4H), 1.70-1.64 (m, 2H) ppm. <sup>13</sup>C NMR (125 MHz, CDCl<sub>3</sub>): δ = 196.9, 163.0, 162.4, 134.1, 130.7, 130.4, 119.4, 115.3, 114.2, 104.0, 68.2, 68.0, 29.0, 28.9, 26.5, 22.8 ppm. HRMS (MALDI +ve) calcd for C<sub>20</sub>H<sub>22</sub>NO<sub>3</sub> [(M+H)<sup>+</sup>]: *m/z* = 324.1594; exp 324.1595. Analysis calcd (%) for C<sub>20</sub>H<sub>21</sub>NO<sub>3</sub> (323.39): C 74.28, H 6.55, N 4.33; found: C 74.09, H 6.28, N 4.27.

**4-((6-(4-Acetylphenoxy)hexyl)oxy)benzonitrile (9b)**; A mixture consisting of 4-hydroxyacetophenone **8** (2.26 g, 16.6 mmol), **7b** (4.00 g, 14.2 mmol) and K<sub>2</sub>CO<sub>3</sub> (4.27 g, 30.9 mmol) in acetone (100 mL) was heated to reflux point for 24 h. The contents of the vessel were allowed to cool to rt, diluted with CH<sub>2</sub>Cl<sub>2</sub> (200 mL) and filtered. The solvent was removed from the filtrate and the crude residue was passed through a short SiO<sub>2</sub> column (CH<sub>2</sub>Cl<sub>2</sub>) to afford **9b** (4.26 g, 89%) as a white solid. *R*<sub>f</sub>=0.33. M.p. = 99.5-101.3 °C. <sup>1</sup>H NMR (500 MHz, CDCl<sub>3</sub>): δ = 7.92 (d, *J* = 8.9 Hz, 2H), 7.57 (d, *J* = 8.9 Hz, 2H), 6.93 (d, *J* = 8.9 Hz, 2H), 6.91 (d, *J* = 8.9 Hz, 2H), 4.04 (t, *J* = 6.4 Hz, 2H), 4.02 (t, *J* = 6.4 Hz, 2H), 2.55 (s, 3H), 1.87-1.82 (m, 4H), 1.57-1.55 (m, 4H) ppm. <sup>13</sup>C NMR (125 MHz, CDCl<sub>3</sub>): δ = 196.9, 163.1, 162.5, 134.1, 130.7, 130.4, 119.4, 115.3, 114.2, 103.9, 68.3, 68.1, 29.2, 29.1, 26.5, 25.9, 25.9 ppm. HRMS (MALDI +ve) calcd for C<sub>21</sub>H<sub>24</sub>NO<sub>3</sub> [(M+H)<sup>+</sup>]: *m/z* = 338.1751; exp 338.1751. Analysis calcd (%) for C<sub>21</sub>H<sub>23</sub>NO<sub>3</sub> (337.42): C 74.75, H 6.87, N 4.15; found: C 74.60, H 6.73, N 3.99.

**4-((8-(4-Acetylphenoxy)octyl)oxy)benzonitrile (9c);** A mixture consisting of 4-hydroxyacetophenone **8** (2.61 g, 19.2 mmol), **7c** (4.94 g, 15.9 mmol) and K<sub>2</sub>CO<sub>3</sub> (4.75 g, 34.4 mmol) in acetone (100 mL) was heated to reflux point for 24 h. The contents of the vessel were allowed to cool to rt, diluted with CH<sub>2</sub>Cl<sub>2</sub> (200 mL) and filtered. The solvent was removed from the filtrate and the crude residue was passed through a short SiO<sub>2</sub> column (CH<sub>2</sub>Cl<sub>2</sub>) to afford **9c** (3.64 g, 63%) as a white solid. *R*<sub>f</sub>=0.35. M.p. = 91.1-92.3 °C. <sup>1</sup>H NMR (500 MHz, CDCl<sub>3</sub>): δ = 7.92 (d, *J* = 8.9 Hz, 2H), 7.56 (d, *J* = 8.8 Hz, 2H), 6.92 (d, *J* = 8.9 Hz, 2H), 6.91 (d, *J* = 8.8 Hz, 2H), 4.02 (t, *J* = 6.5 Hz, 2H), 3.99 (d, *J* = 6.5 Hz, 2H), 2.55 (s, 3H), 1.84-1.78 (m, 4H), 1.50-1.45 (m, 4H), 1.41-1.38 (m, 4H) ppm. <sup>13</sup>C NMR (125 MHz, CDCl<sub>3</sub>): δ = 196.9, 163.2, 162.5, 134.1, 130.7, 130.3, 119.4, 115.3, 114.2, 103.8, 68.5, 68.3, 29.4, 29.4, 29.2, 29.1, 26.5, 26.1, 26.0 ppm. HRMS (MALDI +ve) calcd for C<sub>23</sub>H<sub>28</sub>NO<sub>3</sub>Na ([M+Na]<sup>+</sup>): *m/z* = 388.1883; exp 388.1884. Analysis calcd (%) for C<sub>23</sub>H<sub>27</sub>NO<sub>3</sub> (365.47): C 75.59, H 7.45, N 3.83; found: C 75.51, H 7.28, N 3.78.

**4-((9-(4-Acetylphenoxy)nonyl)oxy)benzonitrile (9d);** A mixture consisting of 4-hydroxyacetophenone **8** (2.47 g, 18.1 mmol), **7d** (4.96 g, 15.3 mmol) and K<sub>2</sub>CO<sub>3</sub> (5.20 g, 37.6 mmol) in acetone (100 mL) was heated to reflux point for 24 h. The contents of the vessel were allowed to cool to rt, diluted with CH<sub>2</sub>Cl<sub>2</sub> (200 mL) and filtered. The solvent was removed from the filtrate and the crude residue was passed through a short SiO<sub>2</sub> column (CH<sub>2</sub>Cl<sub>2</sub>) to afford **9d** (5.54 g, 95%) as a white solid. *R*<sub>f</sub>=0.35. M.p. = 86.4-87.2 °C. <sup>1</sup>H NMR (500 MHz, CDCl<sub>3</sub>): δ = 7.92 (d, *J* = 8.6 Hz, 2H), 7.57 (d, *J* = 8.6 Hz, 2H), 6.93 (d, *J* = 8.6 Hz, 2H), 6.91 (d, *J* = 8.6 Hz, 2H), 4.02 (t, *J* = 6.5 Hz, 2H), 3.99 (t, *J* = 6.5 Hz, 2H), 2.55 (s, 3H), 1.83-1.77 (m, 4H), 1.49-1.43 (m, 4H), 1.39-1.35 (m, 6H) ppm. <sup>13</sup>C NMR (125 MHz, CDCl<sub>3</sub>): δ = 196.9, 163.2, 162.6, 134.1, 130.7, 130.3, 119.5, 115.3, 114.3, 103.8, 68.5, 68.3, 29.6, 29.4, 29.4, 29.2, 29.1, 26.5, 26.1, 26.1 ppm. HRMS (MALDI +ve) calcd for C<sub>24</sub>H<sub>30</sub>N<sub>3</sub>O<sub>2</sub> ([M+H]<sup>+</sup>): *m/z* = 380.2220; exp 380.2221. Analysis calcd (%) for C<sub>24</sub>H<sub>29</sub>NO<sub>3</sub> (379.50): C 75.96, H 7.70, N 3.69; found: C 75.82, H 7.68, N 3.55.

**4-((10-(4-Acetylphenoxy)decyl)oxy)benzonitrile (9e);** A mixture consisting of 4-hydroxyacetophenone **8** (2.51 g, 18.4 mmol), **7e** (5.16 g, 15.3 mmol) and K<sub>2</sub>CO<sub>3</sub> (5.10 g, 36.9 mmol) in acetone (100 mL) was heated to reflux point for 24 h. The contents of the vessel were allowed to cool to rt, diluted with CH<sub>2</sub>Cl<sub>2</sub> (200 mL) and filtered. The solvent was removed from the filtrate and the crude residue was passed through a short SiO<sub>2</sub> column (CH<sub>2</sub>Cl<sub>2</sub>) to afford **9e** (5.12 g, 85%) as a white solid. *R*<sub>f</sub>=0.40. M.p. = 71.5-73.5 °C. <sup>1</sup>H NMR (500 MHz, CDCl<sub>3</sub>): δ = 7.92 (d, *J* = 8.8 Hz, 2H), 7.56 (d, *J* = 8.8 Hz, 2H), 6.92 (d, *J* = 8.8 Hz, 2H), 6.91 (d, *J* = 8.8 Hz, 2H), 4.01 (t, *J* = 6.5 Hz, 2H), 3.99 (d, *J* = 6.5 Hz, 2H), 2.55 (s, 3H), 1.83-1.76 (m, 4H), 1.48-1.42 (m, 4H), 1.37-1.32 (m, 8H) ppm. <sup>13</sup>C NMR (125 MHz, CDCl<sub>3</sub>): δ = 196.9, 163.2, 162.6, 134.1, 130.7, 130.3, 119.4, 115.3, 114.2, 103.8, 68.5, 68.4, 29.6, 29.4, 29.4, 29.2, 29.1, 26.5, 26.1, 26.1 ppm, 1C masked. HRMS (MALDI +ve) calcd for C<sub>25</sub>H<sub>32</sub>NO<sub>3</sub> ([M+H]<sup>+</sup>): *m/z* = 394.2377; exp 394.2377. Analysis calcd (%) for C<sub>25</sub>H<sub>31</sub>NO<sub>3</sub> (393.53): C 76.30, H 7.94, N 3.56; found: C 76.29, H 7.90, N 3.52.

**2-(1-(4-((5-(4-Cyanophenoxy)pentyl)oxy)phenyl)ethylidene)malononitrile (13a);** A biphasic mixture of **9a** (2.27 g, 7.02 mmol), malononitrile (1.66 g, 25.1 mmol), NH<sub>4</sub>OAc (2.20 g, 28.5 mmol) in toluene (100 mL) and AcOH (4 mL) was heated using a Dean-Stark

apparatus for 3 h. The vessel was cooled, diluted with toluene (100 mL) and decanted into a separatory funnel and water (100 mL) was added. The phases were separated and the organic phase washed with water (3 x 100 mL) and brine (100 mL). The organic phase was dried over  $\text{MgSO}_4$ , filtered and the solvent removed in vacuo. The residue was recrystallized from  $\text{CH}_2\text{Cl}_2/\text{MeOH}$  to give **13a** (2.02 g, 77%), as a yellowish solid.  $R_f=0.65$  ( $\text{CH}_2\text{Cl}_2$ ). M.p. = 83.2-84.9, 95.6-100.3 °C.  $^1\text{H}$  NMR (500 MHz,  $\text{CDCl}_3$ ):  $\delta$  = 7.60 (d,  $J$  = 8.9 Hz, 2H), 7.57 (d,  $J$  = 8.9 Hz, 2H) 6.97 (d,  $J$  = 8.9 Hz, 2H), 6.94 (d,  $J$  = 8.9 Hz, 2H), 4.06 (t,  $J$  = 6.2 Hz, 2H), 4.04 (t,  $J$  = 6.2 Hz, 2H), 2.61 (s, 3H), 1.92-1.87 (m, 4H), 1.70-1.64 (m, 2H) ppm.  $^{13}\text{C}$  NMR (125 MHz,  $\text{CDCl}_3$ ):  $\delta$  = 174.1, 162.7, 162.4, 134.1, 130.0, 127.9, 119.4, 115.3, 115.0, 113.8, 113.5, 104.0, 82.0, 68.2, 28.9, 28.8, 23.9, 22.8 ppm, 1C masked. HRMS (MALDI +ve) calcd for  $\text{C}_{23}\text{H}_{22}\text{N}_3\text{O}_2$  ( $[\text{M}+\text{H}]^+$ ):  $m/z$  = 372.1707; exp 372.1707. Analysis calcd (%) for  $\text{C}_{23}\text{H}_{21}\text{N}_3\text{O}_2$  (371.44): C 74.37, H 5.70, N 11.31; found: C 73.41, H 5.76, N 10.80.

**2-(1-(4-((6-(4-Cyanophenoxy)hexyl)oxy)phenyl)ethylidene)malononitrile (13b)**; A biphasic mixture of **9b** (2.57 g, 7.62 mmol), malononitrile (1.85 g, 28.0 mmol),  $\text{NH}_4\text{OAc}$  (3.40 g, 44.1 mmol) in toluene (100 mL) and AcOH (4 mL) was heated using a Dean-Stark apparatus for 3 h. The vessel was cooled, diluted with toluene (100 mL) and decanted into a separatory funnel and water (100 mL) was added. The phases were separated and the organic phase washed with water (3 x 100 mL) and brine (100 mL). The organic phase was dried over  $\text{MgSO}_4$ , filtered and the solvent removed in vacuo. The residue was purified by flash column chromatography ( $\text{CH}_2\text{Cl}_2$ ) to give **13b** (2.42 g, 82%), as a white solid.  $R_f=0.61$  ( $\text{CH}_2\text{Cl}_2$ ). M.p. = 62.5-64.5 °C.  $^1\text{H}$  NMR (500 MHz,  $\text{CDCl}_3$ ):  $\delta$  = 7.60 (d,  $J$  = 8.9 Hz, 2H), 7.57 (d,  $J$  = 8.9 Hz, 2H) 6.97 (d,  $J$  = 8.9 Hz, 2H), 6.93 (d,  $J$  = 8.9 Hz, 2H), 4.04 (t,  $J$  = 6.4 Hz, 2H), 4.02 (t,  $J$  = 6.3 Hz, 2H), 2.61 (s, 3H), 1.86-1.83 (m, 4H), 1.57-1.54 (m, 4H) ppm.  $^{13}\text{C}$  NMR (125 MHz,  $\text{CDCl}_3$ ):  $\delta$  = 174.1, 162.8, 162.5, 134.1, 130.0, 127.9, 119.4, 115.3, 115.0, 113.8, 113.5, 103.9, 82.0, 68.3, 29.1, 29.1, 25.9, 25.9, 23.9 ppm, 1C masked. HRMS (MALDI +ve) calcd for  $\text{C}_{24}\text{H}_{24}\text{N}_3\text{O}_2$  ( $[\text{M}+\text{H}]^+$ ):  $m/z$  = 386.1858; exp 386.1864. Analysis calcd (%) for  $\text{C}_{24}\text{H}_{23}\text{N}_3\text{O}_2$  (385.47): C 74.78, H 6.01, N 10.90; found: C 74.75, H 5.73, N 10.81.

**2-(1-(4-((8-(4-Cyanophenoxy)octyl)oxy)phenyl)ethylidene)malononitrile (13c)**; A biphasic mixture of **9c** (2.53 g, 6.92 mmol), malononitrile (1.56 g, 23.6 mmol),  $\text{NH}_4\text{OAc}$  (2.88 g, 37.4 mmol) in toluene (100 mL) and AcOH (4 mL) was heated using a Dean-Stark apparatus for 3 h. The vessel was cooled, diluted with toluene (100 mL) and decanted into a separatory funnel and water (100 mL) was added. The phases were separated and the organic phase washed with water (3 x 100 mL) and brine (100 mL). The organic phase was dried over  $\text{MgSO}_4$ , filtered and the solvent removed in vacuo. The residue was purified by flash column chromatography ( $\text{CH}_2\text{Cl}_2$ ) to give **13c** (2.02 g, 71%), as a white solid.  $R_f=0.62$  ( $\text{CH}_2\text{Cl}_2$ ). M.p. = 67.0-67.7 °C.  $^1\text{H}$  NMR (500 MHz,  $\text{CDCl}_3$ ):  $\delta$  = 7.64 (d,  $J$  = 8.9 Hz, 2H), 7.60 (d,  $J$  = 8.9 Hz, 2H) 7.00 (d,  $J$  = 8.9 Hz, 2H), 6.96 (d,  $J$  = 8.9 Hz, 2H), 4.05 (t,  $J$  = 6.5 Hz, 2H), 4.02 (t,  $J$  = 6.4 Hz, 2H), 2.64 (s, 3H), 1.87-1.81 (m, 4H), 1.54-1.48 (m, 4H), 1.46-1.41 ppm.  $^{13}\text{C}$  NMR (125 MHz,  $\text{CDCl}_3$ ):  $\delta$  = 174.2, 162.8, 162.5, 134.1, 130.0, 127.7, 119.5, 115.2, 114.9, 113.9, 113.6, 103.7, 81.8, 68.4, 29.4, 29.1, 29.1, 26.0, 26.0, 24.0 ppm. HRMS (MALDI +ve) calcd for  $\text{C}_{26}\text{H}_{28}\text{N}_3\text{O}_2$  ( $[\text{M}+\text{H}]^+$ ):  $m/z$  = 414.2176; exp 414.2177. Analysis calcd (%) for  $\text{C}_{26}\text{H}_{27}\text{N}_3\text{O}_2$  (413.52): C 75.52, H 6.58, N 10.16; found: C 75.13, H 6.29, N 10.19.

**2-(1-(4-((9-(4-Cyanophenoxy)nonyloxy)phenyl)ethylidene)malononitrile (13d)**; A biphasic mixture of **9d** (3.11 g, 8.19 mmol), malononitrile (2.47 g, 37.4 mmol), NH<sub>4</sub>OAc (6.15 g, 79.8 mmol) in toluene (100 mL) and AcOH (7 mL) was heated using a Dean-Stark apparatus for 3 h. The vessel was cooled, diluted with toluene (100 mL) and decanted into a separatory funnel and water (100 mL) was added. The phases were separated and the organic phase washed with water (3 x 100 mL) and brine (100 mL). The organic phase was dried over MgSO<sub>4</sub>, filtered and the solvent removed in vacuo. The residue was purified by flash column chromatography (CH<sub>2</sub>Cl<sub>2</sub>) to give **13d** (3.08 g, 88%), as a white solid. *R*<sub>f</sub>=0.68 (CH<sub>2</sub>Cl<sub>2</sub>). M.p. = 87.1-88.1 °C. <sup>1</sup>H NMR (500 MHz, CDCl<sub>3</sub>): δ = 7.60 (d, *J* = 8.9 Hz, 2H), 7.57 (d, *J* = 8.8 Hz, 2H), 6.97 (d, *J* = 8.9 Hz, 2H), 6.93 (d, *J* = 8.8 Hz, 2H), 4.01 (t, *J* = 6.5 Hz, 2H), 3.99 (t, *J* = 6.5 Hz, 2H), 2.61 (s, 3H), 1.83-1.77 (m, 4H), 1.49-1.43 (m, 4H), 1.39-1.35 (m, 6H) ppm. <sup>13</sup>C NMR (125 MHz, CDCl<sub>3</sub>): δ = 174.2, 162.8, 162.5, 134.1, 130.0, 127.7, 119.5, 115.3, 115.0, 113.9, 113.6, 103.7, 81.8, 68.5, 68.5, 29.6, 29.4, 29.1, 29.1, 26.1, 26.0, 23.9 ppm, 1C masked. HRMS (MALDI +ve) calcd for C<sub>27</sub>H<sub>29</sub>N<sub>3</sub>O<sub>2</sub>Na ([M+Na]<sup>+</sup>): *m/z* = 450.2157; exp 450.2153. Analysis calcd (%) for C<sub>27</sub>H<sub>29</sub>N<sub>3</sub>O<sub>2</sub> (427.55): C 75.85, H 6.84, N 9.83; found: C 75.50, H 6.81, N 9.80.

**2-(1-(4-((10-(4-Cyanophenoxy)decyl)oxy)phenyl)ethylidene)malononitrile (13e)**; A biphasic mixture of **9e** (3.01 g, 7.65 mmol), malononitrile (2.39 g, 36.2 mmol), NH<sub>4</sub>OAc (4.95 g, 64.2 mmol) in toluene (100 mL) and AcOH (6 mL) was heated using a Dean-Stark apparatus for 3 h. The vessel was cooled, diluted with toluene (100 mL) and decanted into a separatory funnel and water (100 mL) was added. The phases were separated and the organic phase washed with water (3 x 100 mL) and brine (100 mL). The organic phase was dried over MgSO<sub>4</sub>, filtered and the solvent removed in vacuo. The residue was purified by flash column chromatography (CH<sub>2</sub>Cl<sub>2</sub>) to give **13e** (2.80 g, 83%), as a white solid. *R*<sub>f</sub>=0.65 (CH<sub>2</sub>Cl<sub>2</sub>). M.p. = 62.6-63.8 °C. <sup>1</sup>H NMR (500 MHz, CDCl<sub>3</sub>): δ = 7.60 (d, *J* = 8.9 Hz, 2H), 7.57 (d, *J* = 8.8 Hz, 2H), 6.97 (d, *J* = 8.9 Hz, 2H), 6.93 (d, *J* = 8.8 Hz, 2H), 4.01 (t, *J* = 6.5 Hz, 2H), 3.99 (t, *J* = 6.5 Hz, 2H), 2.61 (s, 3H), 1.83-1.77 (m, 4H), 1.47-1.43 (m, 4H), 1.37-1.31 (m, 8H) ppm. <sup>13</sup>C NMR (125 MHz, CDCl<sub>3</sub>): δ = 174.2, 162.8, 162.5, 134.1, 130.0, 127.7, 199.5, 115.3, 115.0, 113.9, 113.6, 103.7, 81.8, 68.5, 68.5, 29.6, 29.4, 29.1, 29.1, 26.1, 26.0, 23.9 ppm, 2Cs masked. HRMS (MALDI +ve) calcd for C<sub>28</sub>H<sub>32</sub>N<sub>3</sub>O<sub>2</sub> ([M+H]<sup>+</sup>): *m/z* = 442.2489; exp 442.2491. Analysis calcd (%) for C<sub>28</sub>H<sub>31</sub>N<sub>3</sub>O<sub>2</sub> (441.58): C, 76.16; H, 7.08; N, 9.52; found: C 76.30, H 7.07, N 9.50.

**2-(1-(4'-(Octyloxy)-[1,1'-biphenyl]-4-yl)ethylidene)malononitrile (13f)**; A mixture of **9f** (5.57 g, 17.2 mmol), malononitrile (3.55 g, 53.7 mmol) and NH<sub>4</sub>OAc (4.69 g, 60.8 mmol) in toluene (300 mL) and AcOH (6.5 mL, 113 mmol) was equipped with a Dean-Stark trap and heated to reflux point for 5 h. Additional malononitrile (2.13 g, 32.2 mmol), NH<sub>4</sub>OAc (2.26 g, 29.3 mmol) and glacial AcOH (3.2 mL, 56 mmol) were added and the mixture heated an additional 2 h. A third portion of malononitrile (2.18 g, 33.0 mmol), NH<sub>4</sub>OAc (2.39 g, 31.0 mmol) and glacial AcOH (3.2 mL, 56 mmol) was added and the mixture heated an additional 3 h. The contents of the vessel were allowed to cool to rt, washed with water (4 x 250 mL) and brine (1 x 250 mL), dried over MgSO<sub>4</sub> and filtered. The solvent was removed under reduced pressure and the crude residue was crystallized from CH<sub>2</sub>Cl<sub>2</sub>/heptane to give pure **13f** (4.60 g, 70%) as a white solid. *R*<sub>f</sub>=0.56 (toluene). M.p. = 58.6–59.4 °C. <sup>1</sup>H NMR

(500 MHz, CDCl<sub>3</sub>):  $\delta$  = 7.68 (d,  $J$  = 8.5 Hz, 2H), 7.64 (d,  $J$  = 8.5 Hz, 2H), 7.56 (d,  $J$  = 8.7 Hz, 2H), 6.99 (d,  $J$  = 8.7 Hz, 2H), 4.01 (t,  $J$  = 6.6 Hz, 2H), 2.67 (s, 3H), 1.84–1.78 (m, 2H), 1.51–1.45 (m, 2H), 1.40–1.26 (m, 8H), 0.90 (t,  $J$  = 6.9 Hz, 2H) ppm. <sup>13</sup>C NMR (125 MHz, CDCl<sub>3</sub>):  $\delta$  = 174.7, 159.9, 145.2, 133.8, 131.5, 128.4, 128.3, 127.1, 115.2, 113.2, 83.8, 68.3, 32.0, 29.5, 29.4, 29.4, 26.2, 24.1, 22.8, 14.3 ppm. HRMS (MALDI +ve) calcd for C<sub>25</sub>H<sub>28</sub>N<sub>2</sub>O<sub>Na</sub> [(M+Na)<sup>+</sup>]:  $m/z$  = 395.2094; exp 395.2102. Analysis calcd (%) for C<sub>25</sub>H<sub>28</sub>N<sub>2</sub>O (372.51): C 80.61, H 7.58, N 7.52; found: C 80.67, H 7.67, N 7.38.

**2-(1-(2',3'-Difluoro-4'-(octyloxy)-[1,1'-biphenyl]-4-yl)ethylidene)malononitrile (13g)**; A mixture of **9g** (4.62 g, 12.8 mmol), malononitrile (2.38 g, 36.0 mmol) and NH<sub>4</sub>OAc (3.39 g, 44.0 mmol) in toluene (300 mL) and AcOH (4.8 mL, 84 mmol) was equipped with a Dean-Stark trap and heated to reflux point for 3 h. Additional malononitrile (2.76 g, 41.8 mmol), NH<sub>4</sub>OAc (3.53 g, 45.8 mmol) and AcOH (4.8 mL, 84 mmol) were added and the mixture was refluxed for a further 2 h. TLC analysis indicated the presence of **9g** and therefore additional malononitrile (1.89 g, 28.6 mmol), NH<sub>4</sub>OAc (1.98 g, 25.7 mmol) and AcOH (2.52 g, 2.4 mL, 41.9 mmol) were added and the reaction mixture was refluxed for 2 h. The reaction mixture was allowed to cool to rt, washed with water (4 x 250 mL), dried over MgSO<sub>4</sub> and filtered. The solvent was removed in vacuo and the residue crystallized from CH<sub>2</sub>Cl<sub>2</sub>/heptane to give **13g** (3.75 g, 72%) as a white solid.  $R_f$ =0.61 (toluene). M.p. = 59.5–60.4 °C. <sup>1</sup>H NMR (500 MHz, CDCl<sub>3</sub>):  $\delta$  = 7.65 (apparent s, 4H), 7.16–7.10 (ddd,  $J$  = 8.7, 8.2, 2.4, 1H), 6.83 (ddd,  $J$  = 9.1, 7.5, 1.8 Hz, 1H), 4.09 (t,  $J$  = 6.6 Hz, 2H), 2.68 (s, 3H), 1.92–1.81 (m, 2H), 1.54–1.44 (m, 2H), 1.42–1.22 (m, 8H), 0.89 (t,  $J$  = 6.8, 1H) ppm. <sup>13</sup>C NMR (125 MHz, CDCl<sub>3</sub>):  $\delta$  = 174.7, 149.1 (dd,  $J$  = 250, 11.4 Hz), 149.0 (dd,  $J$  = 8.1, 3.1 Hz), 141.9 (dd,  $J$  = 248.2, 14.8 Hz), 139.3, 134.9, 129.4, 129.4, 127.9, 123.8, 123.7, 123.7, 121.2, 121.1, 113.1, 112.9, 109.9, 84.7, 70.1, 31.9, 29.4, 29.4, 29.3, 26.0, 24.3, 22.8, 14.2 ppm. HRMS (MALDI +ve) calcd for C<sub>25</sub>H<sub>27</sub>F<sub>2</sub>N<sub>2</sub>O [(M+H)<sup>+</sup>]:  $m/z$  = 409.2086; exp 409.2095. Analysis calcd (%) for C<sub>25</sub>H<sub>26</sub>F<sub>2</sub>N<sub>2</sub>O (408.49): C 73.51, H 6.42, N 6.86; found: C 73.33, H 6.30, N 6.78.

**2-(1-(2,3-Difluoro-4-(octyloxy)phenyl)ethylidene)malononitrile (13h)**; A mixture consisting of **9h** (5.84 g, 20.6 mmol), malononitrile (3.83 g, 57.9 mmol) and NH<sub>4</sub>OAc (5.44 g, 70.6 mmol) in toluene (250 mL) and AcOH (7.75 mL, 135 mmol) was heated using a Dean-Stark apparatus for 1 h. The reaction was not determined to be complete by TLC and malononitrile (3.98 g 60.3 mmol), NH<sub>4</sub>OAc (5.32 g, 69.0 mmol) and AcOH (7.75 mL, 135 mmol) were added to the vessel and the mixture was refluxed for a further 2 h. Extra malononitrile (3.71 g, 56.2 mmol), NH<sub>4</sub>OAc (5.45 g, 70.7 mmol) and AcOH (7.75 mL, 135 mmol) were again added and the reaction mixture was heated for 2 h and allowed to cool to rt. The reaction mixture was washed with water (4 x 240 mL) and brine (1 x 250 mL), dried with MgSO<sub>4</sub>, filtered and concentrated under reduced pressure to the give pure **13h** (6.79 g, 99%) as an off-white solid.  $R_f$ =0.62 (toluene); M.p. = 59.1–60.5 °C; <sup>1</sup>H NMR (500 MHz, CDCl<sub>3</sub>):  $\delta$  = 7.13 (ddd,  $J$  = 9.9, 7.6, 2.2 Hz, 1H), 6.82 (ddd,  $J$  = 9.9, 7.2, 1.8 Hz, 1H), 4.09 (t,  $J$  = 6.5 Hz, 2H), 2.61 (d,  $J$  = 1.6 Hz, 3H), 1.92–1.74 (m, 2H), 1.50–1.39 (m, 2H), 1.41–1.19 (m, 8H), 0.94–0.76 (m, 3H) ppm. <sup>13</sup>C NMR (125 MHz, CDCl<sub>3</sub>):  $\delta$  = 170.3 (dd,  $J$  = 2.5, 1.5 Hz), 151.9 (dd,  $J$  = 8.1, 3.7 Hz), 148.5 (dd,  $J$  = 254.3, 12.1 Hz), 141.6, (dd,  $J$  = 251.7, 13.8 Hz), 123.2 (dd,  $J$  = 4.5, 3.2 Hz), 117.4 (d,  $J$  = 10.6 Hz), 112.2, 112.1, 109.3 (dd,  $J$  = 3.1, 1.3 Hz),

87.3, 70.1, 31.8, 29.2, 29.2, 28.9, 25.8, 24.1 (d,  $J = 4.6$  Hz), 22.7, 14.1 ppm; HRMS (MALDI +ve) calcd for  $C_{19}H_{22}F_2N_2ONa$   $[(M+Na)^+]$ :  $m/z$ : 355.1592, found  $m/z = 355.1600$ .

**2-(1-(4-Octylphenyl)ethylidene)malononitrile (13i)**; A biphasic mixture consisting of **9i** (20.02 g, 86.16 mmol), malononitrile (15.39 g, 233.0 mmol) and  $NH_4OAc$  (22.03 g, 285.8 mmol) in toluene (250 mL) and AcOH (32.0 mL, 559 mmol) was heated using a Dean-Stark apparatus for 3 h. The vessel was allowed to cool to rt and the reaction mixture washed with water (5 x 200 mL), dried over  $MgSO_4$ , filtered and concentrated under vacuum to give **13i** (24.16 g; 100%) as a white solid.  $R_f=0.65$  (toluene). M.p. = 51.5–52.0 °C.  $^1H$  NMR (500 MHz,  $CDCl_3$ ):  $\delta = 7.50$  (d,  $J = 8.3$  Hz, 2H), 7.30 (d,  $J = 8.3$  Hz, 2H), 2.66 (t,  $J = 7.7$  Hz, 2H), 2.63 (s, 3H), 1.66–1.1.60 (m, 2H), 1.35–1.27 (m, 10H), 0.88 (t,  $J = 7.1$  Hz, 3H) ppm.  $^{13}C$  NMR (125 MHz,  $CDCl_3$ ):  $\delta = 175.3, 148.5, 133.3, 129.3, 127.7, 113.3, 113.2, 83.7, 36.1, 32.0, 31.2, 29.5, 29.4, 29.3, 24.2, 22.8, 14.2$  ppm. HRMS (MALDI +ve) calcd for  $C_{19}H_{24}N_2Na$   $[(M+Na)^+]$ :  $m/z = 303.1831$ ; exp 303.1838. Analysis calcd (%) for  $C_{19}H_{24}N_2$  (280.42): C 81.38, H 8.63, N 9.99; found: C 81.60, H 8.62, N 10.05.

**4-((5-Azidopentyl)oxy)benzonitrile (14a)**; To a solution of **7a** (2.04 g, 7.61 mmol) in DMSO (20 mL), under an argon atmosphere, was added  $NaN_3$  (876 mg, 13.5 mmol) and the contents of the reaction vessel were heated to 50 °C for 2 h. The cooled reaction mixture was poured into ice-water (ca. 50 g) and extracted with  $Et_2O$  (3 x 75 mL). The combined organics were washed with water (100 mL), dried over  $MgSO_4$ , filtered and the volatiles removed in vacuo. Purification by flash column chromatography (1% EtOAc/toluene) gave **14a** (1.66 g, 95%) as a white solid.  $R_f=0.41$ . M.p. = 29.1–30.5 °C.  $^1H$  NMR (500 MHz,  $CDCl_3$ ):  $\delta = 7.57$  (d,  $J = 7.6$  Hz, 2H), 6.93 (d,  $J = 7.6$  Hz, 2H), 4.01 (t,  $J = 6.3$  Hz, 2H), 3.32 (t,  $J = 6.7$  Hz, 2H), 1.84 (p,  $J = 6.3$  Hz, 2H), 1.68 (p,  $J = 6.7$  Hz, 2H), 1.65–1.51 (m, 2H) ppm.  $^{13}C$  NMR (125 MHz,  $CDCl_3$ ):  $\delta = 162.4, 134.1, 119.4, 115.3, 104.0, 68.1, 51.4, 28.7, 28.7, 23.5$  ppm. HRMS (ESP +ve) calcd for  $C_{12}H_{14}N_4ONa$   $[(M+Na)^+]$ :  $m/z = 231.1060$ ; exp 253.1060.

**4-((6-Azidohexyl)oxy)benzonitrile (14b)**; To a solution of **7b** (1.14 g, 4.04 mmol) in DMSO (20 mL), under an argon atmosphere, was added  $NaN_3$  (550 mg, 8.46 mmol) and the contents of the vessel allowed to stir at 50 °C for 2 h. The cooled reaction mixture was poured into ice-water (ca. 50 g) and extracted with  $Et_2O$  (3 x 75 mL). The combined organics were washed with water (100 mL), dried over  $MgSO_4$ , filtered and the volatiles removed in vacuo. Purification by flash column chromatography (1% EtOAc/toluene) gave **14b** (870 mg, 88%) as a white solid.  $R_f=0.42$ . M.p. = 37.4–40.5 °C.  $^1H$  NMR (500 MHz,  $CDCl_3$ ):  $\delta = 7.57$  (d,  $J = 8.8$  Hz, 2H), 6.93 (d,  $J = 8.8$  Hz, 2H), 4.00 (t,  $J = 6.4$  Hz, 2H), 3.29 (t,  $J = 6.8$  Hz, 2H), 1.82 (p,  $J = 6.4$  Hz, 2H), 1.64 (p,  $J = 6.8$  Hz, 2H), 1.57–1.42 (m, 4H) ppm.  $^{13}C$  NMR (125 MHz,  $CDCl_3$ ):  $\delta = 162.5, 134.1, 119.4, 115.3, 103.9, 68.3, 51.5, 29.0, 28.9, 26.6, 25.7$  ppm. HRMS (ESP +ve) calcd for  $C_{13}H_{16}N_4ONa$   $[(M+Na)^+]$ :  $m/z = 267.1217$ ; exp 267.1216.

**4-((8-Azidooctyl)oxy)benzonitrile (14c)**; To a solution of **7c** (1.56 g, 5.03 mmol) in DMSO (20 mL), under an argon atmosphere, was added  $NaN_3$  (512 mg, 7.88 mmol) and the contents of the vessel were allowed to stir at 50 °C for 2 h. The cooled reaction mixture was poured into ice-water (ca. 50 g) and extracted with  $Et_2O$  (3 x 75 mL). The combined organics were washed with water (100 mL), dried over  $MgSO_4$ , filtered and the volatiles



removed in vacuo. Purification by flash column chromatography (1% EtOAc/toluene) afforded **14c** (966 mg, 71%) as a white solid.  $R_f=0.44$ . M.p. = 33.9-36.5 °C.  $^1\text{H}$  NMR (500 MHz,  $\text{CDCl}_3$ ):  $\delta$  = 7.57 (d,  $J$  = 8.8 Hz, 2H), 6.93 (d,  $J$  = 8.8 Hz, 2H), 3.99 (t,  $J$  = 6.5 Hz, 2H), 3.26 (t,  $J$  = 6.6 Hz, 2H), 1.80 (p,  $J$  = 6.5 Hz, 2H), 1.63–1.56 (m, 2H), 1.53–1.16 (m, 8H) ppm.  $^{13}\text{C}$  NMR (125 MHz,  $\text{CDCl}_3$ ):  $\delta$  = 162.5, 134.1, 119.4, 115.3, 103.8, 68.5, 51.6, 29.3, 29.2, 29.1, 28.9, 26.8, 26.0 ppm. HRMS (ESP +ve) calcd for  $\text{C}_{15}\text{H}_{20}\text{N}_4\text{ONa}$  ( $[\text{M}+\text{Na}]^+$ ):  $m/z$  = 295.1529; exp 295.1530.

**4-((9-Azidononyl)oxy)benzonitrile (14d)**; To a solution of **7d** (3.35 g, 10.3 mmol) in DMSO (20 mL), under an argon atmosphere, was added  $\text{NaN}_3$  (1.01 g, 15.5 mmol) and the contents of the vessel allowed to stir at 50 °C for 2 h. The cooled reaction mixture was poured into ice-water (ca. 50 g) and extracted with  $\text{Et}_2\text{O}$  (3 x 75 mL). The combined organics were washed with water (100 mL), dried over  $\text{MgSO}_4$ , filtered and the volatiles removed in vacuo. Purification by flash column chromatography (1% EtOAc/toluene) gave **14d** (2.52 g, 85%) as a white solid.  $R_f=0.49$ . M.p. = 42.5-43.2 °C.  $^1\text{H}$  NMR (500 MHz,  $\text{CDCl}_3$ ):  $\delta$  = 7.57 (d,  $J$  = 8.8 Hz, 2H), 6.93 (d,  $J$  = 8.8 Hz, 2H), 3.99 (t,  $J$  = 6.56 Hz, 2H), 3.26 (t,  $J$  = 6.8 Hz, 2H), 1.79 (t,  $J$  = 6.56 Hz, 2H), 1.60 (t,  $J$  = 6.8 Hz, 2H), 1.51–1.25 (m, 10H) ppm.  $^{13}\text{C}$  NMR (125 MHz,  $\text{CDCl}_3$ ):  $\delta$  = 162.6, 134.1, 119.5, 115.3, 103.8, 68.5, 51.6, 29.5, 29.3, 29.2, 29.1, 29.0, 26.8, 26.0 ppm. HRMS (ESP +ve) calcd for  $\text{C}_{16}\text{H}_{22}\text{N}_4\text{ONa}$  ( $[\text{M}+\text{Na}]^+$ ):  $m/z$  = 309.1687; exp 309.1686.

**4-((10-Azidodecyl)oxy)benzonitrile (14e)**; To a solution of **7f** (3.40 g, 10.1 mmol) in DMSO (20 mL), under an argon atmosphere, was added  $\text{NaN}_3$  (982 mg, 15.1 mmol) and the contents of the vessel allowed to stir at 50 °C for 2 h. The cooled reaction mixture was poured into ice-water (ca. 50 g) and extracted with  $\text{Et}_2\text{O}$  (3 x 75 mL). The combined organics were washed with water (100 mL), dried over  $\text{MgSO}_4$ , filtered and the volatiles removed in vacuo. Purification by flash column chromatography (1% EtOAc/toluene) gave **14f** (2.68 g, 89%) as a white solid.  $R_f=0.49$ . M.p. = 46.7-47.7 °C.  $^1\text{H}$  NMR (500 MHz,  $\text{CDCl}_3$ ):  $\delta$  = 7.57 (d,  $J$  = 8.9 Hz, 2H), 6.93 (d,  $J$  = 8.9 Hz, 2H), 3.99 (t,  $J$  = 6.6 Hz, 2H), 3.26 (t,  $J$  = 6.9 Hz, 2H), 1.80 (p,  $J$  = 6.6 Hz, 2H), 1.60 (p,  $J$  = 6.9 Hz, 2H), 1.48–1.31 (m, 12H) ppm.  $^{13}\text{C}$  NMR (125 MHz,  $\text{CDCl}_3$ ):  $\delta$  = 162.4, 134.0, 119.3, 115.2, 103.7, 68.4, 51.5, 29.4, 29.4, 29.3, 29.1, 29.0, 28.8, 26.7, 25.9 ppm. HRMS (ESP +ve) calcd for  $\text{C}_{17}\text{H}_{24}\text{N}_4\text{ONa}$  ( $[\text{M}+\text{Na}]^+$ ):  $m/z$  = 323.1842; exp 323.1842.

# NMR Spectra

## Compound 7a

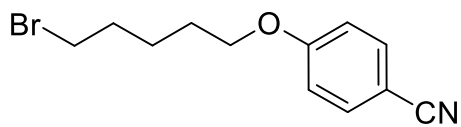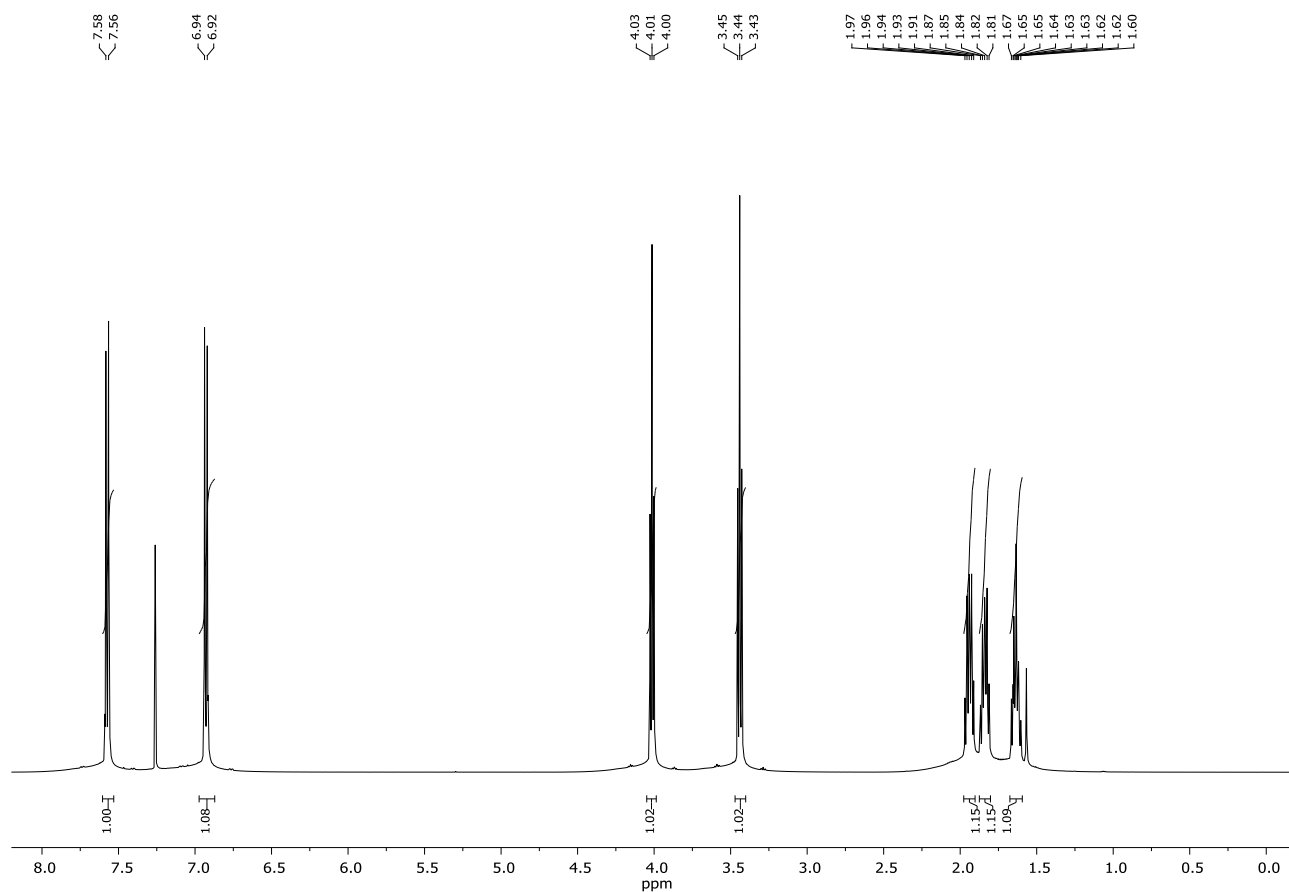

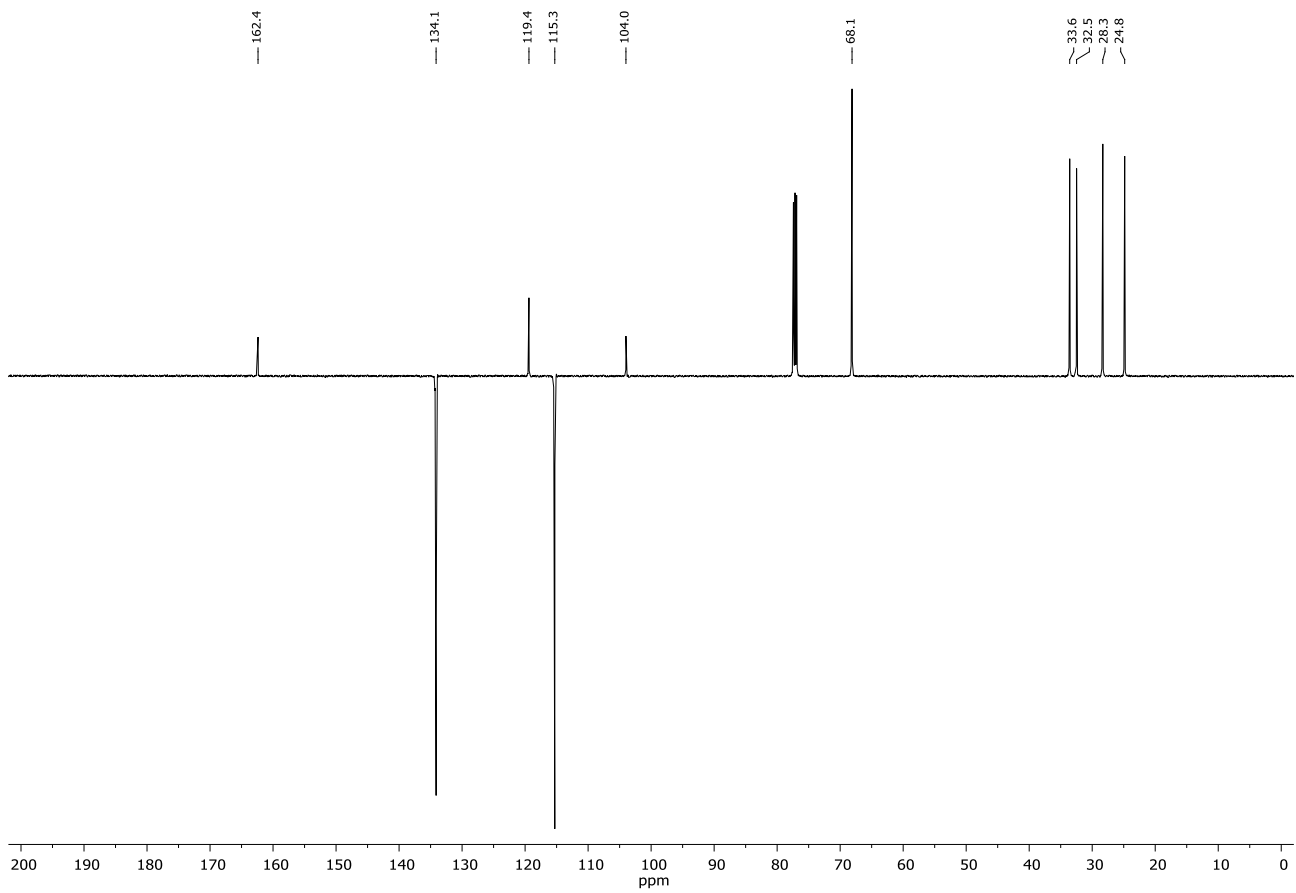

# Compound 7b

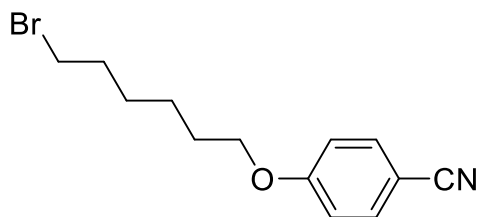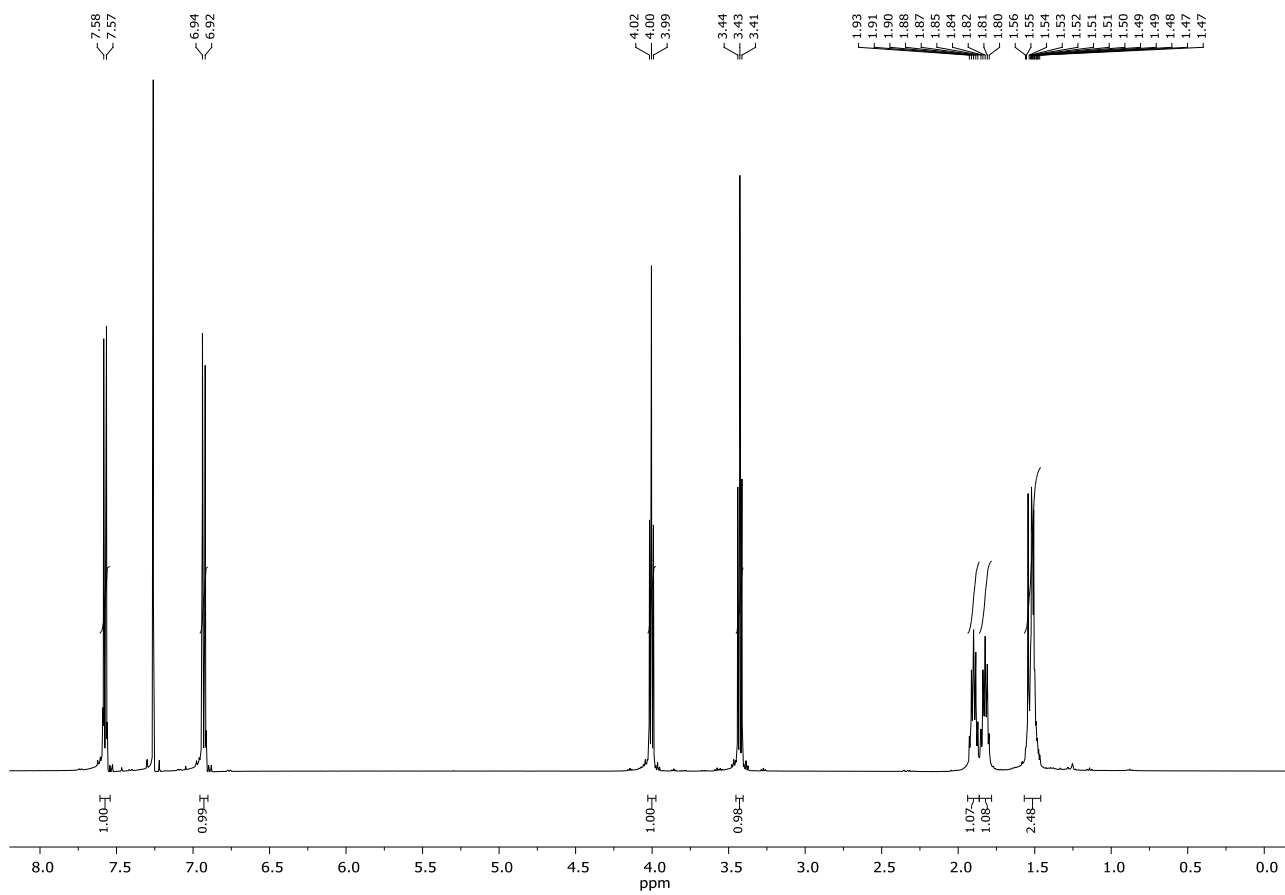

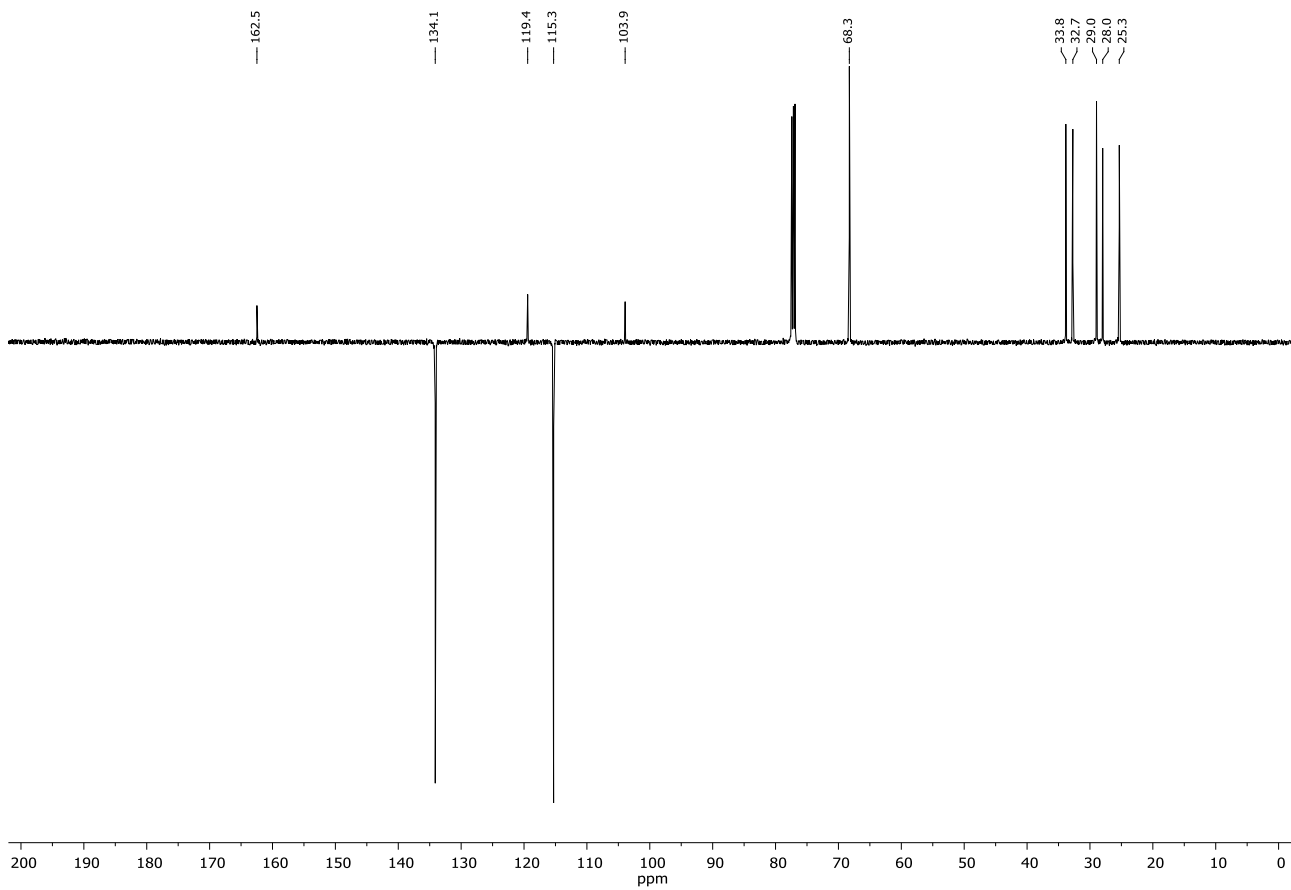

# Compound 7c

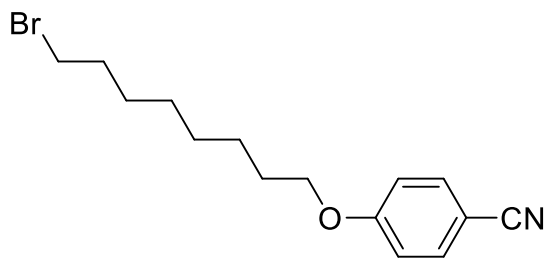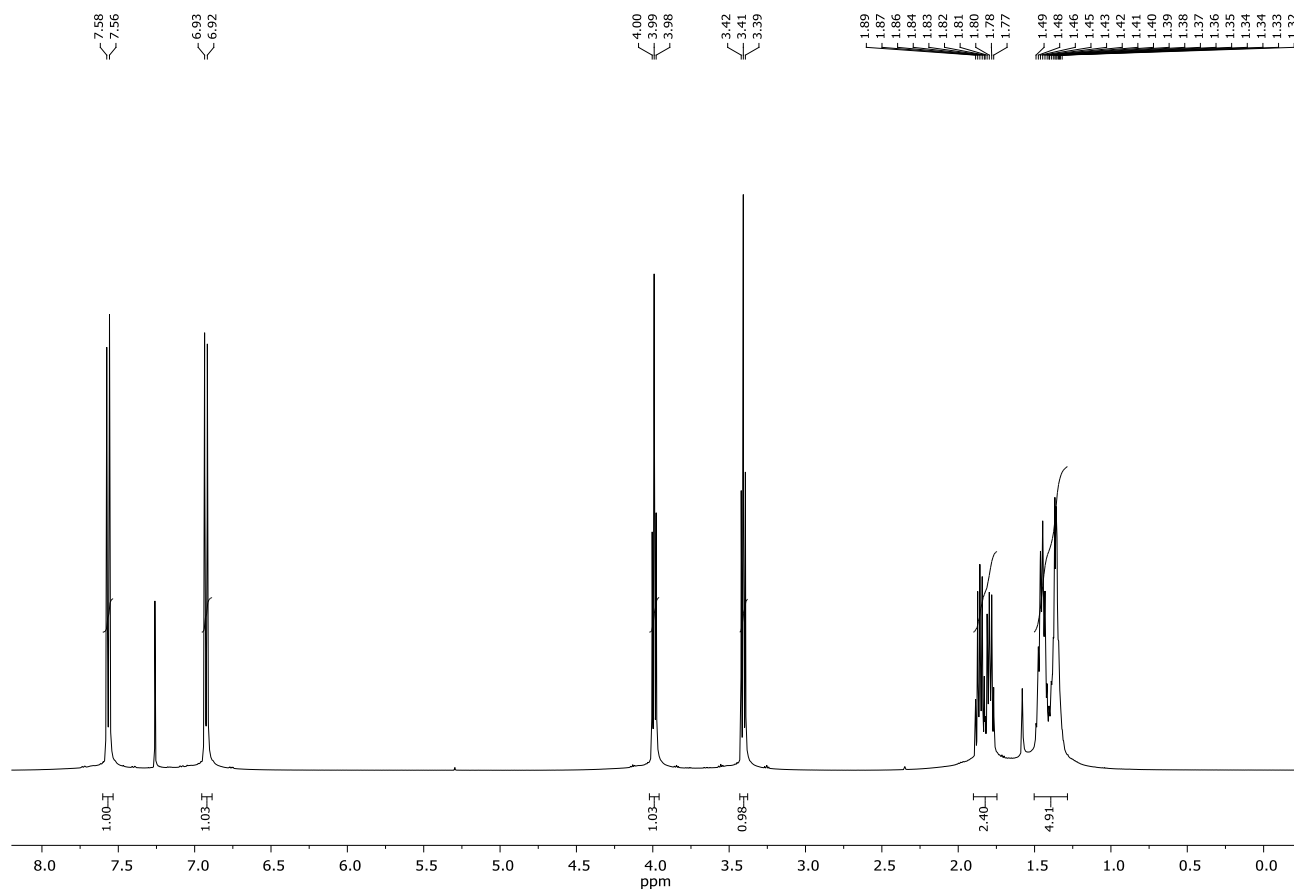

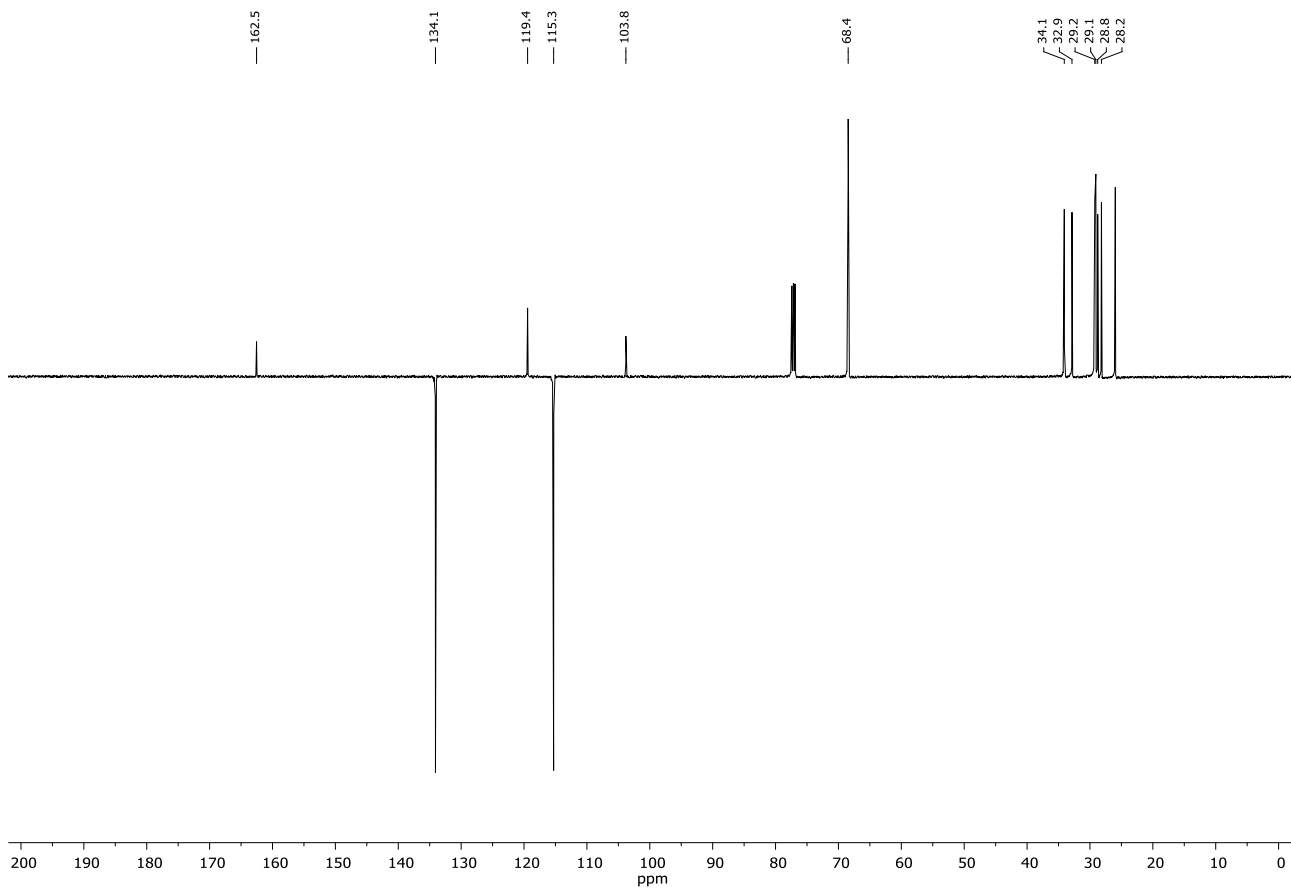

# Compound 7d

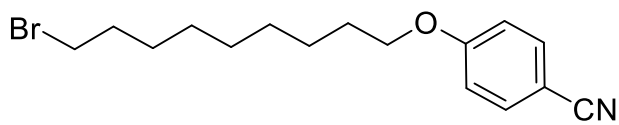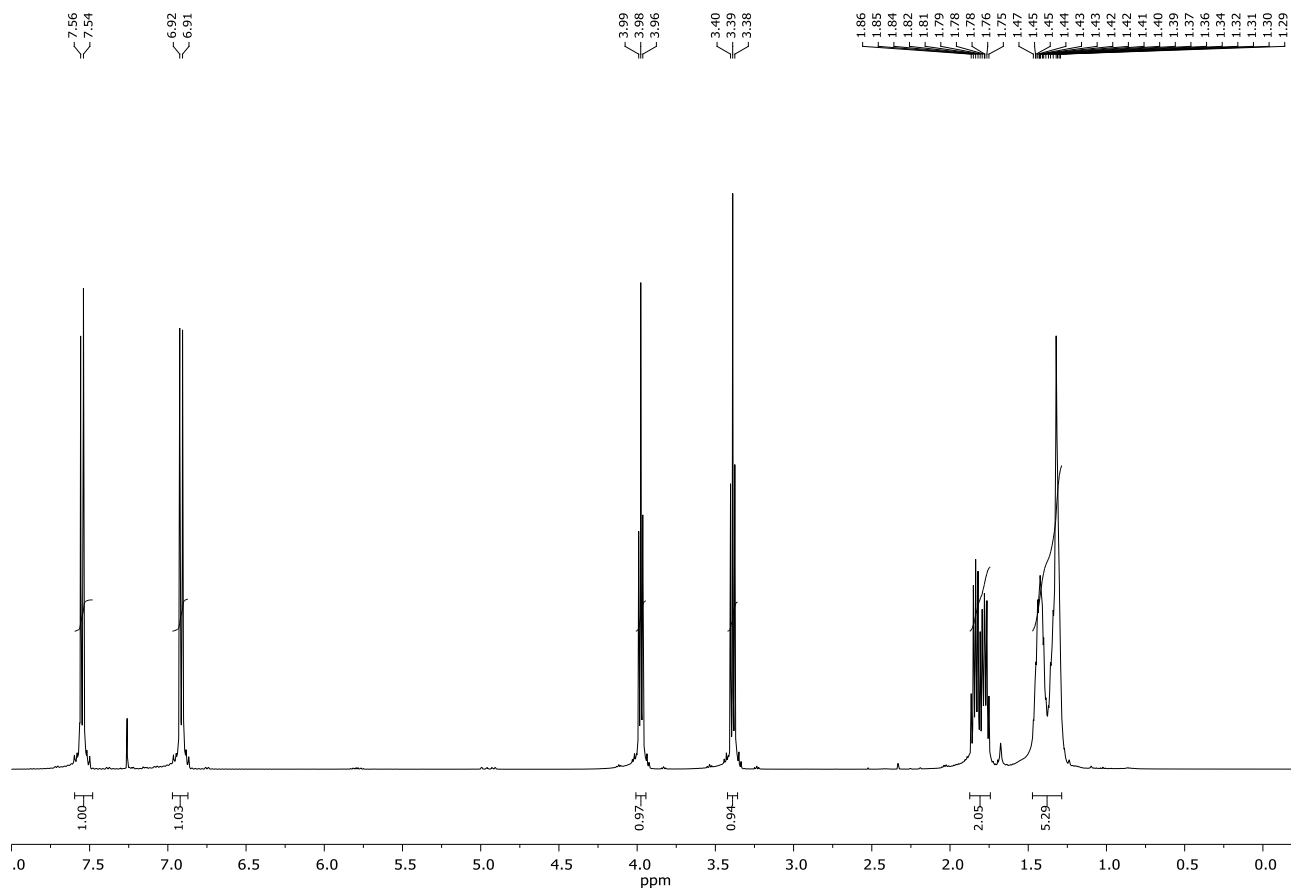



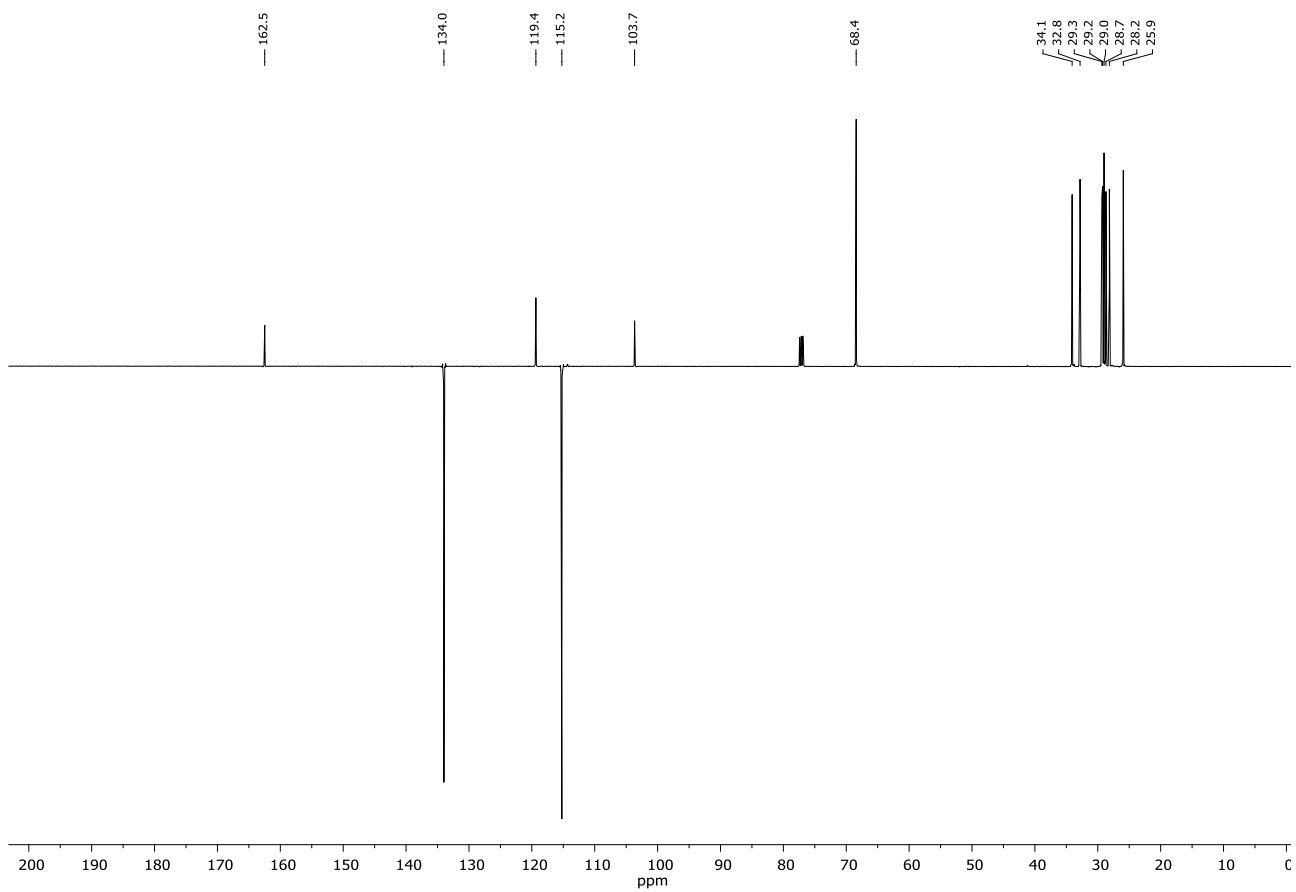

# Compound 7e

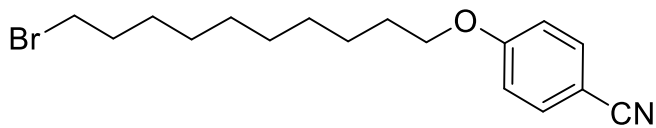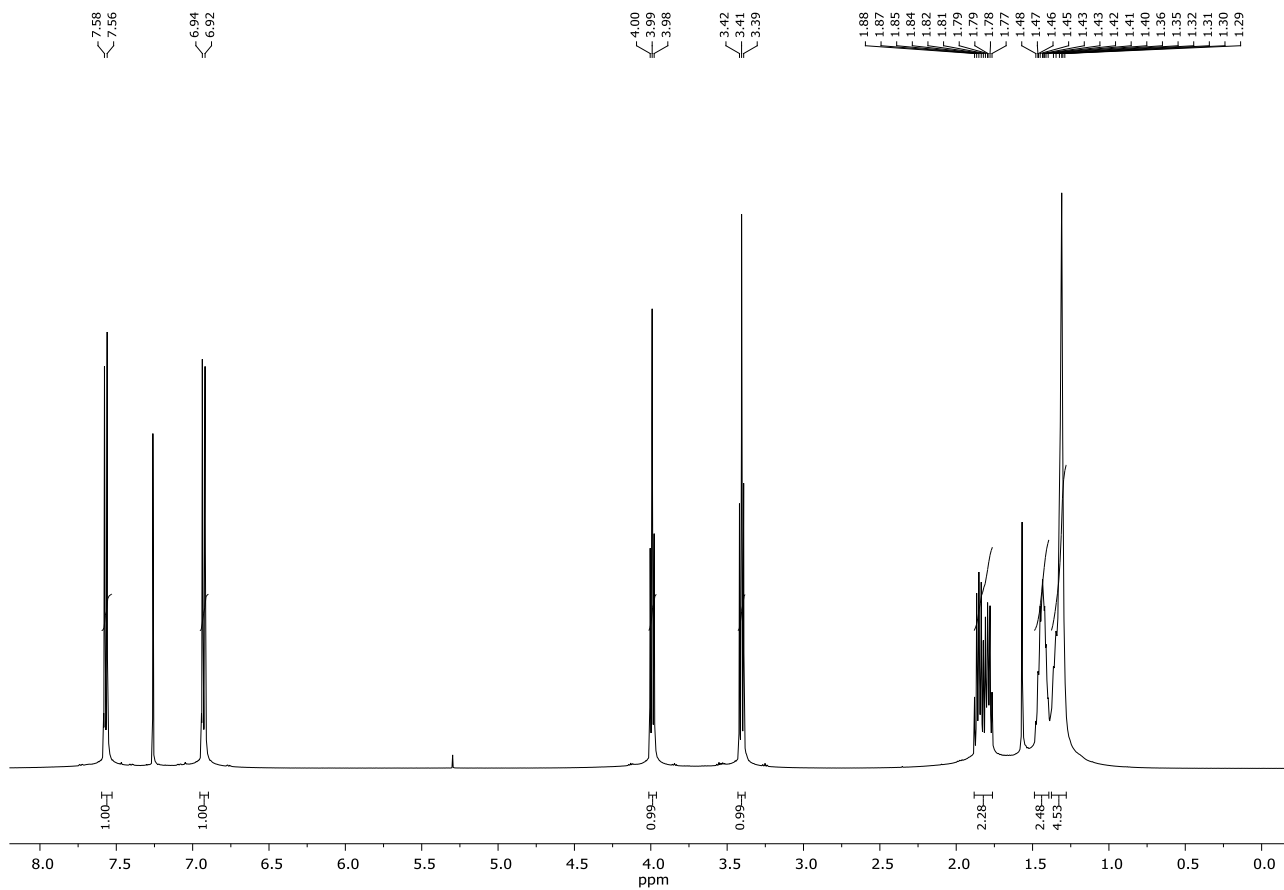

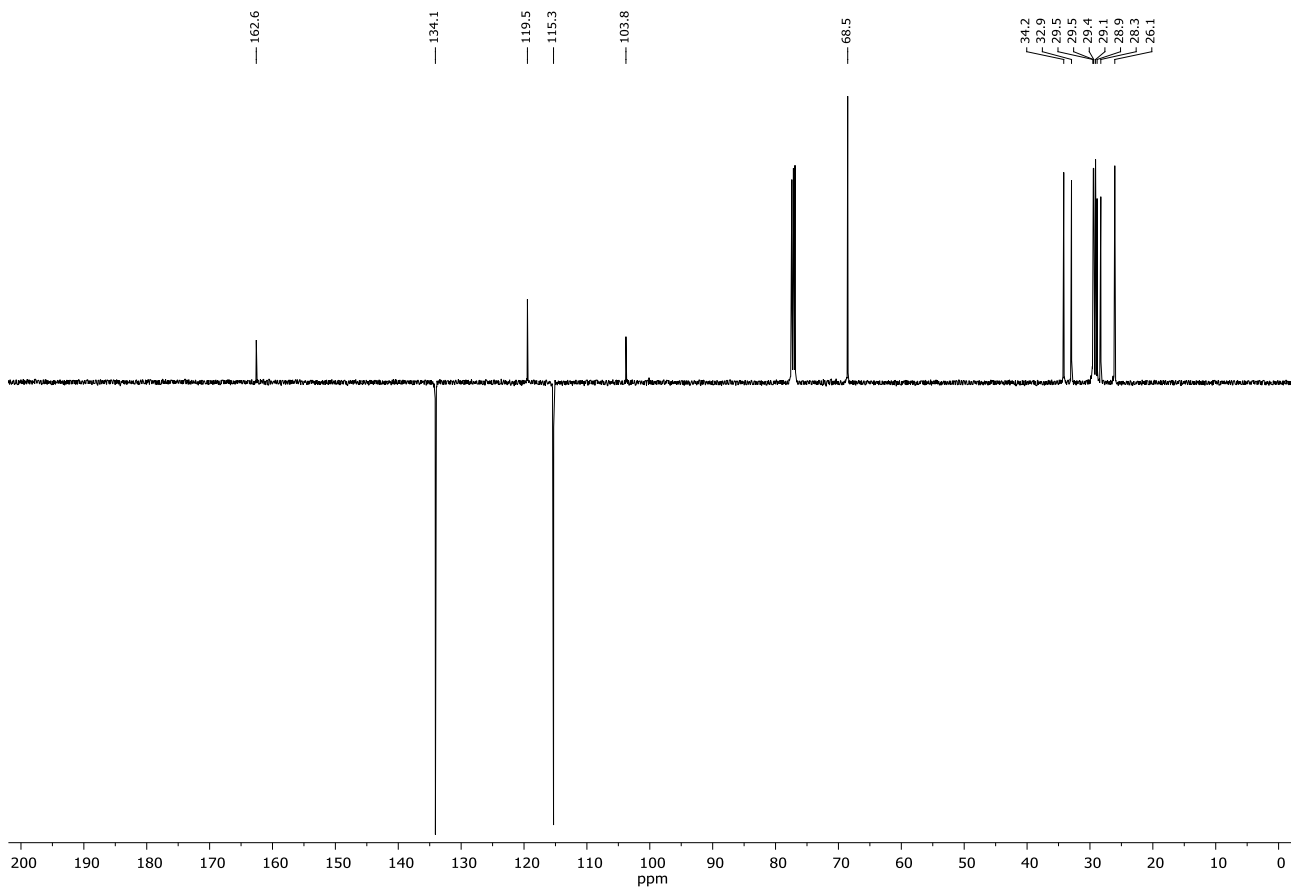

# Compound 9a

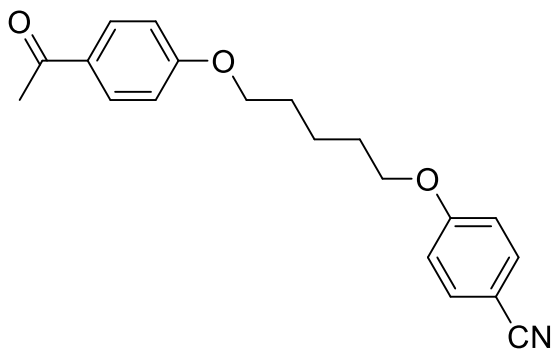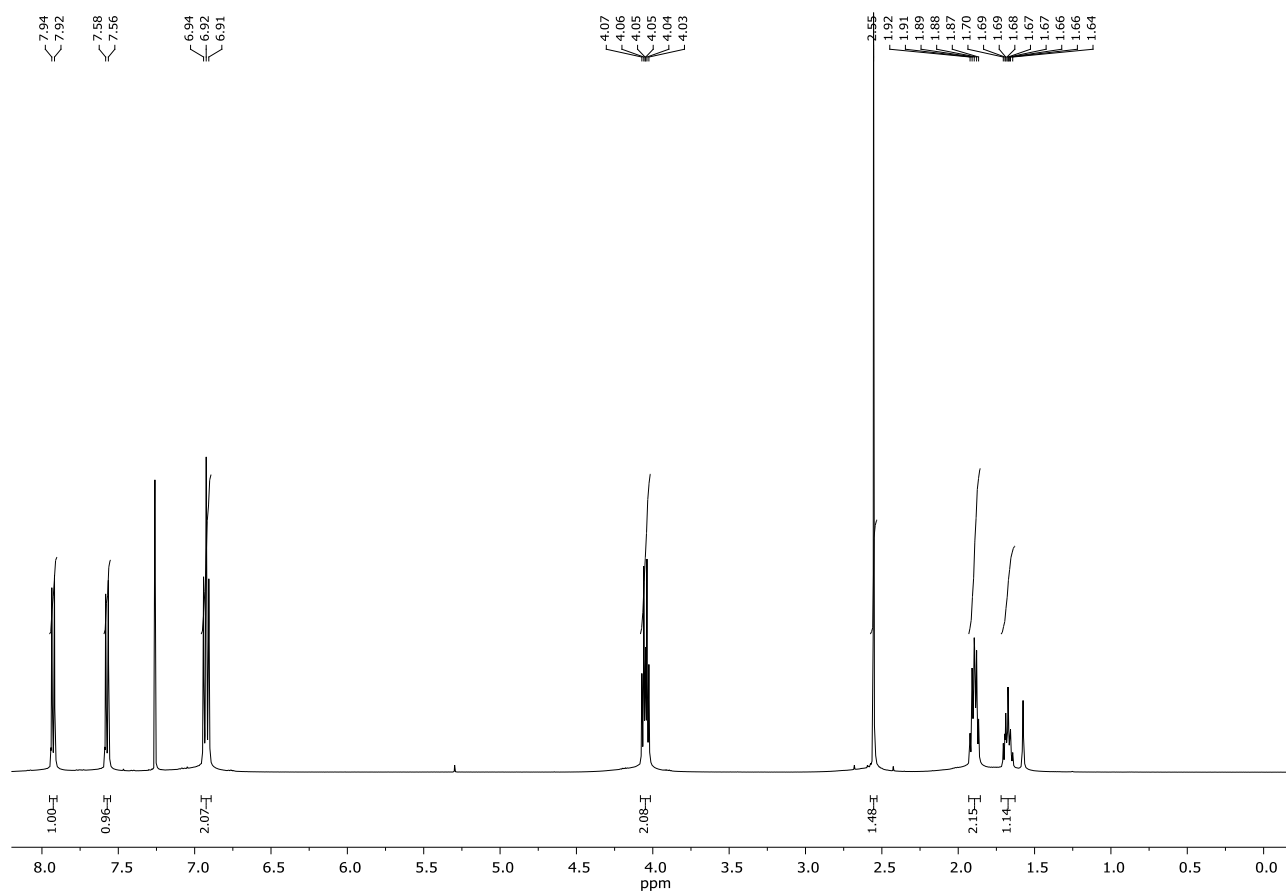

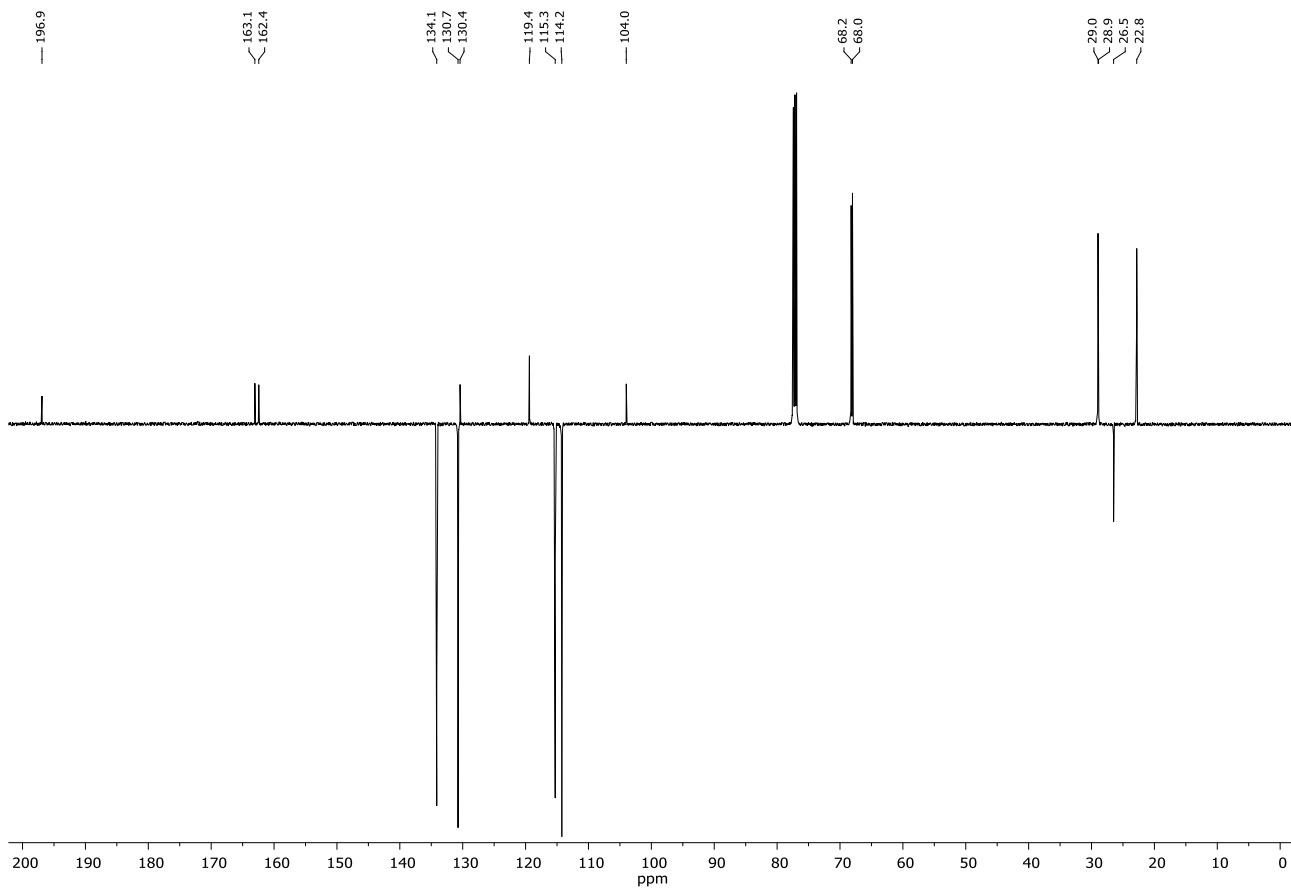

# Compound 9b

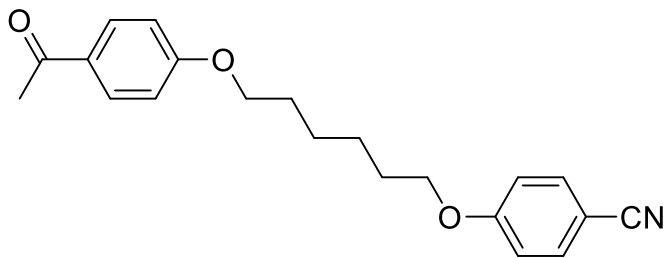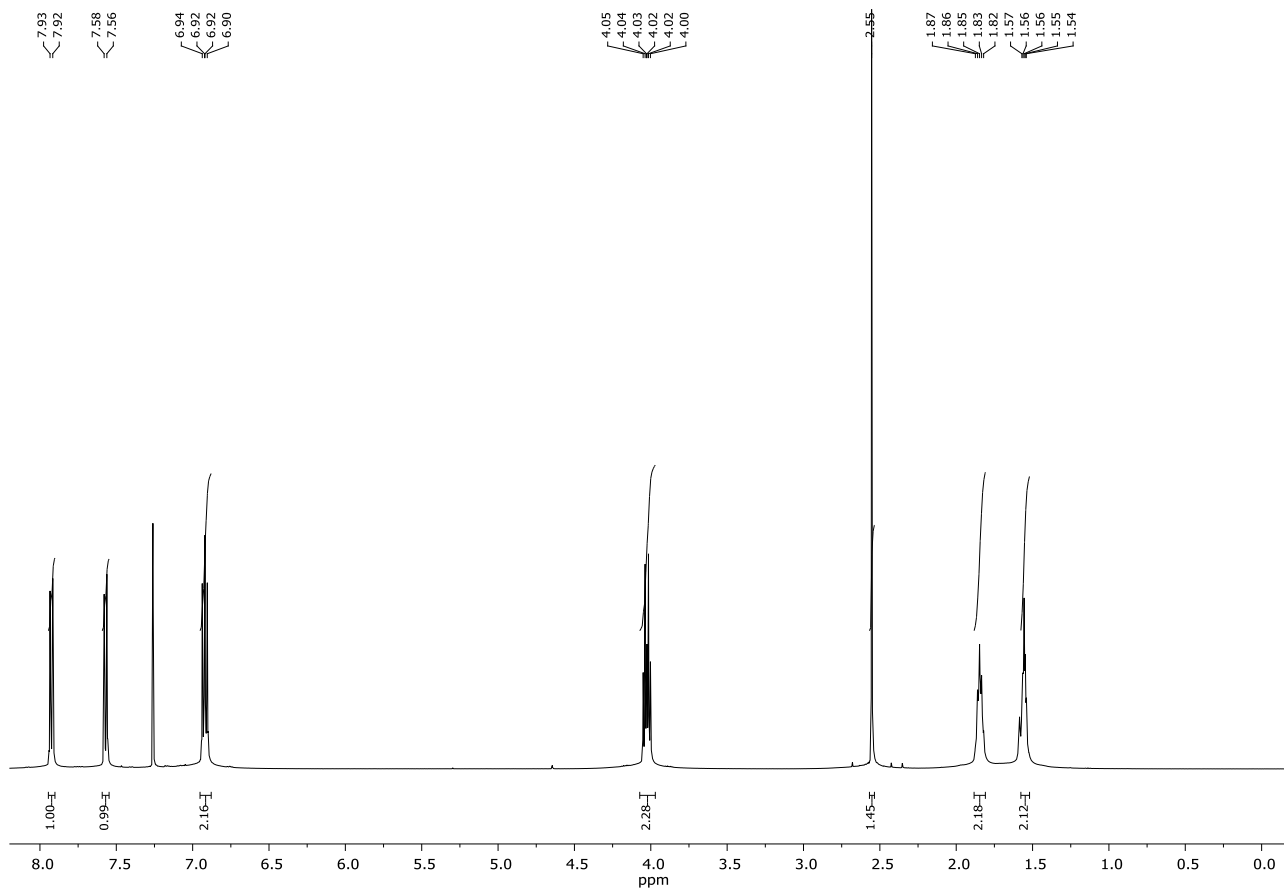

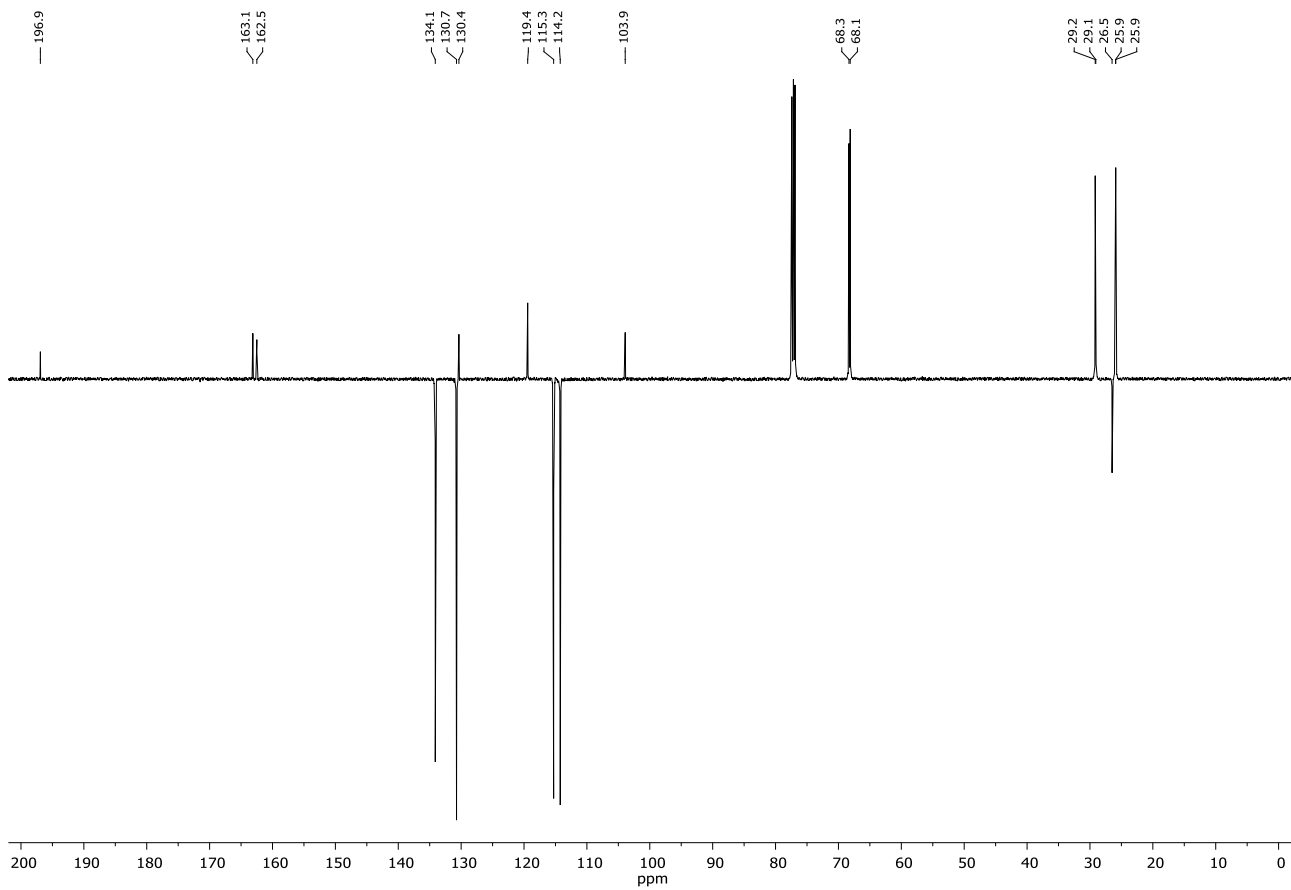

# Compound 9c

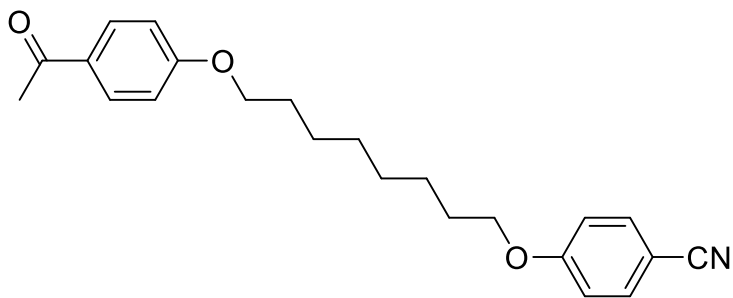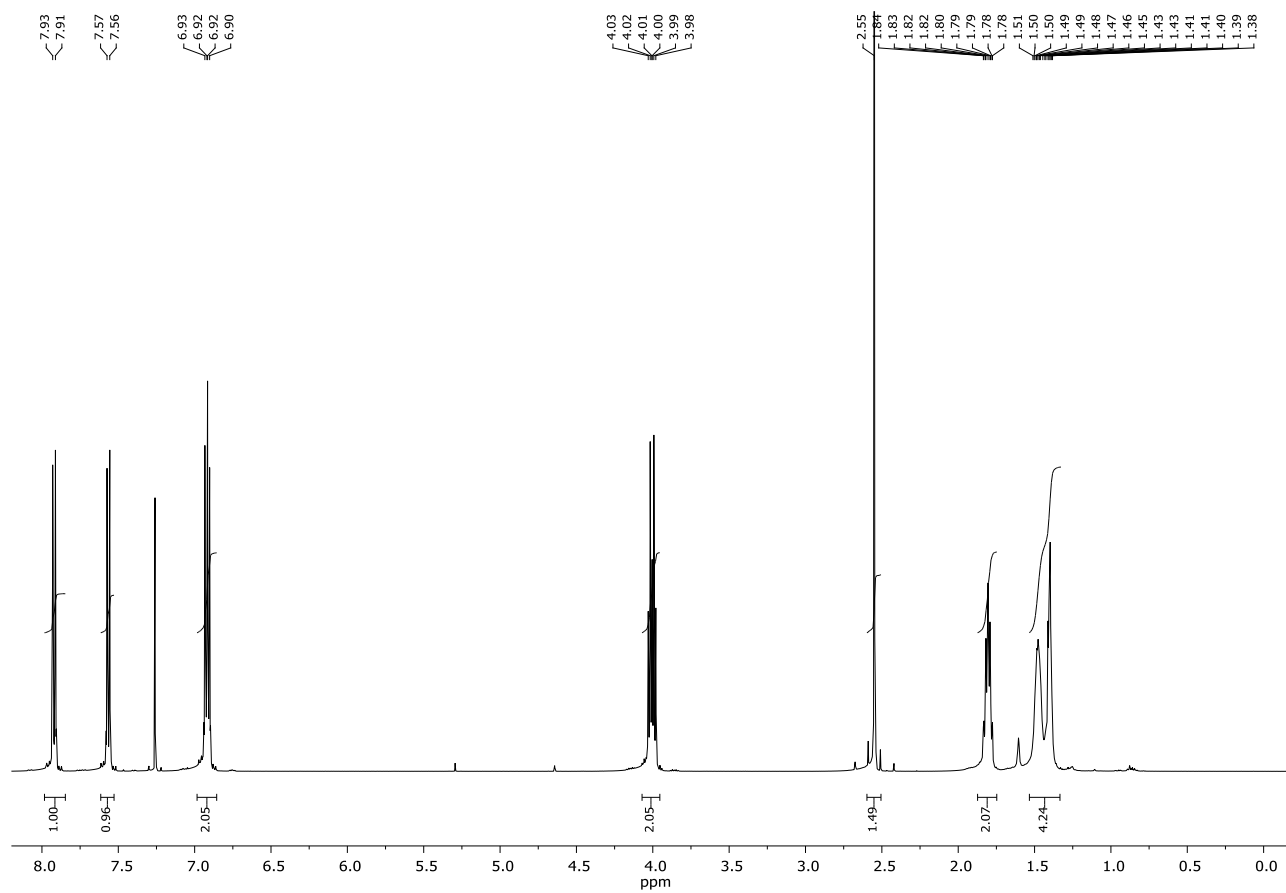



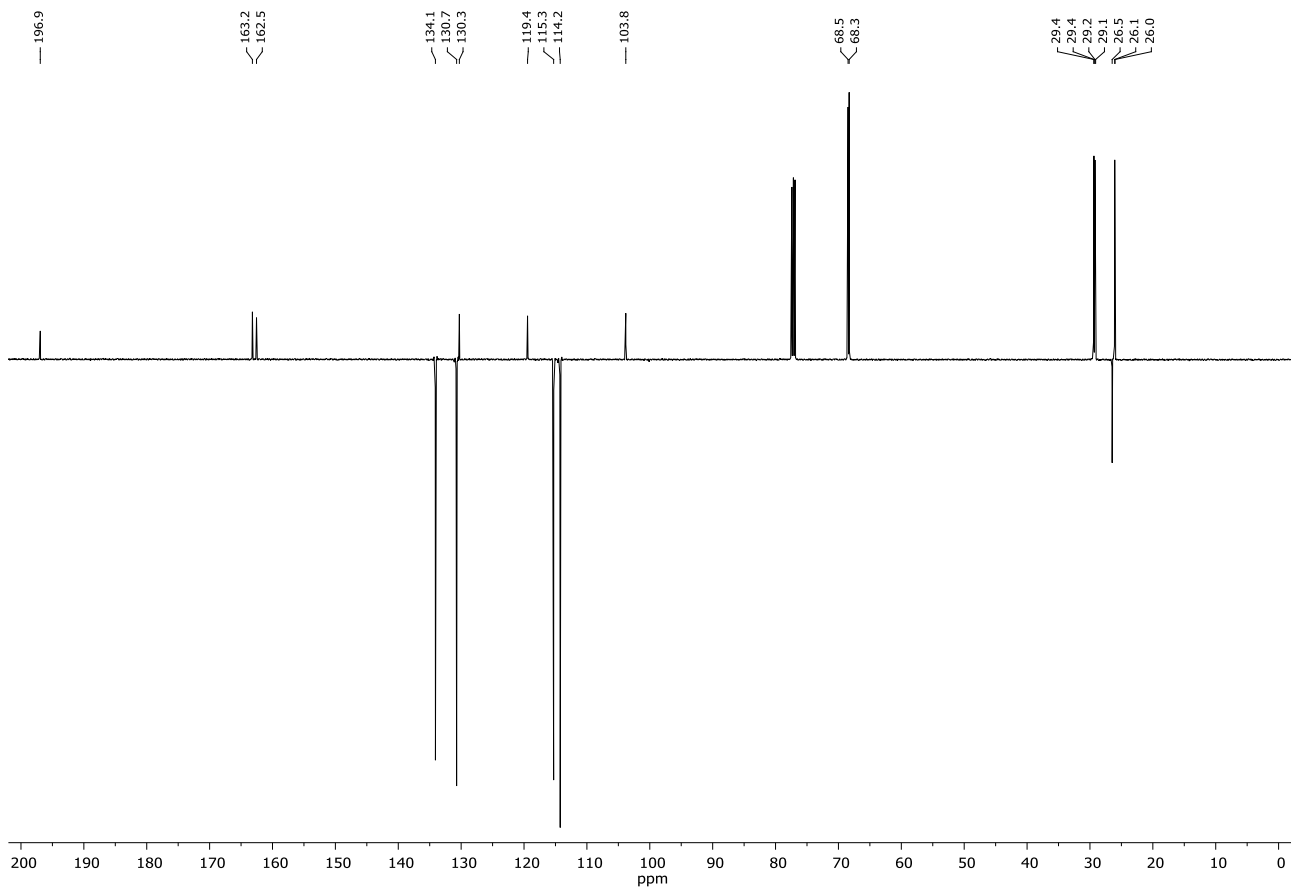

# Compound 9d

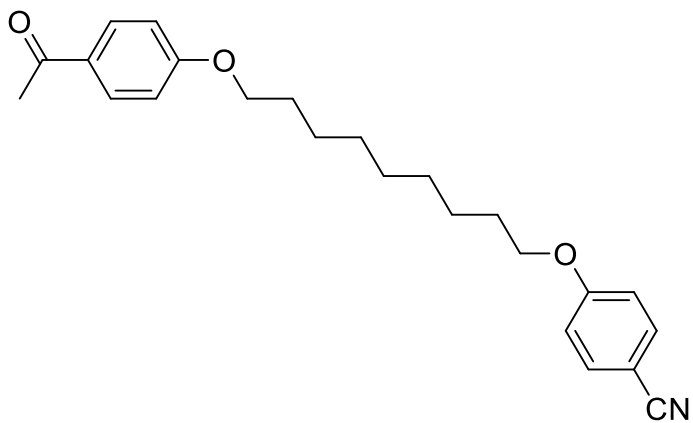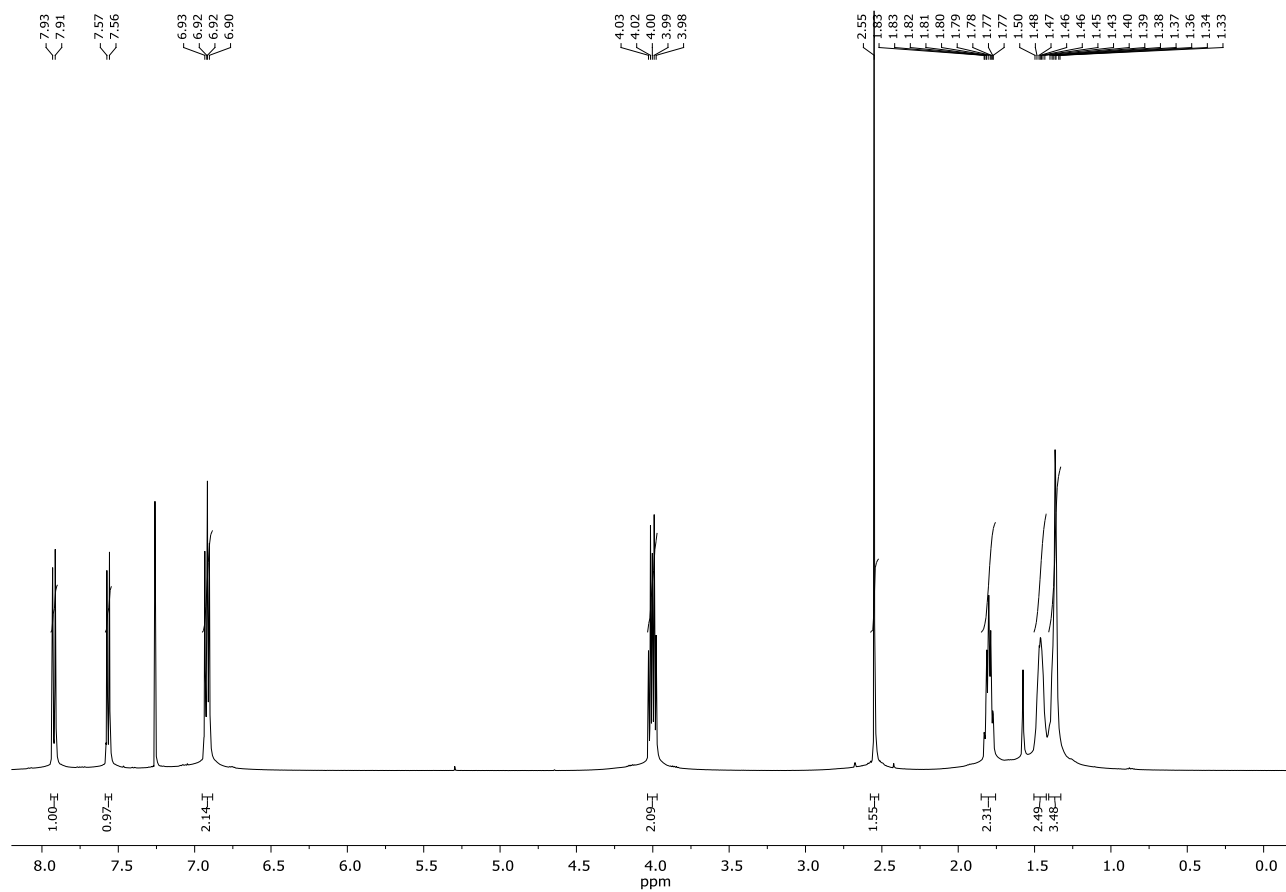

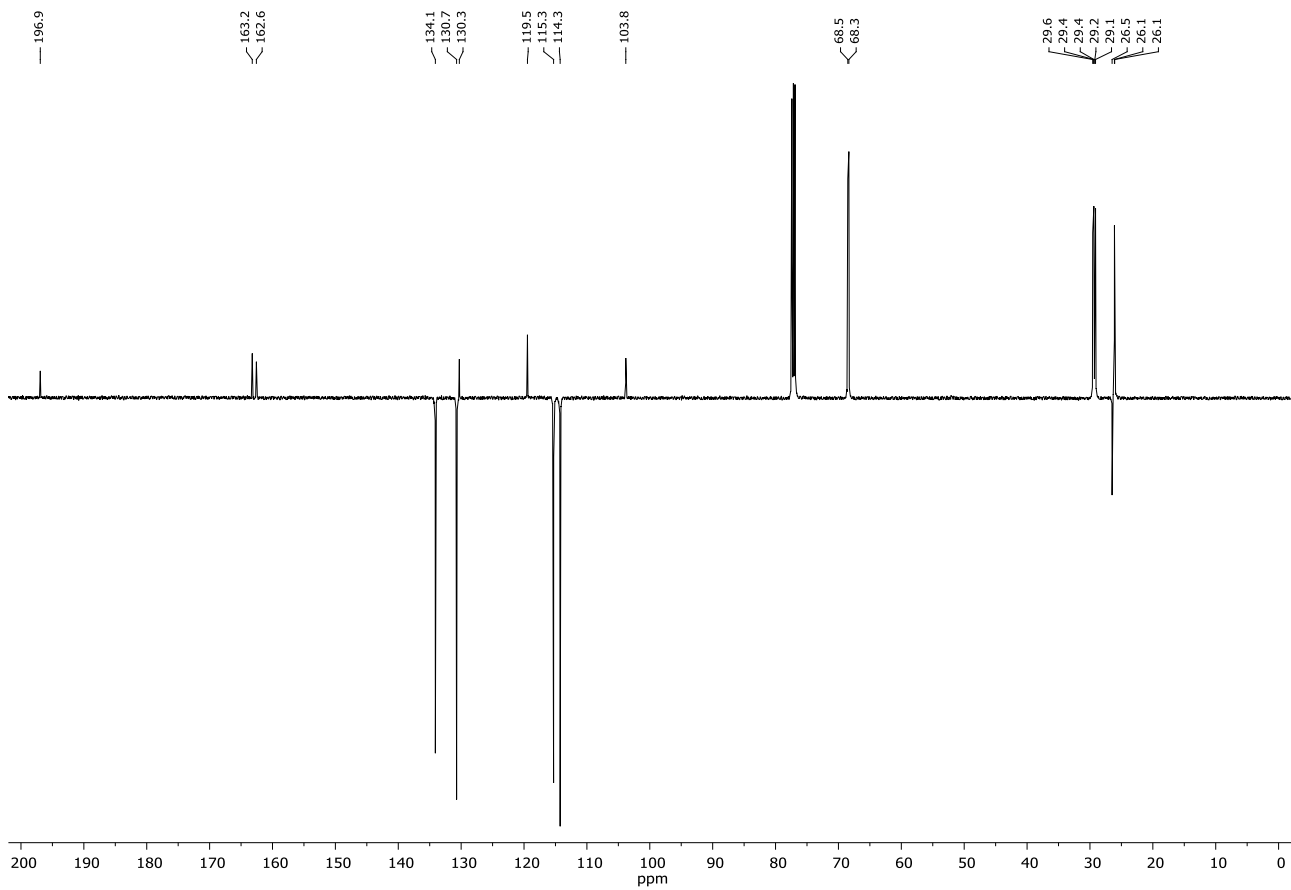

# Compound 9e

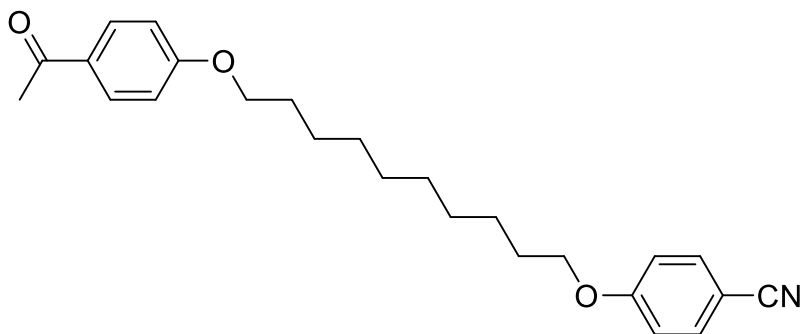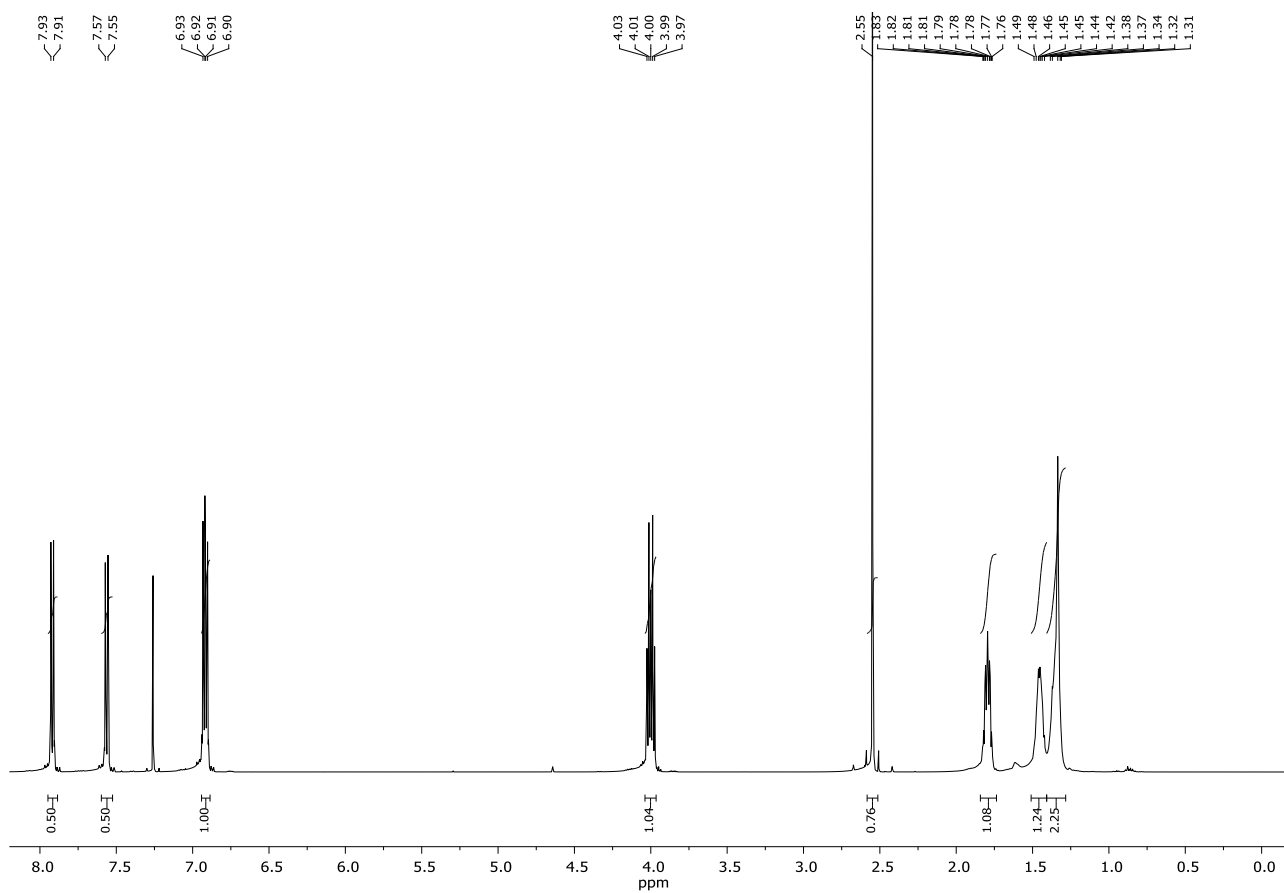

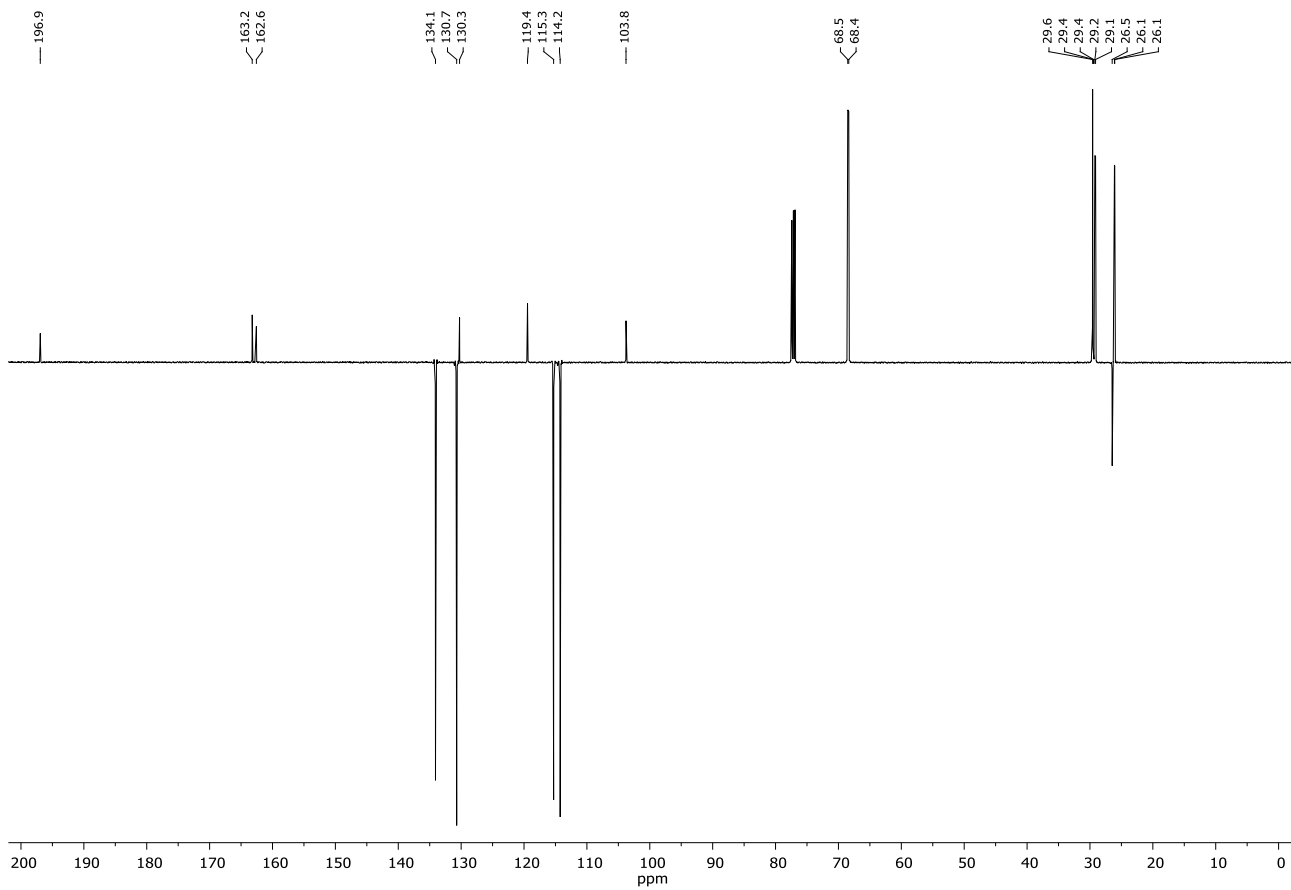

# Compound 9f

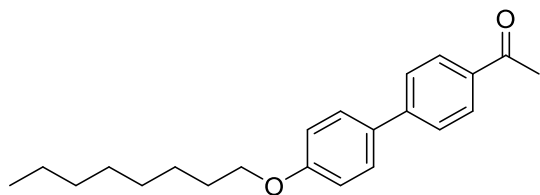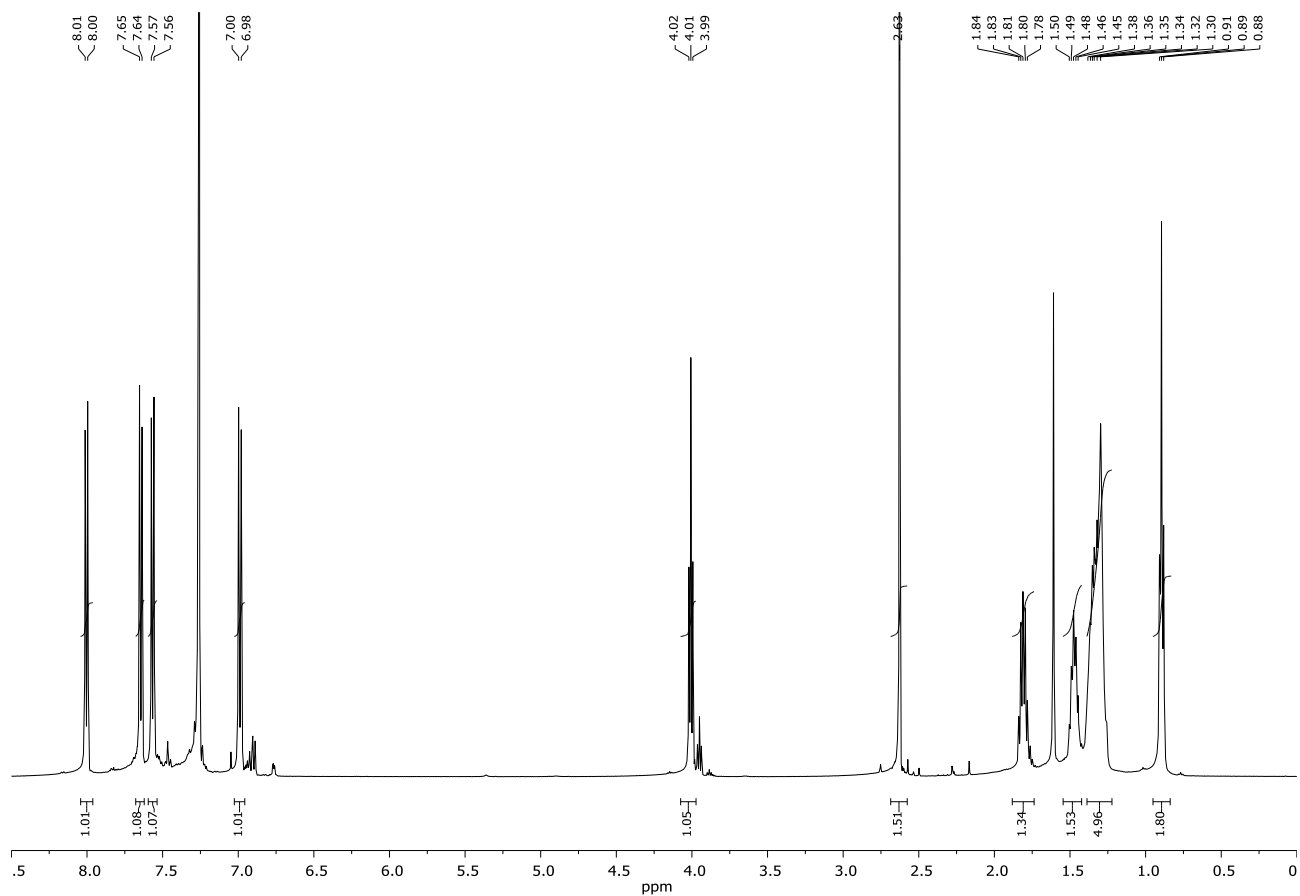

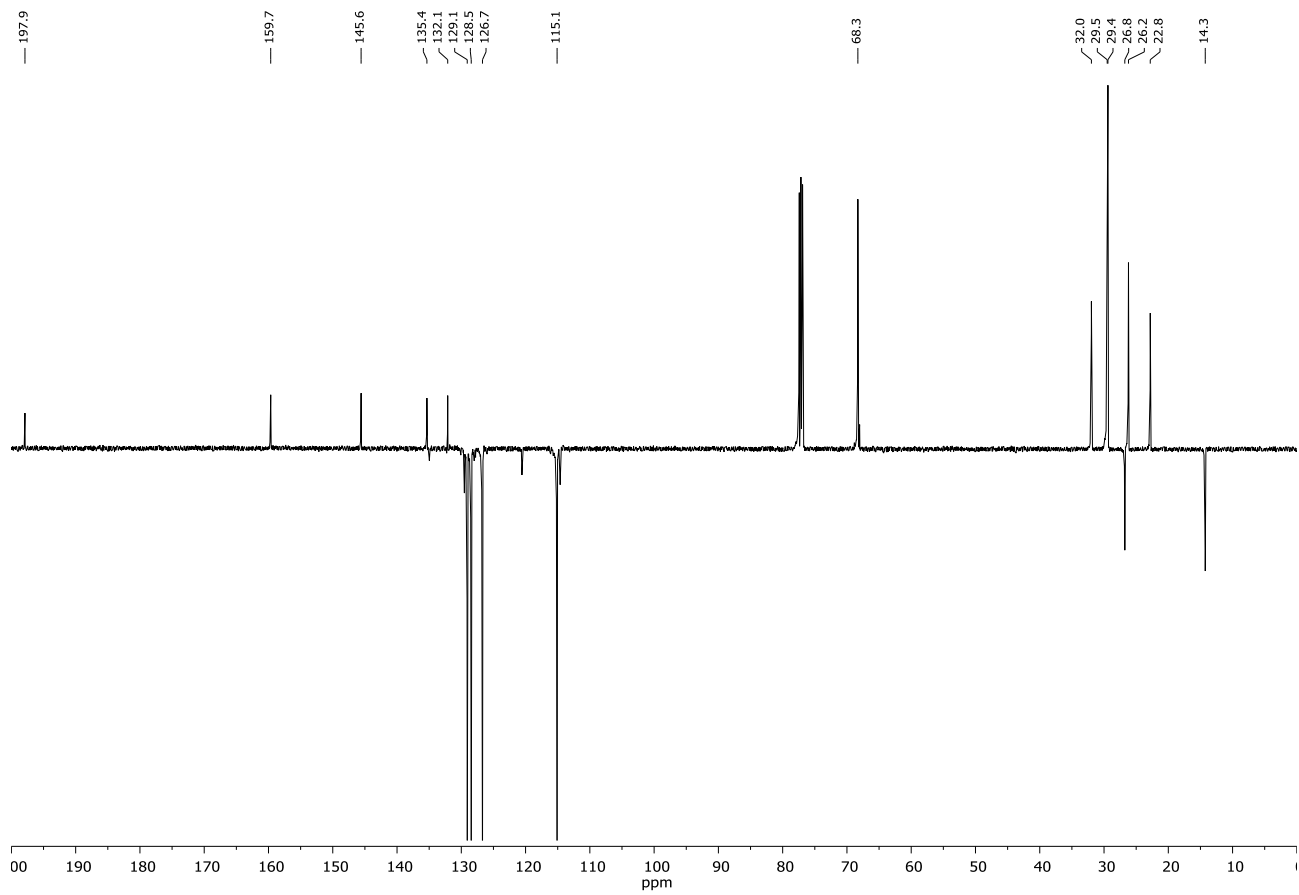

# Compound 9g

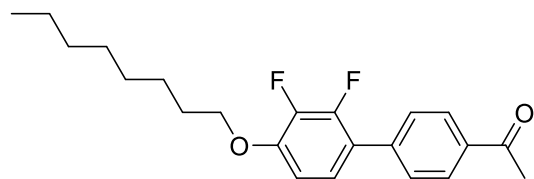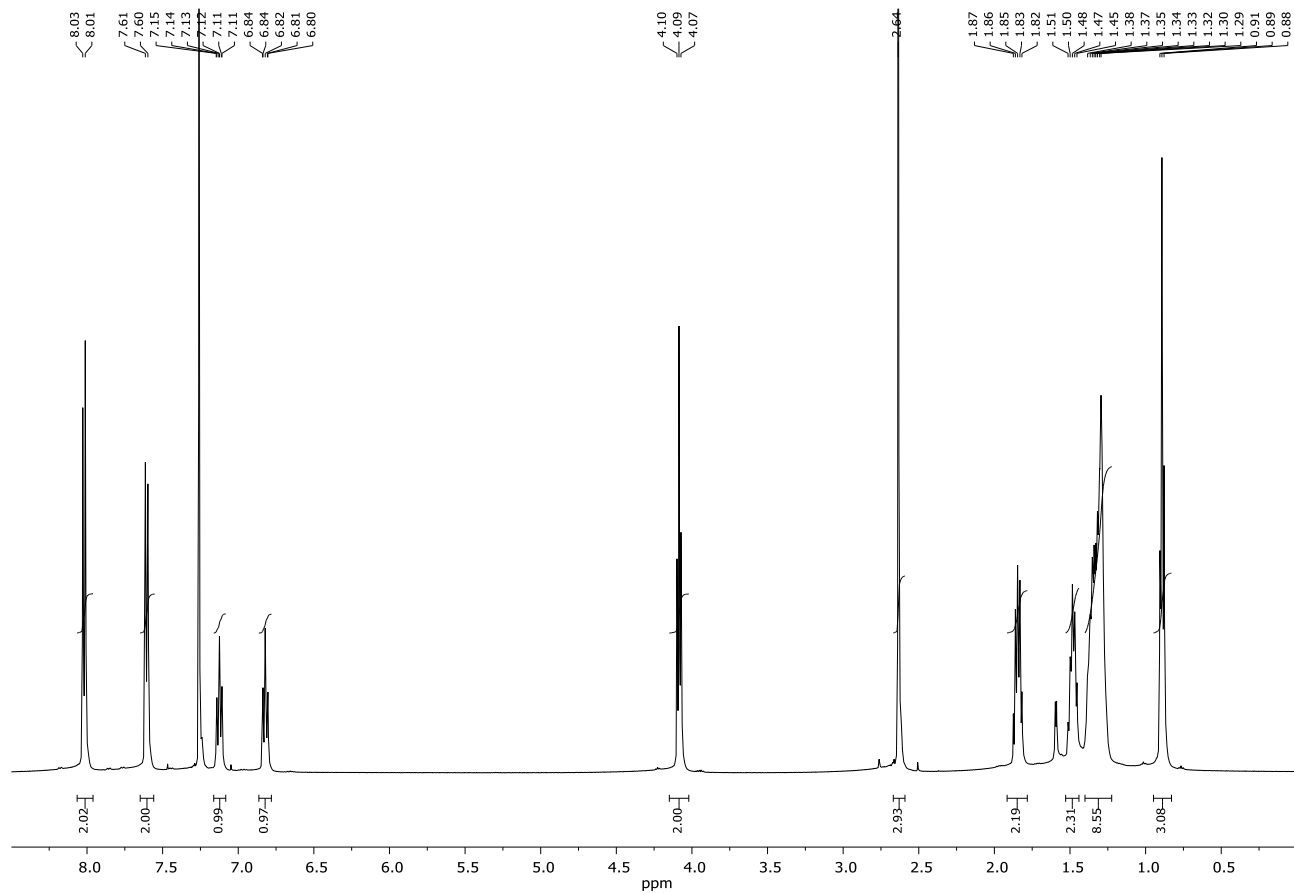



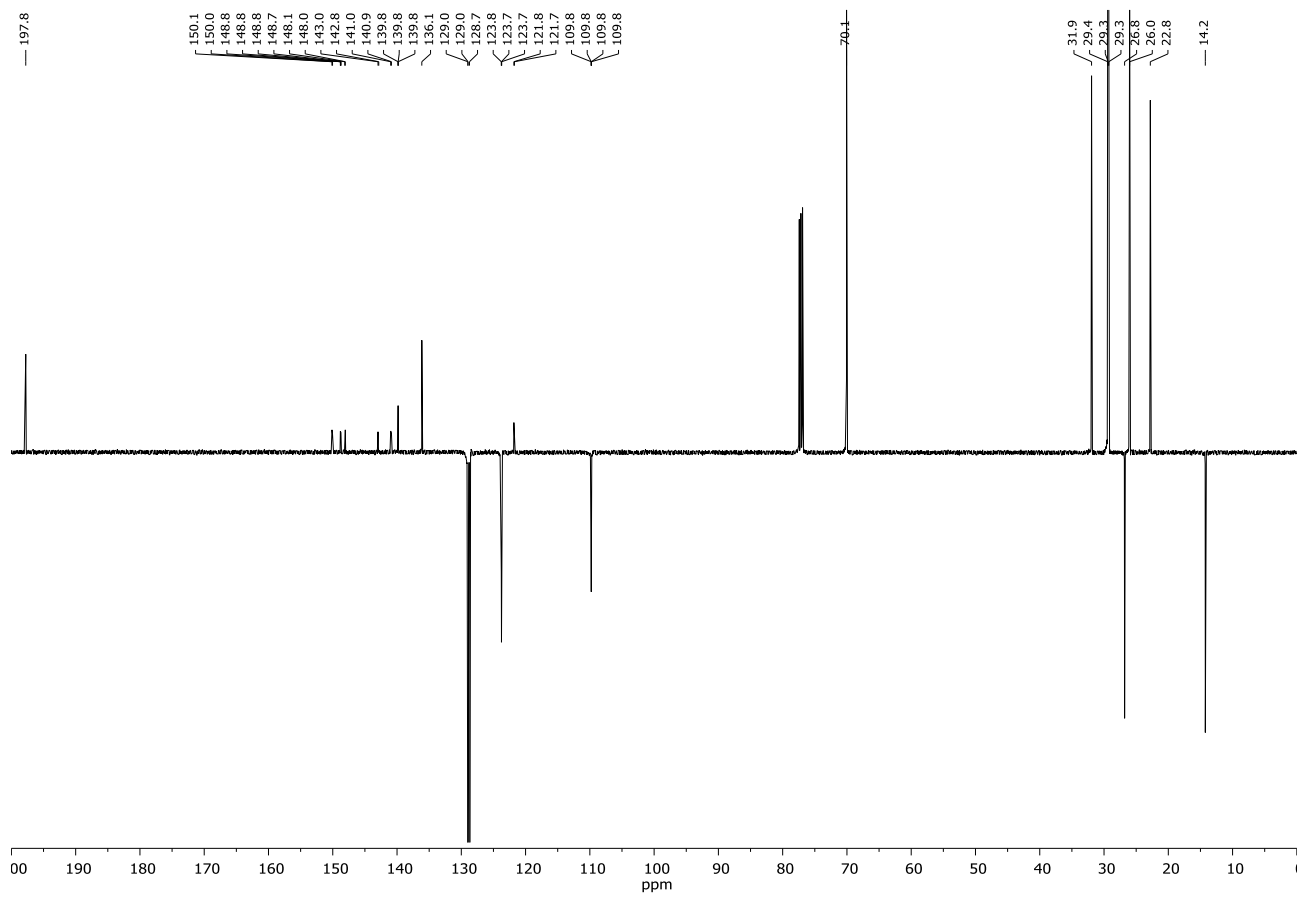

# Compound 9h

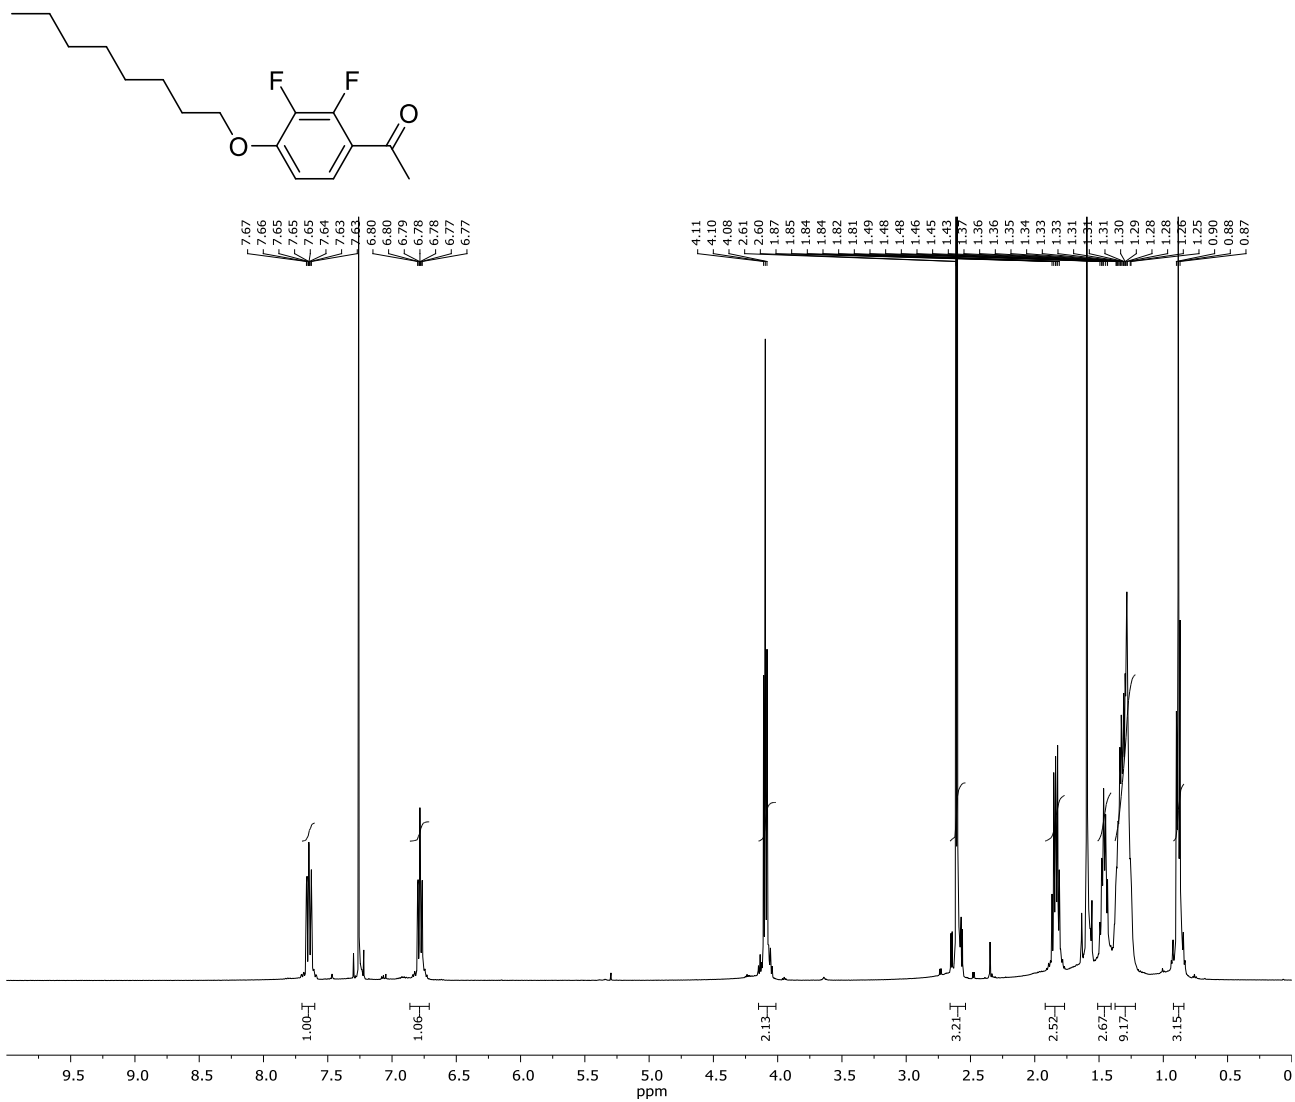

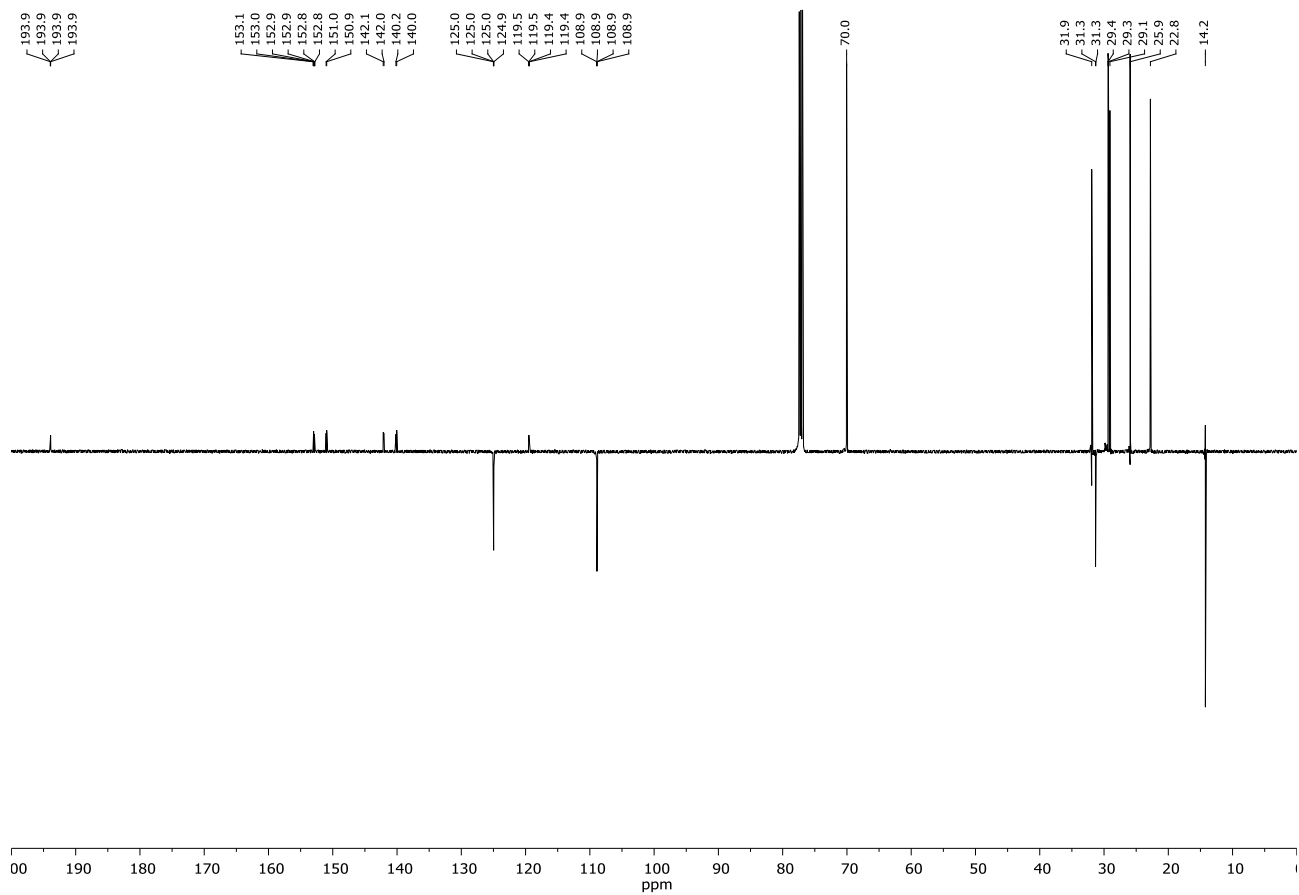

# Compound 13a

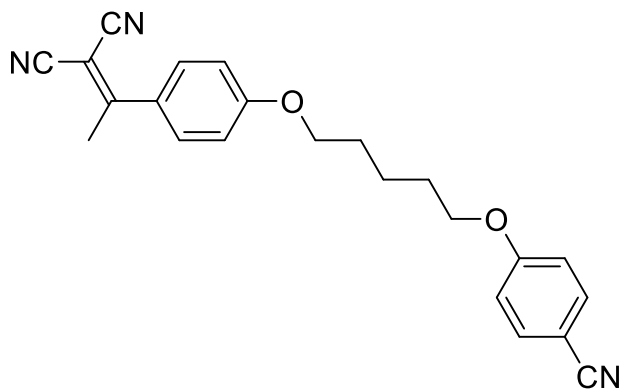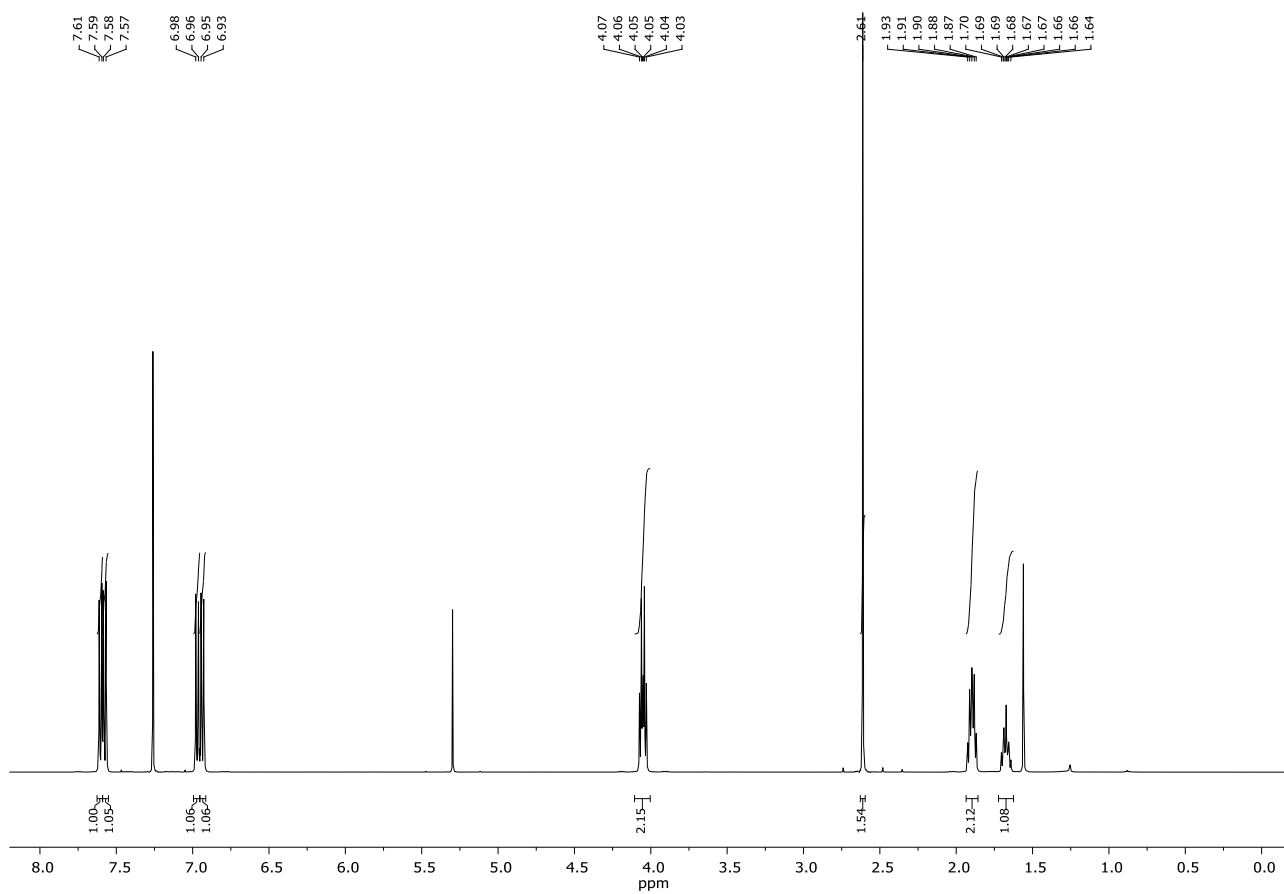

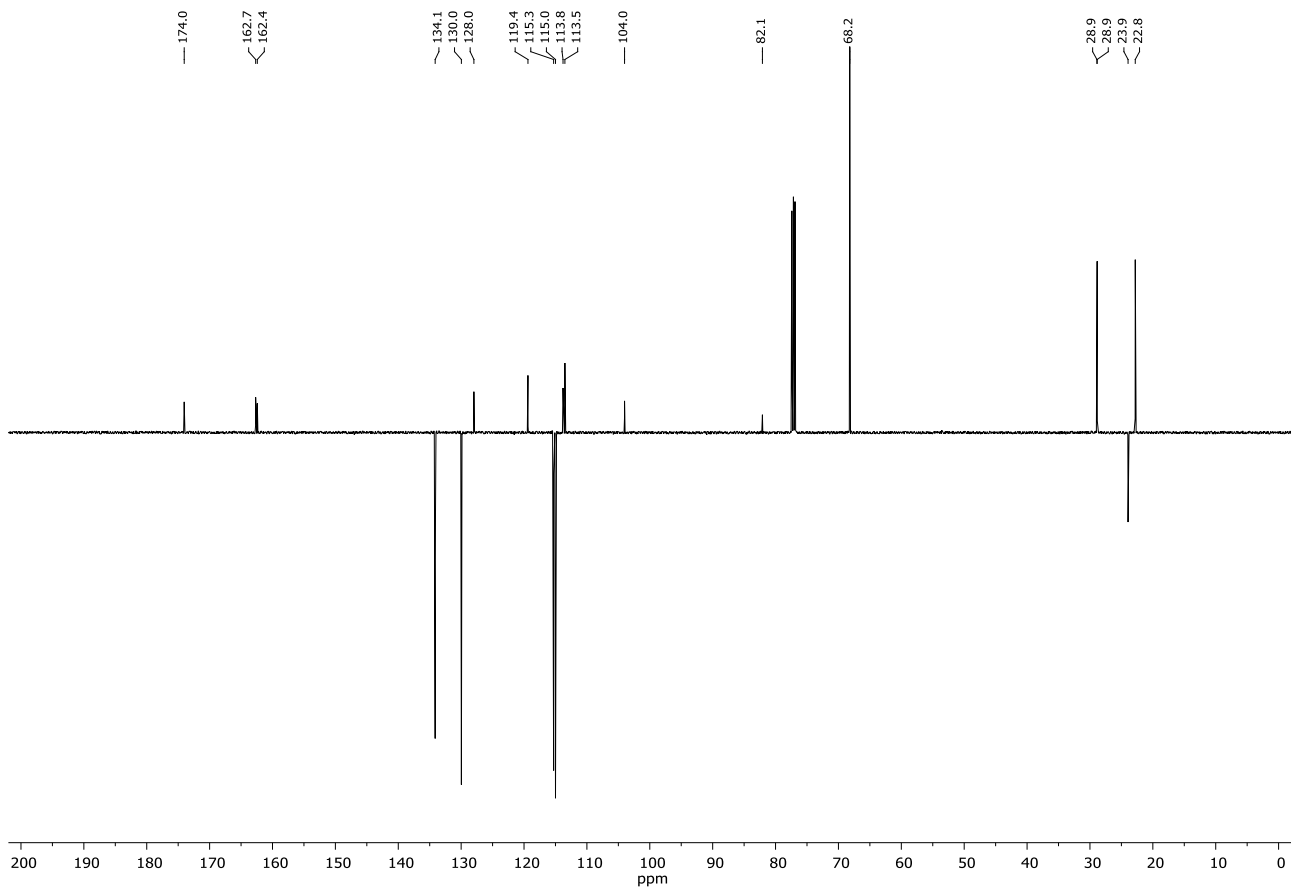

# Compound 13b

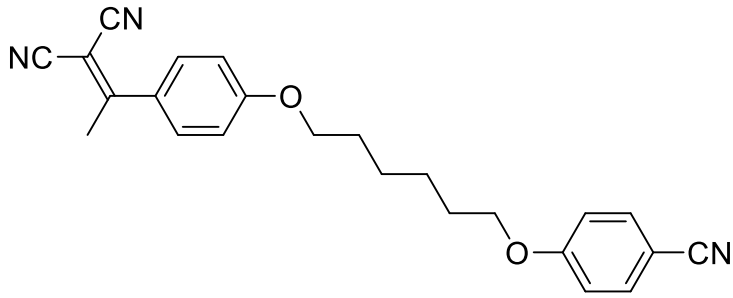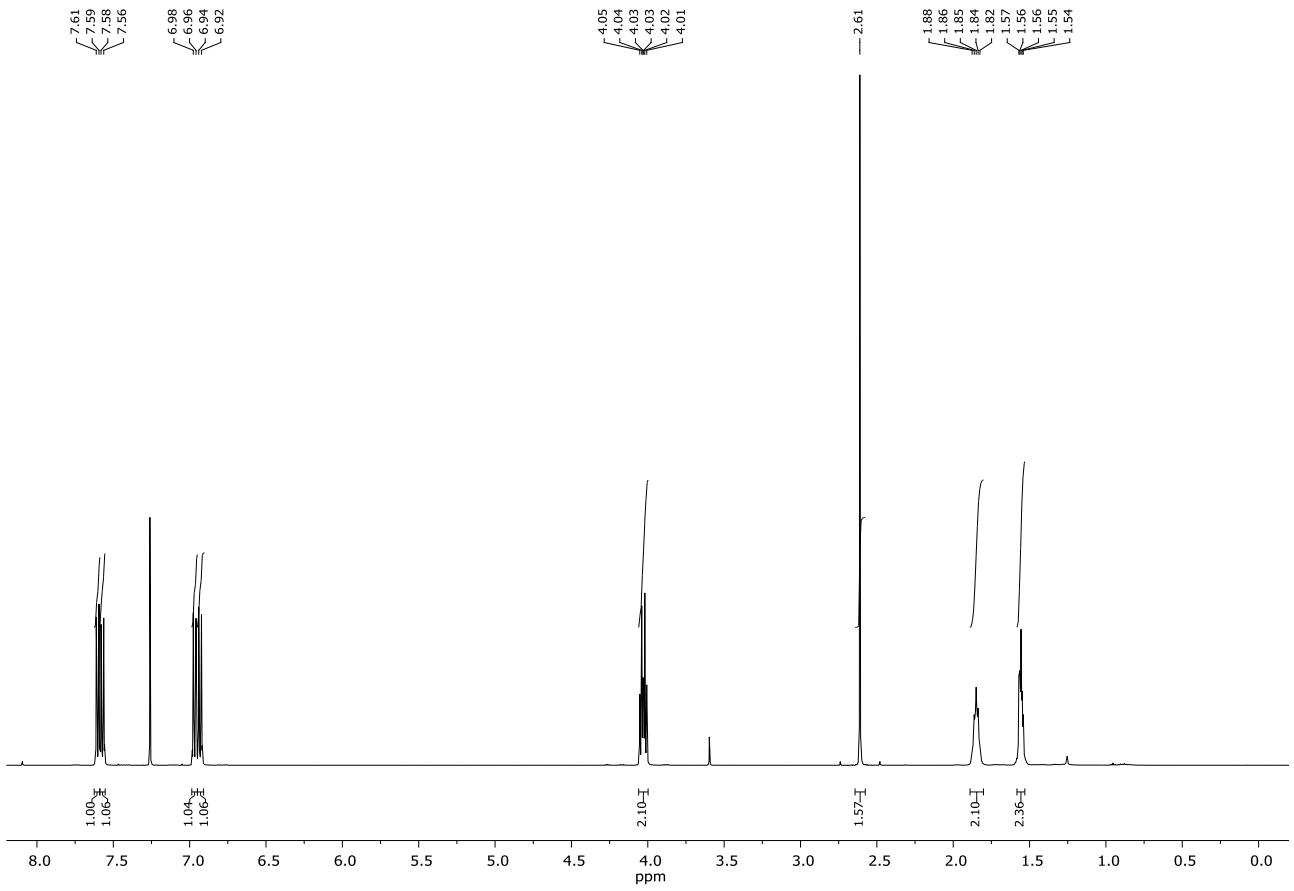

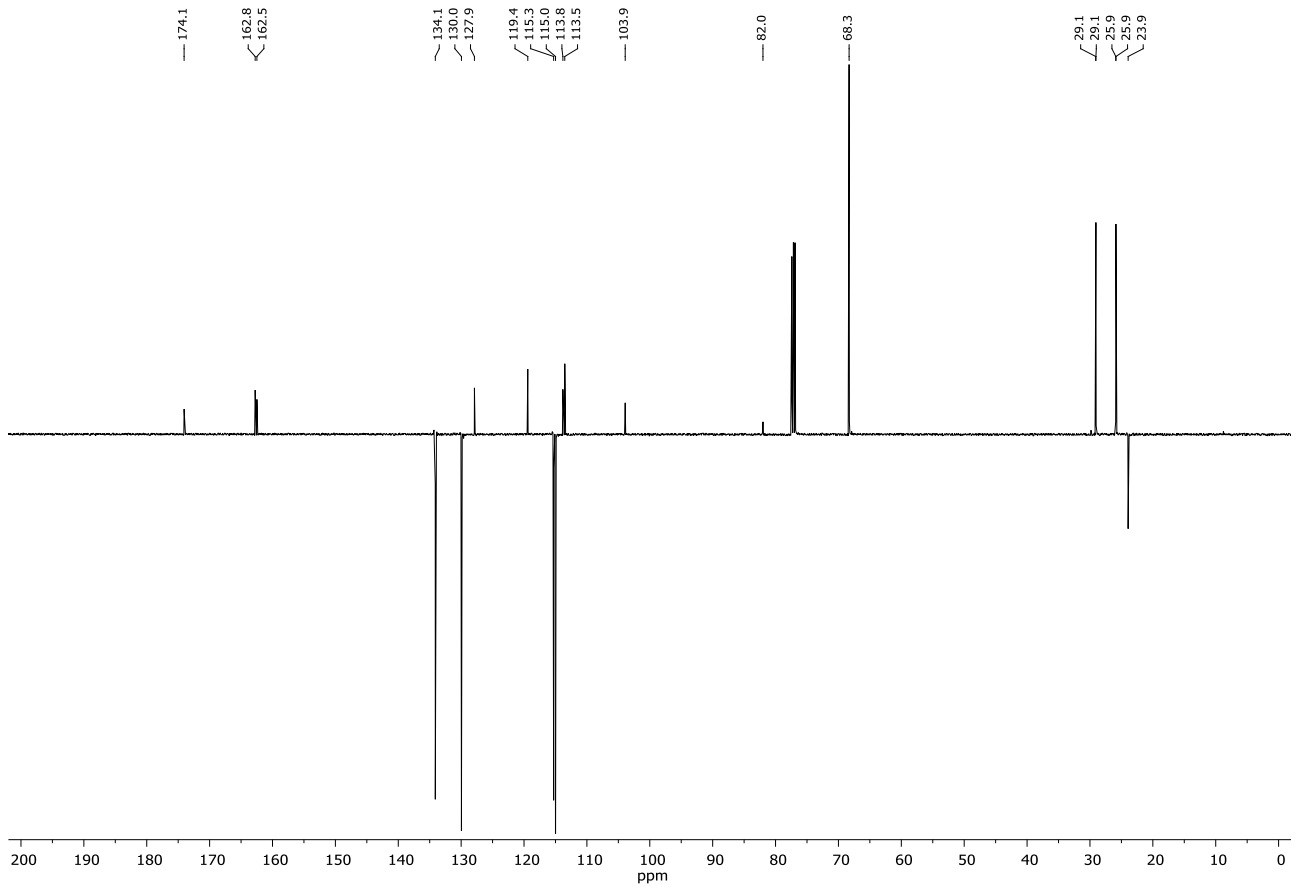

# Compound 13c

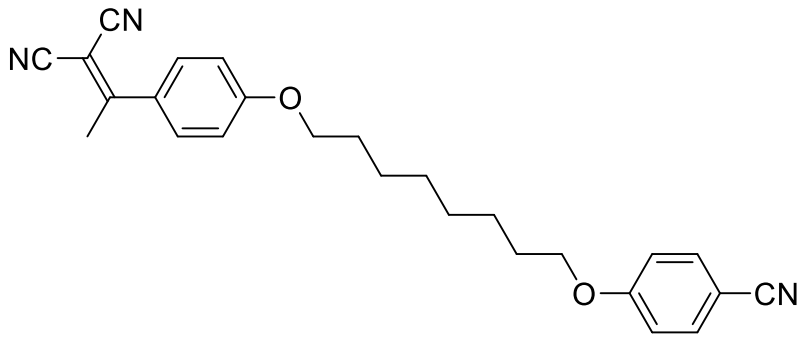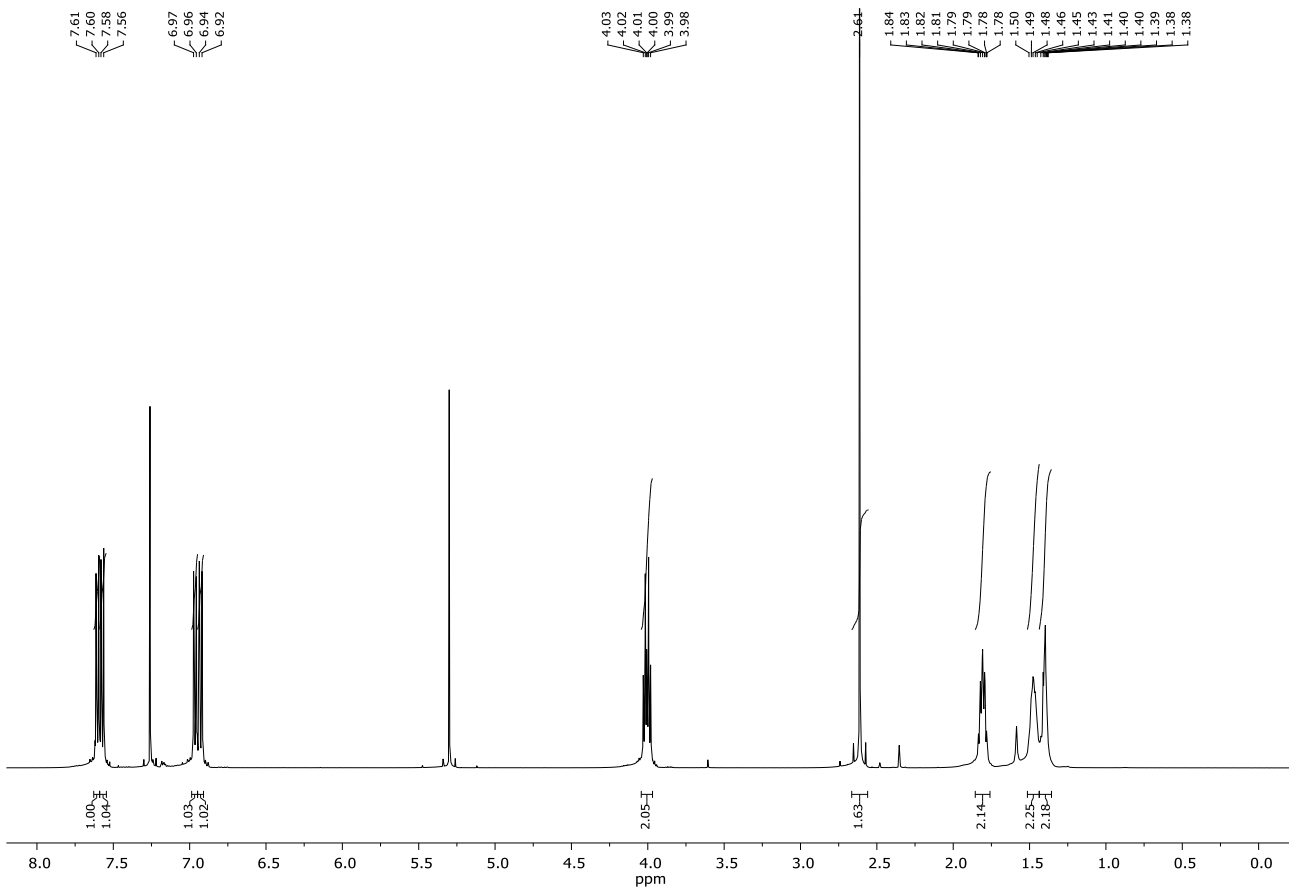



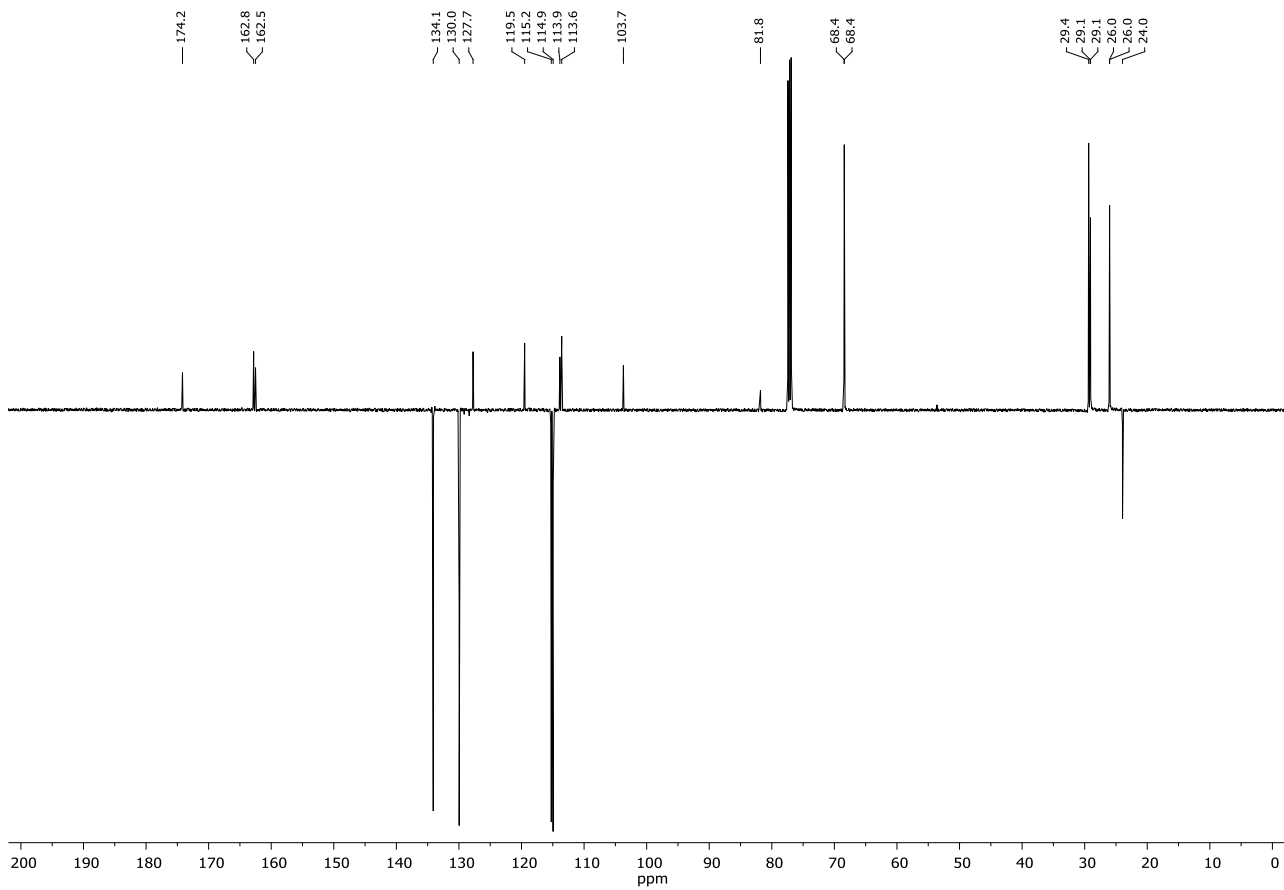

# Compound 13d

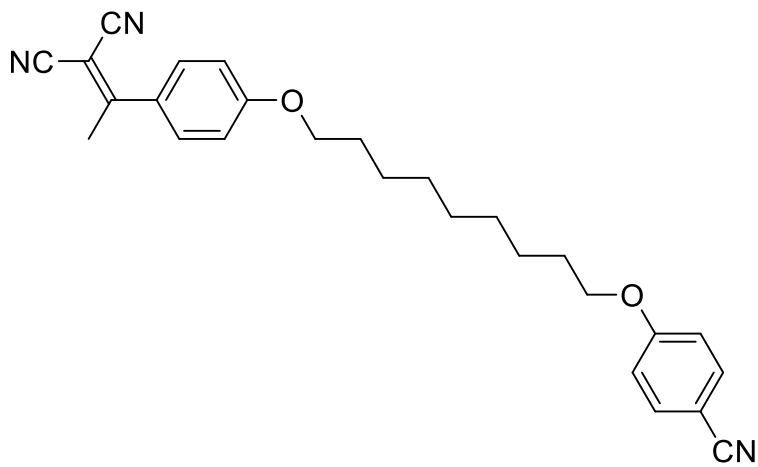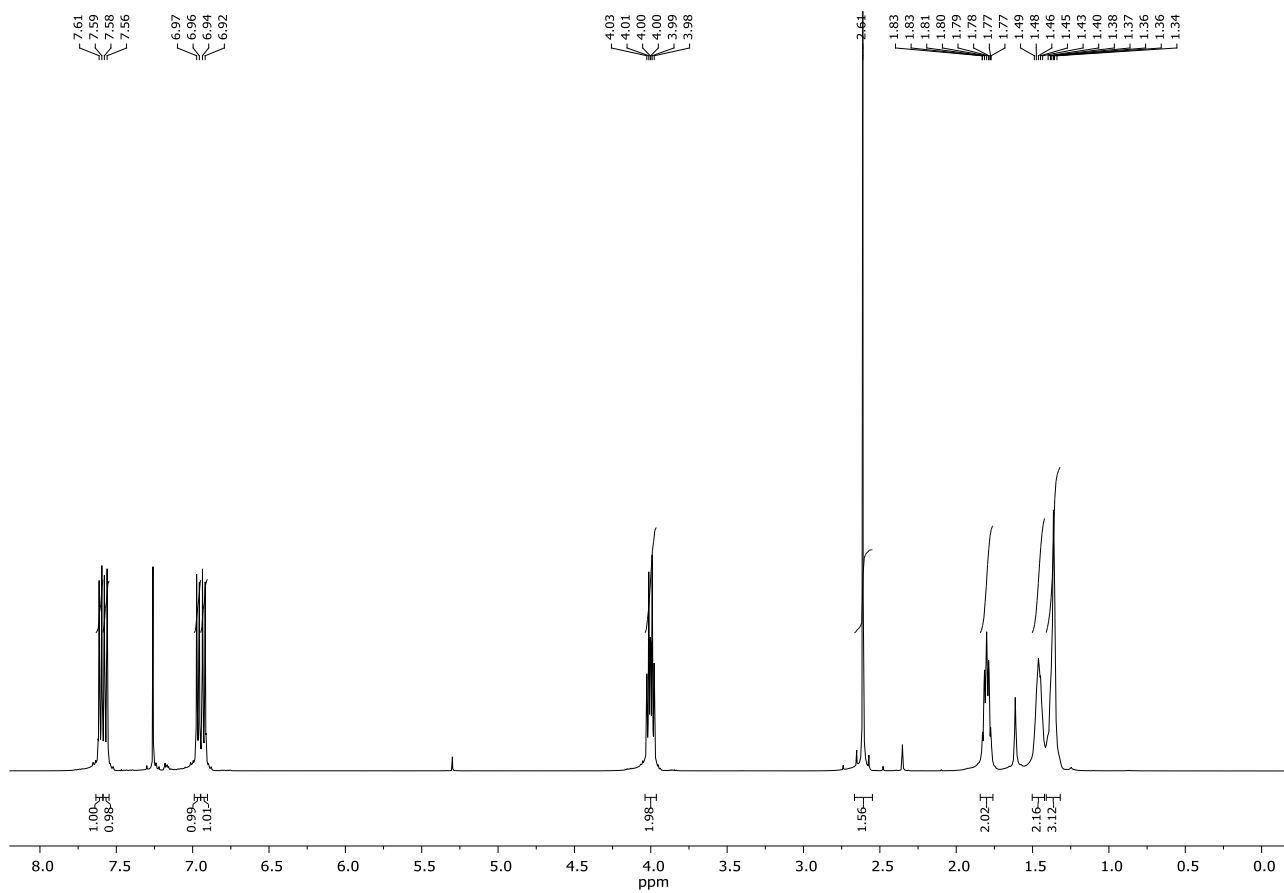

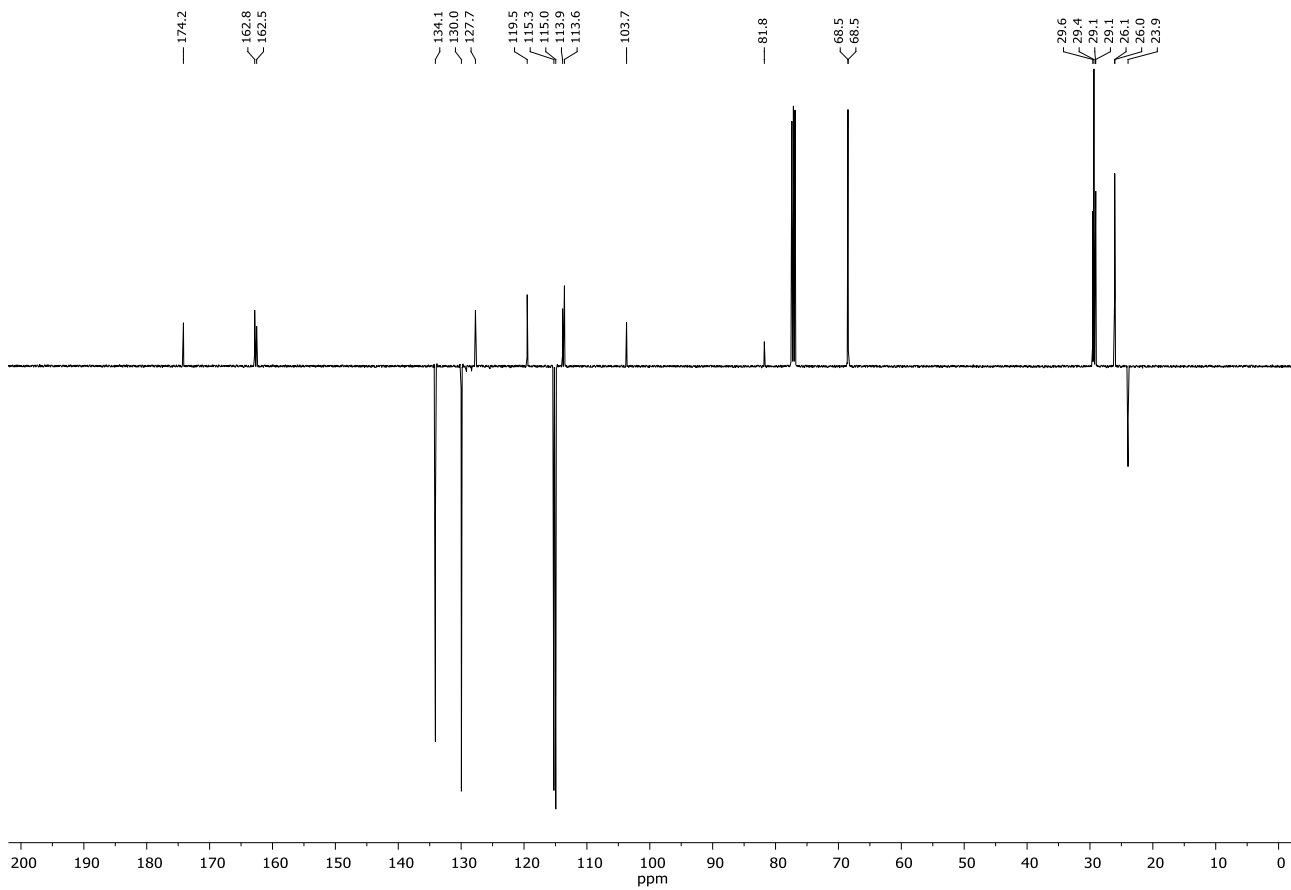

# Compound 13e

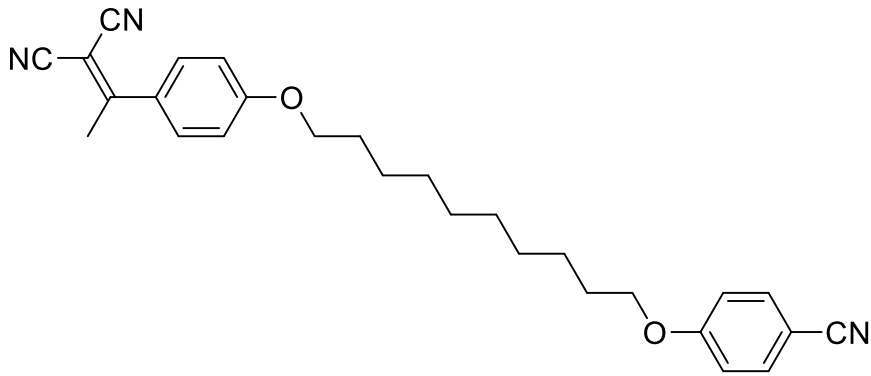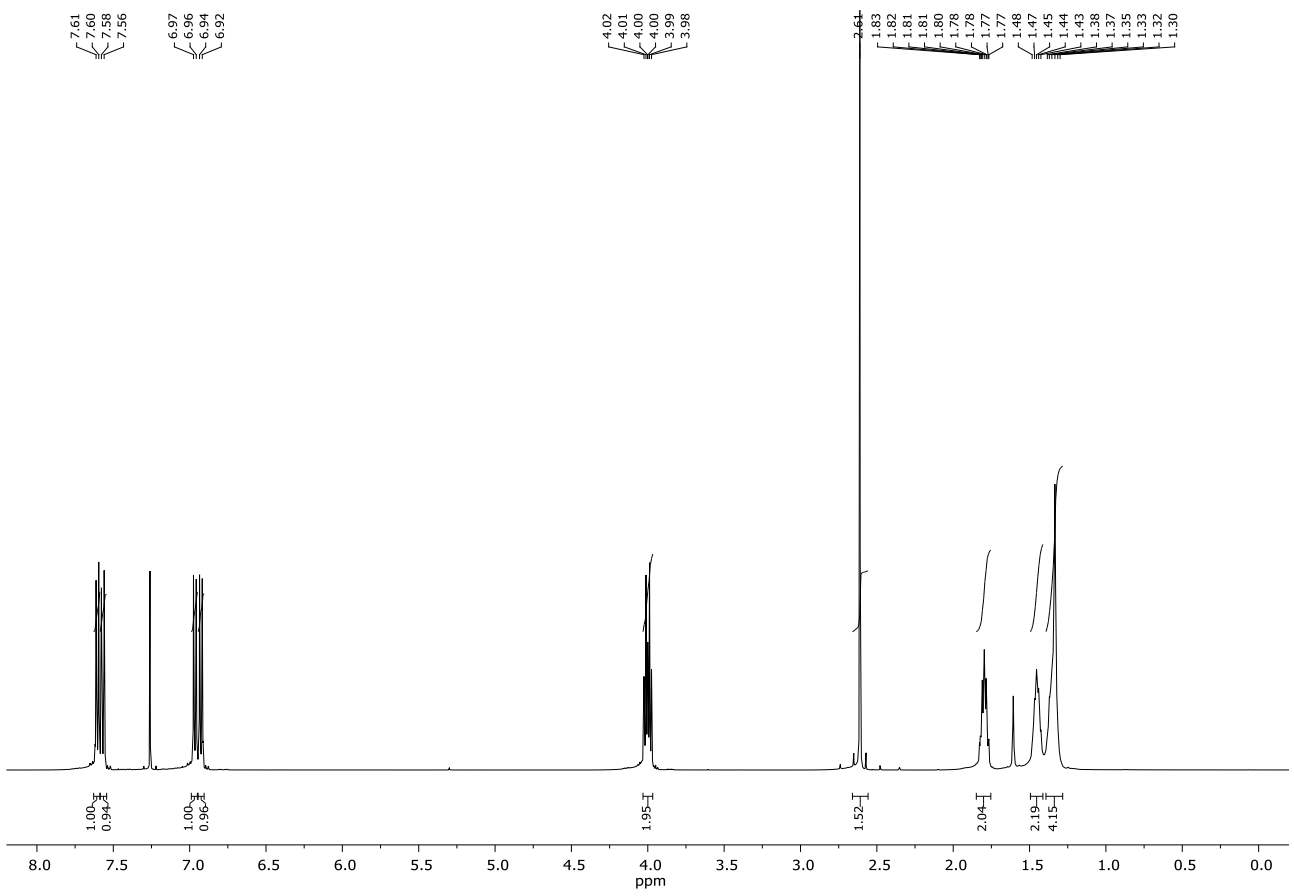

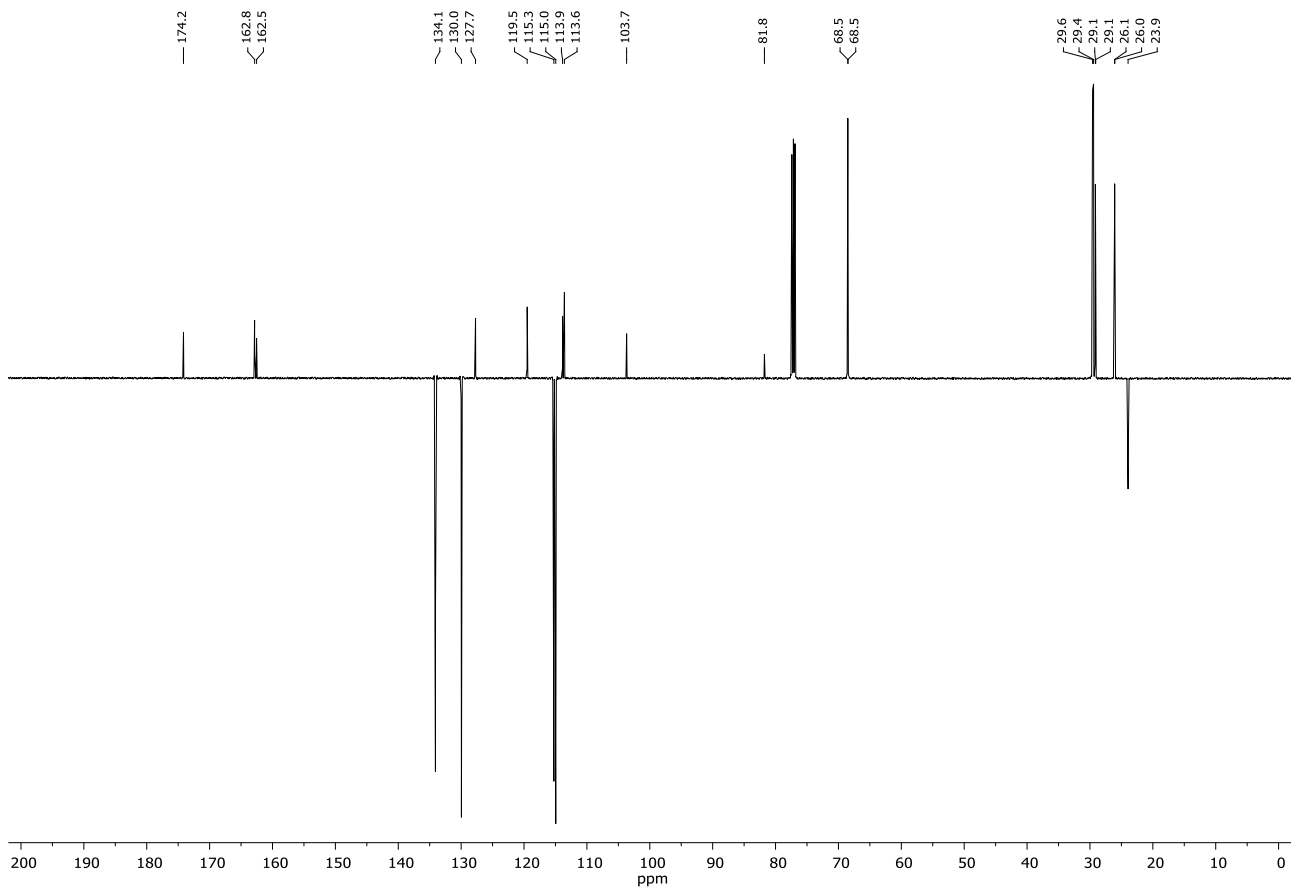

# Compound 13f

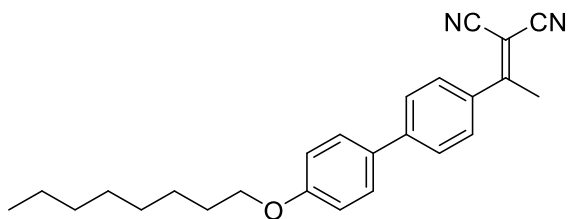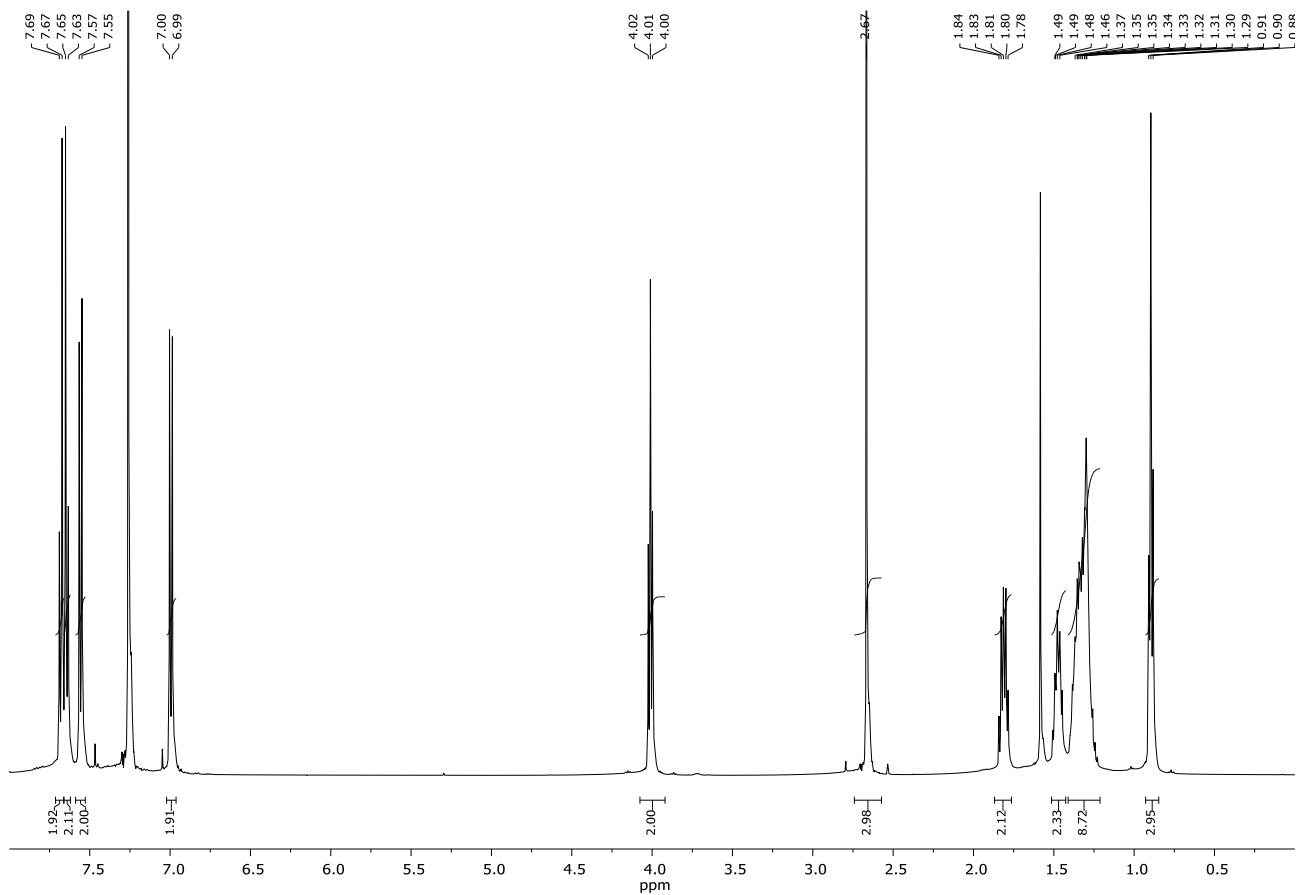

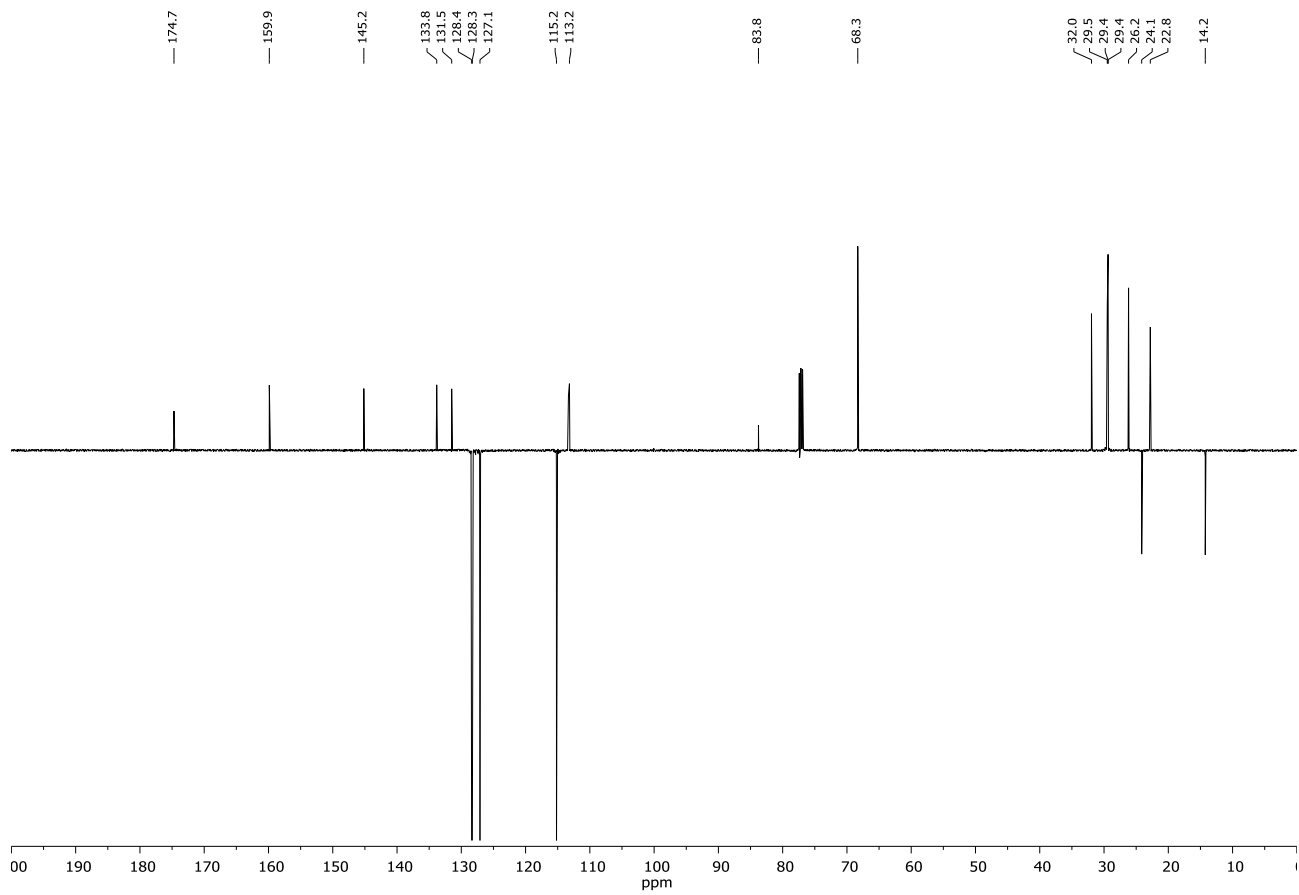

# Compound 13g

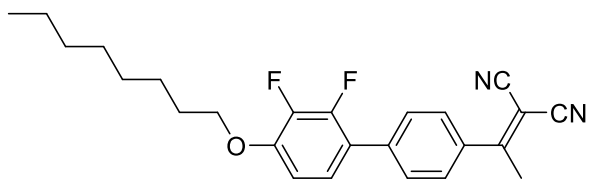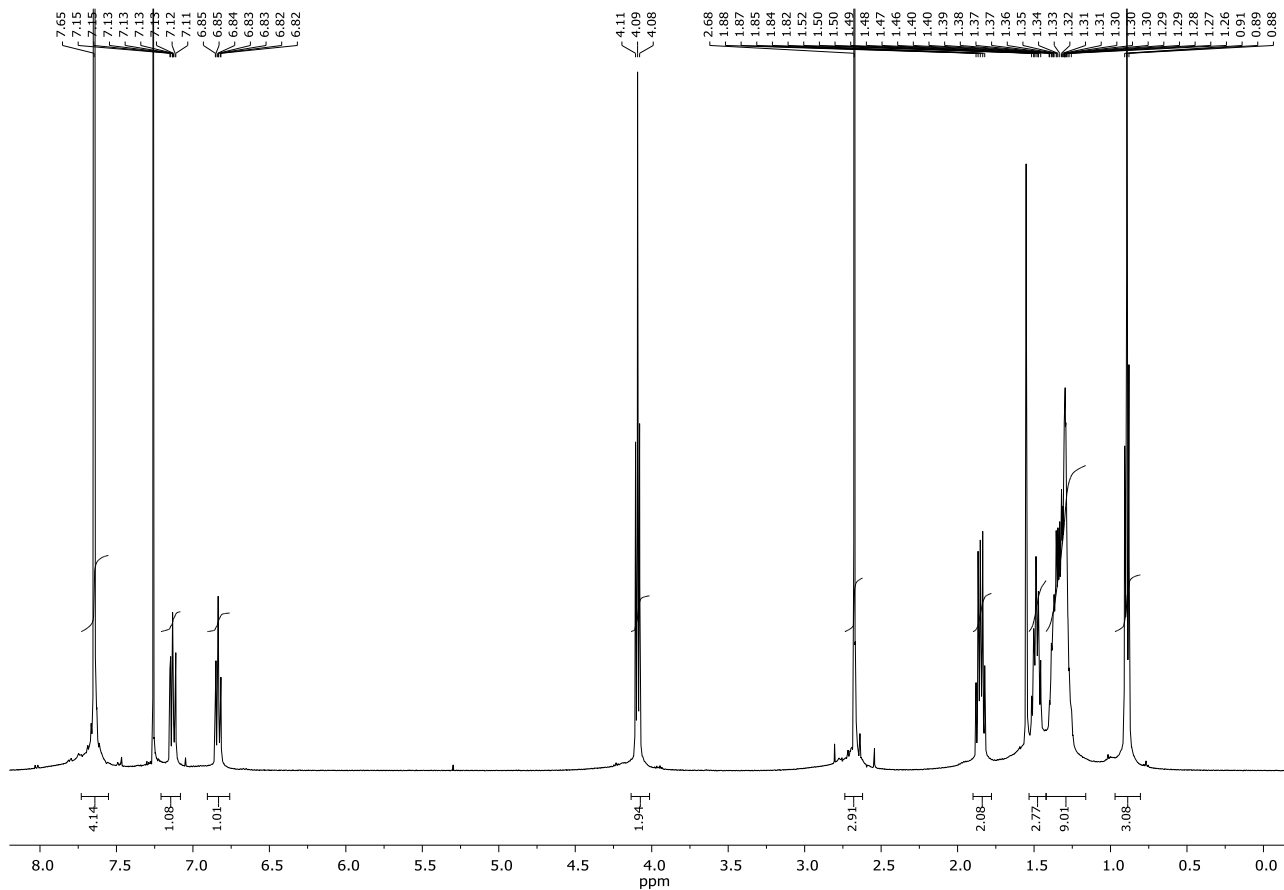



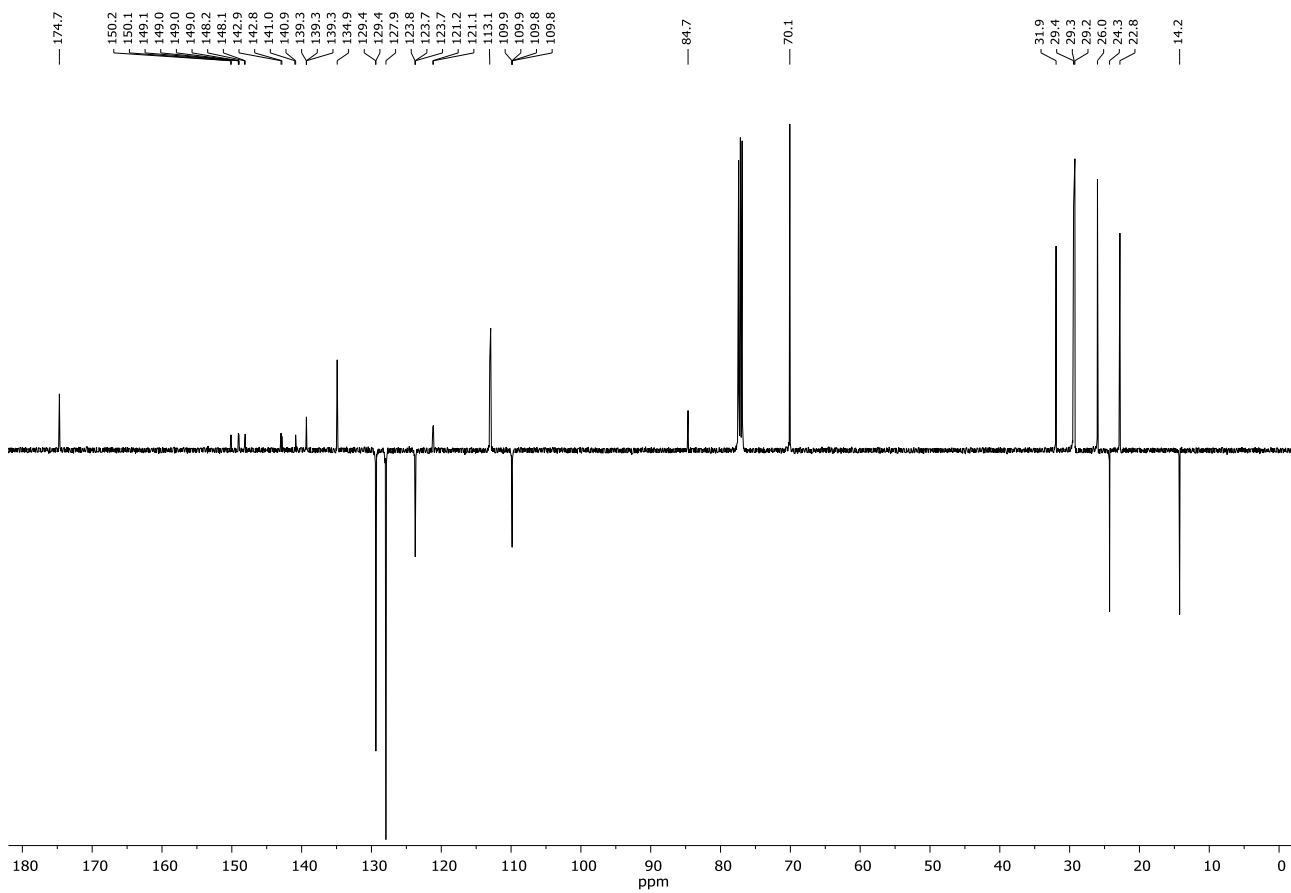

# Compound 13h

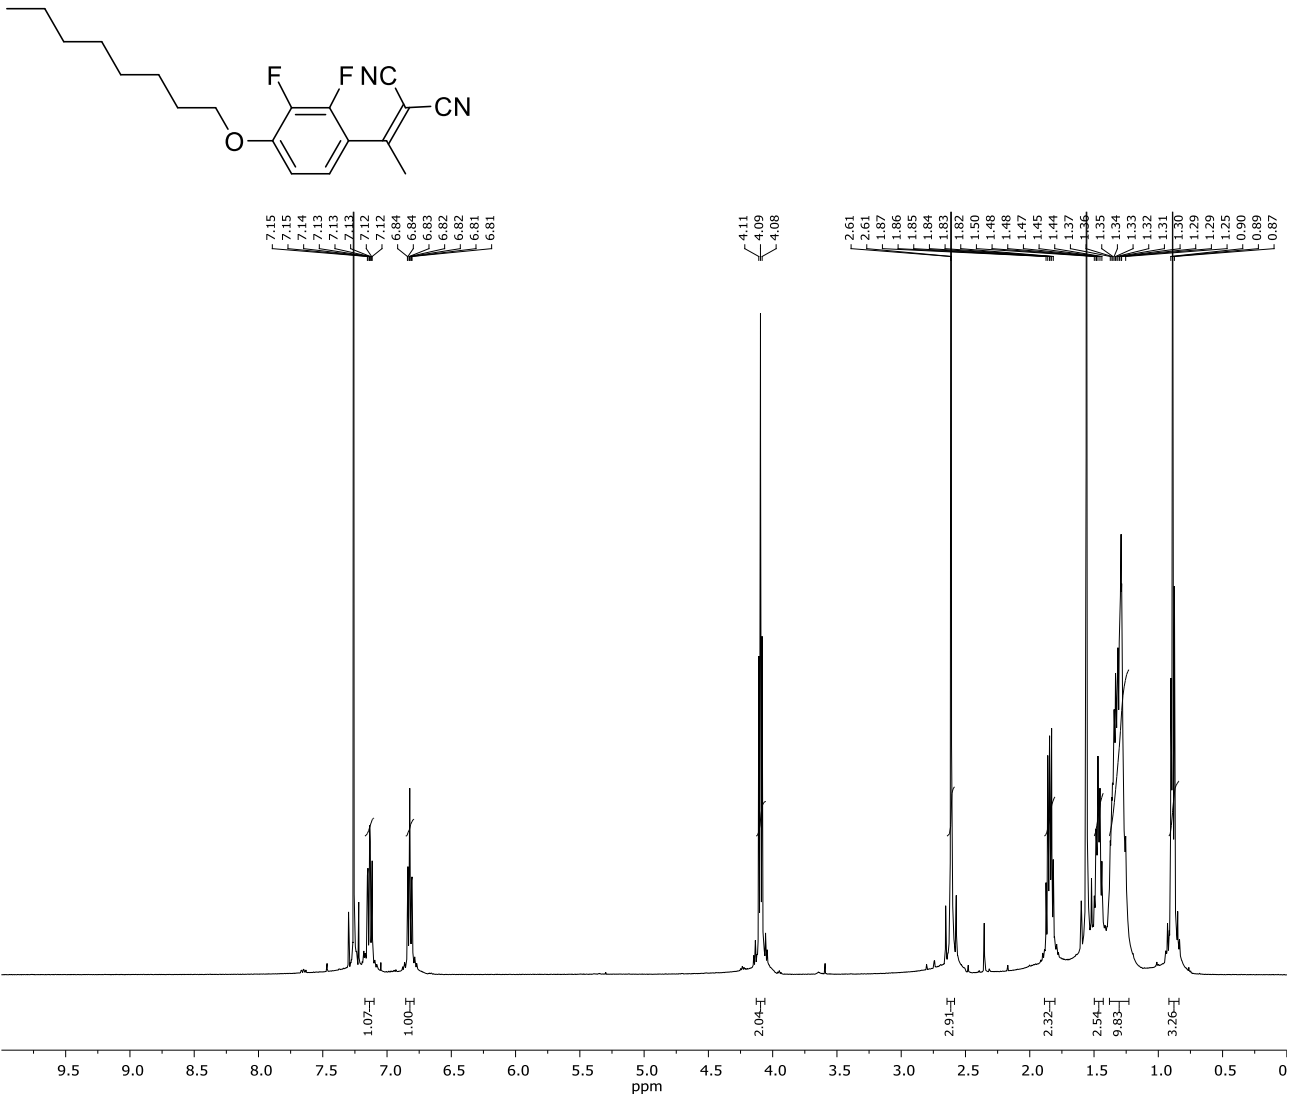

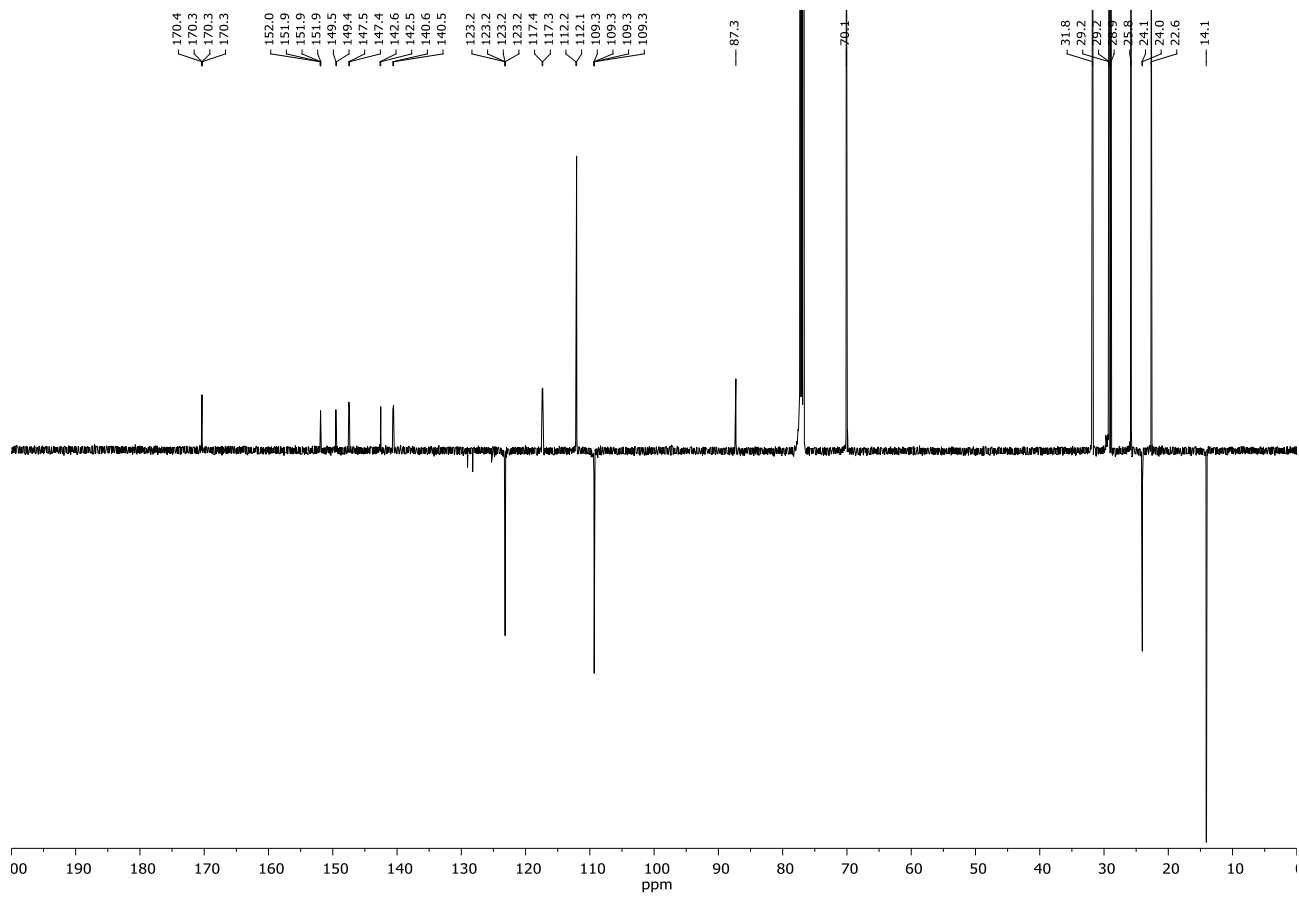

# Compound 13i

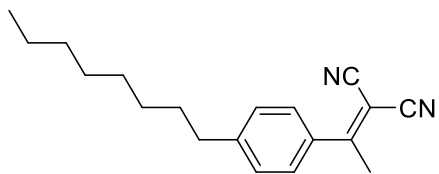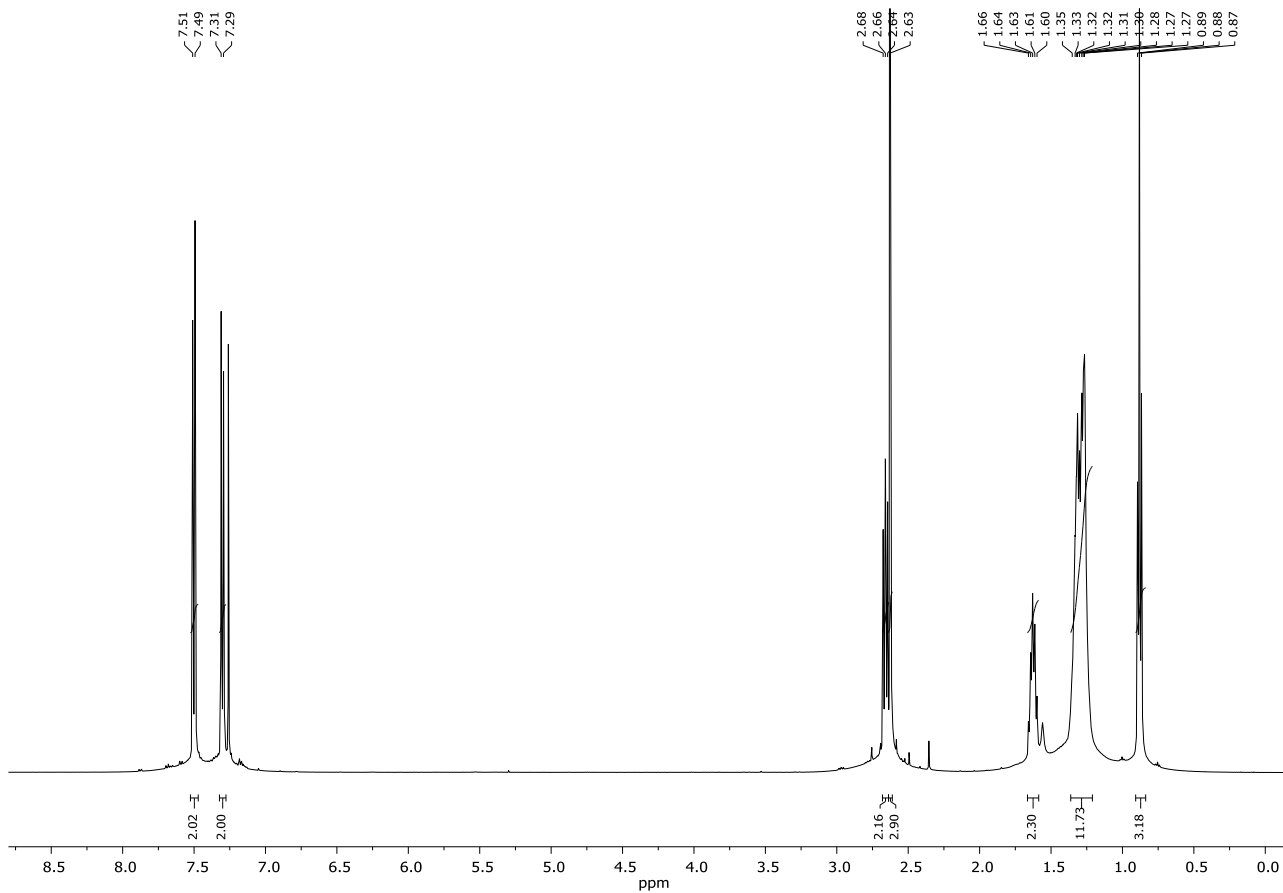

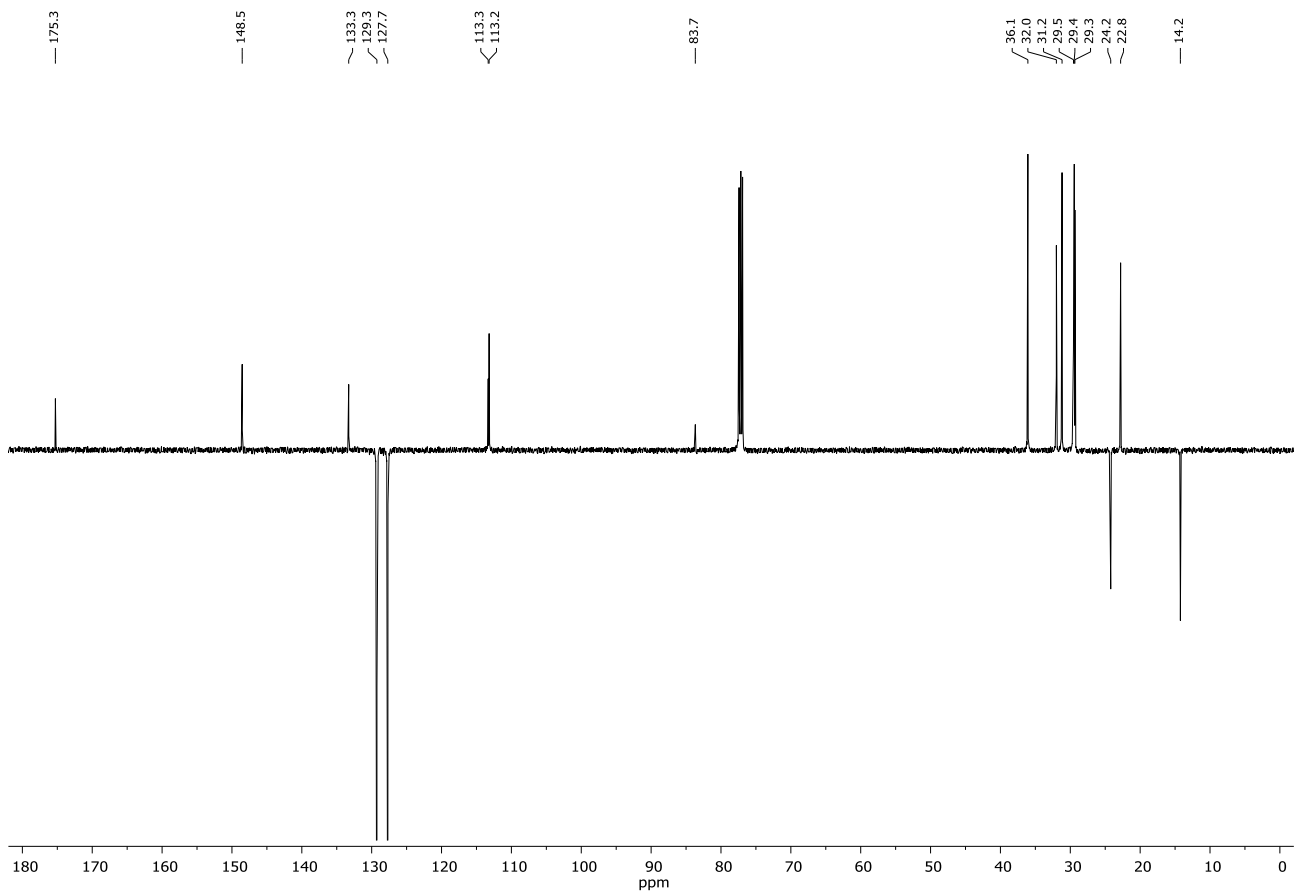

# Compound 3a

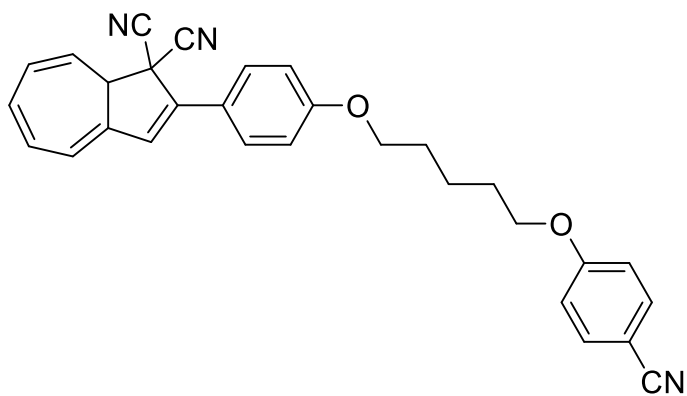

7.68  
7.66  
7.59  
7.57  
6.97  
6.95  
6.93  
6.76  
6.57  
6.56  
6.55  
6.54  
6.46  
6.45  
6.44  
6.43  
6.31  
6.30  
6.30  
6.29  
6.28  
5.82  
5.81  
5.80  
5.79

4.06  
4.05  
4.05  
4.04  
4.03  
4.03  
3.78  
3.77  
3.77  
3.76

1.93  
1.92  
1.91  
1.91  
1.89  
1.88  
1.88  
1.87  
1.86  
1.70  
1.69  
1.69  
1.68  
1.67  
1.67  
1.66  
1.66  
1.64

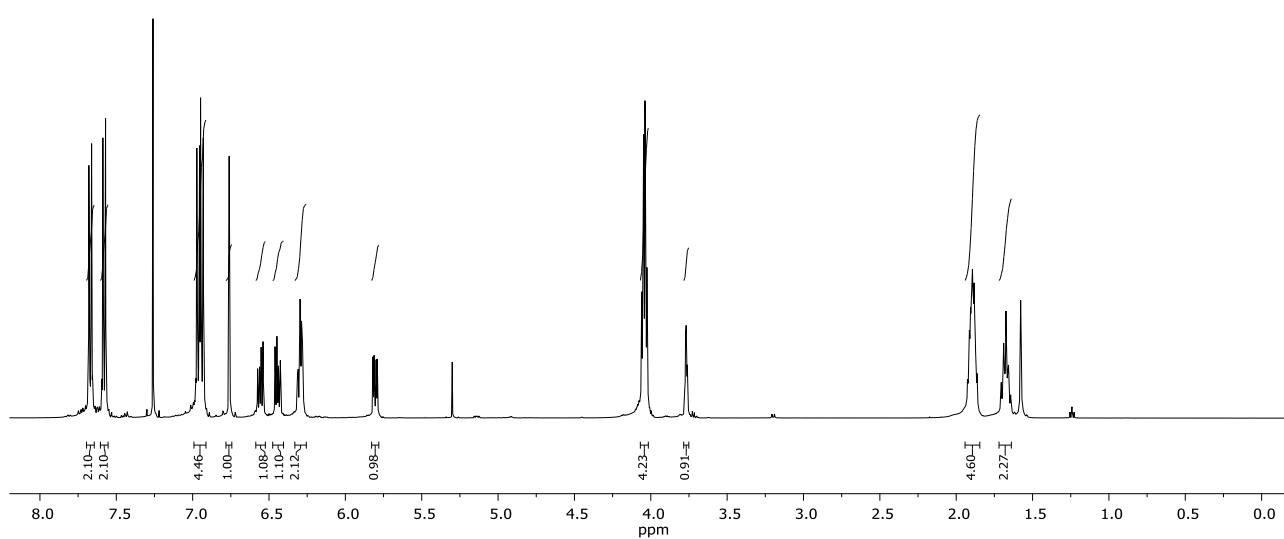

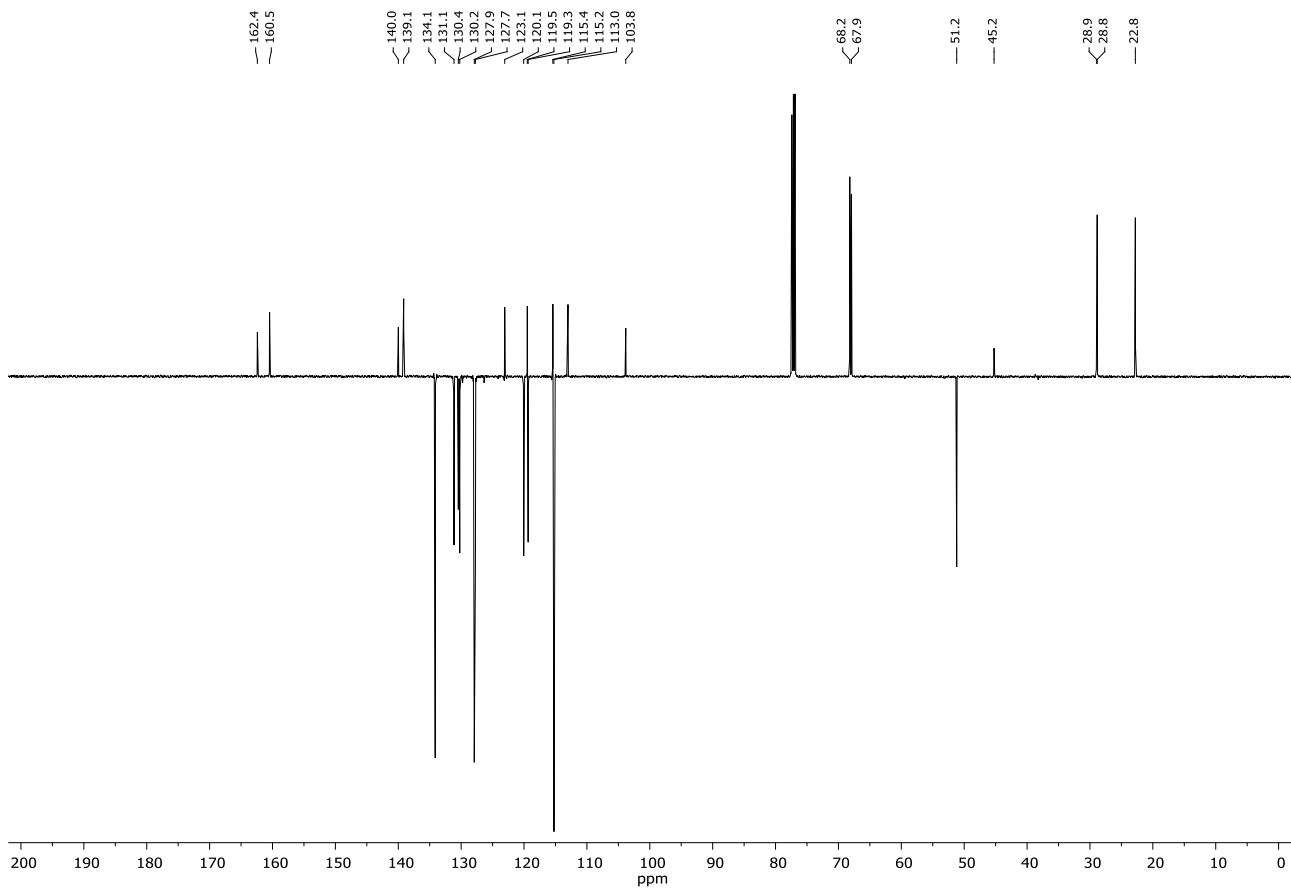

# Compound 3b

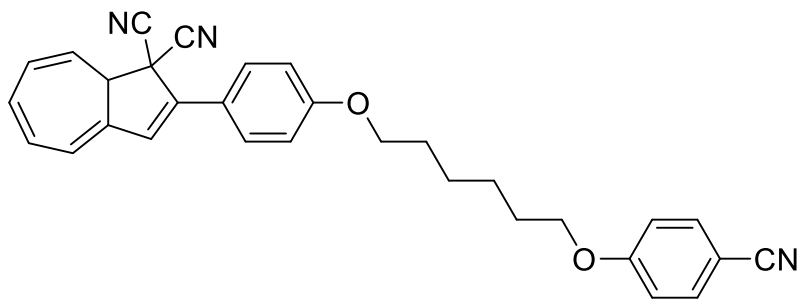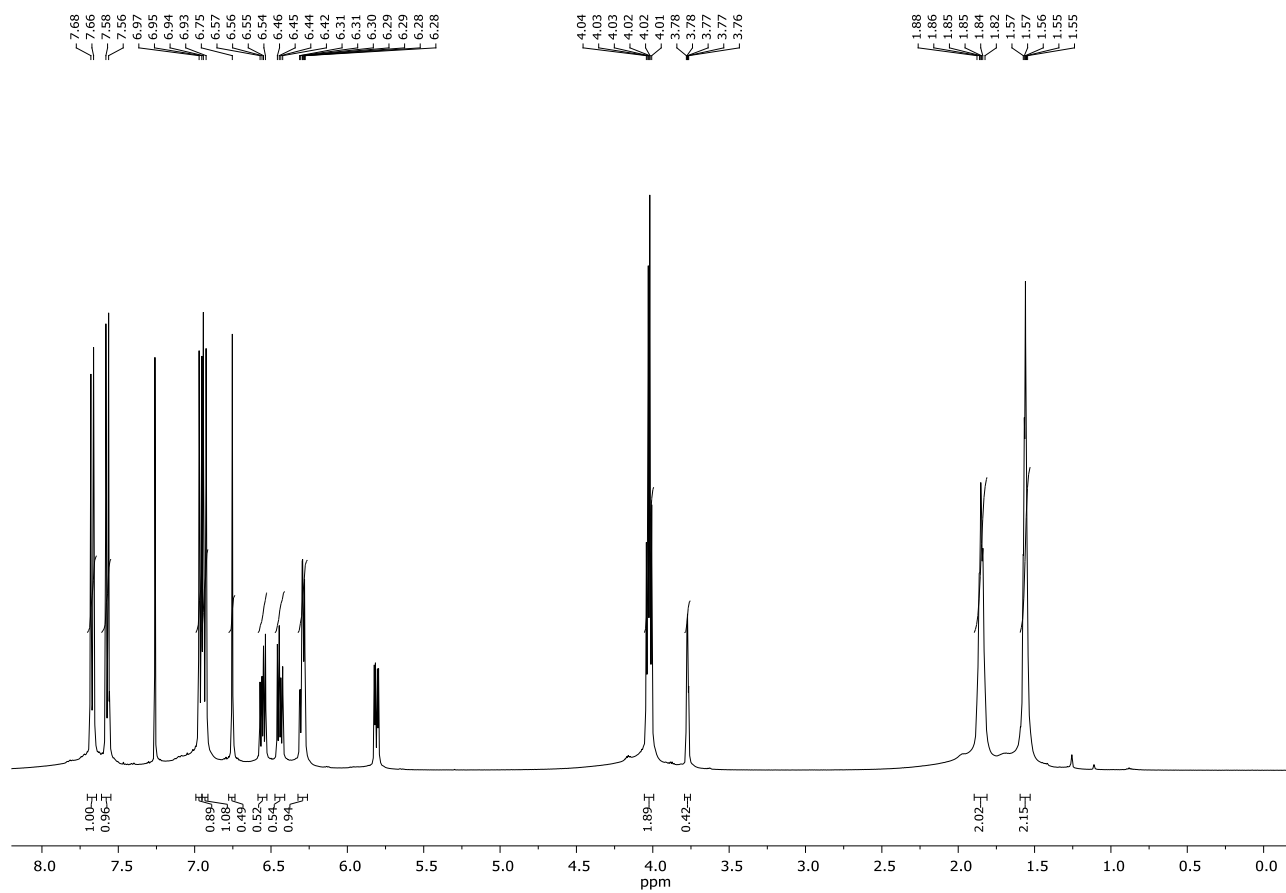



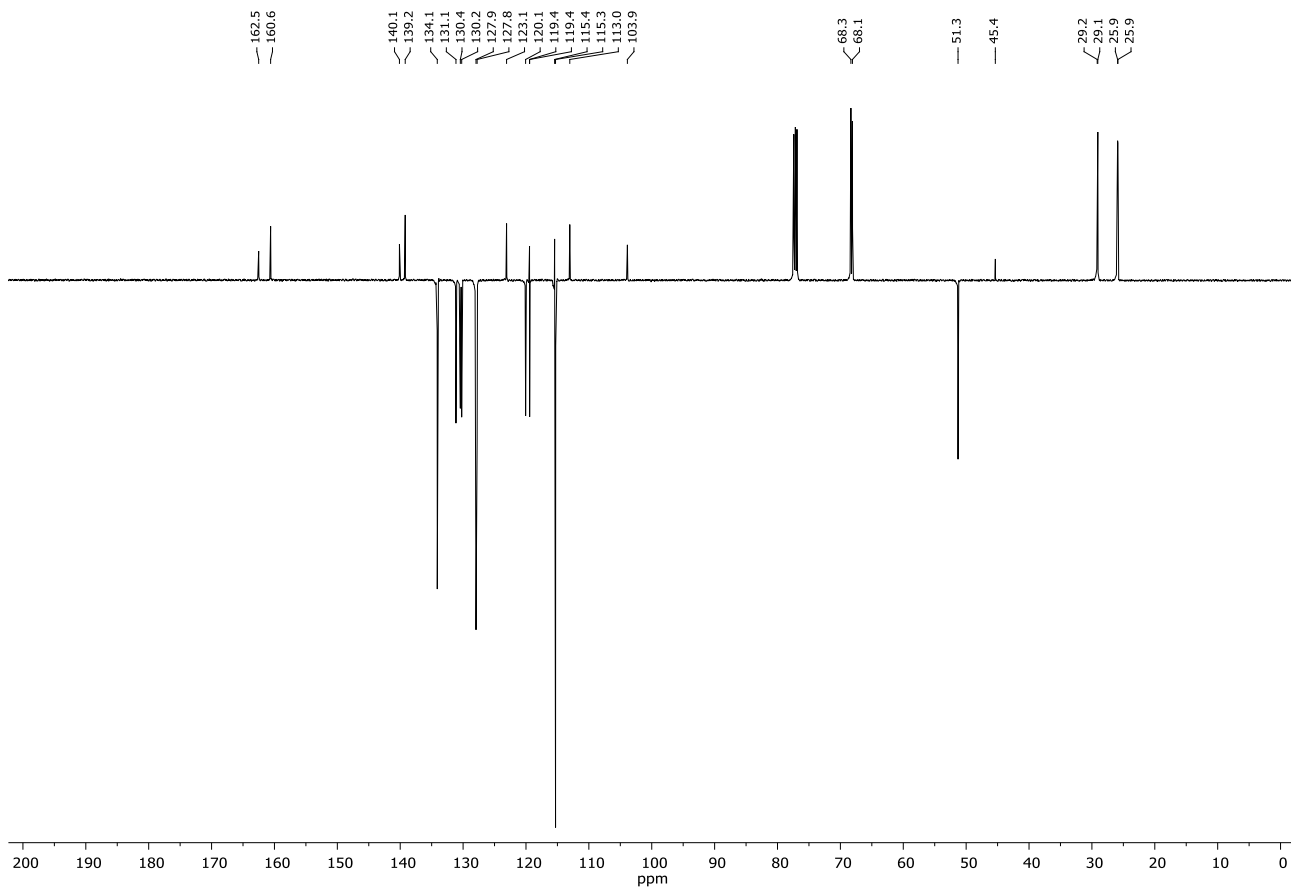

# Compound 3c

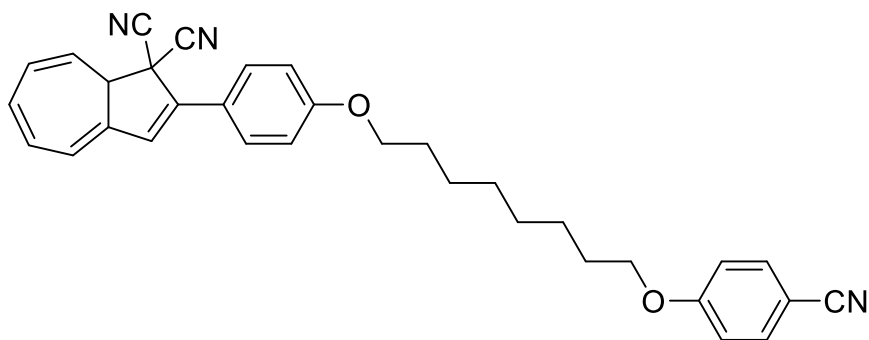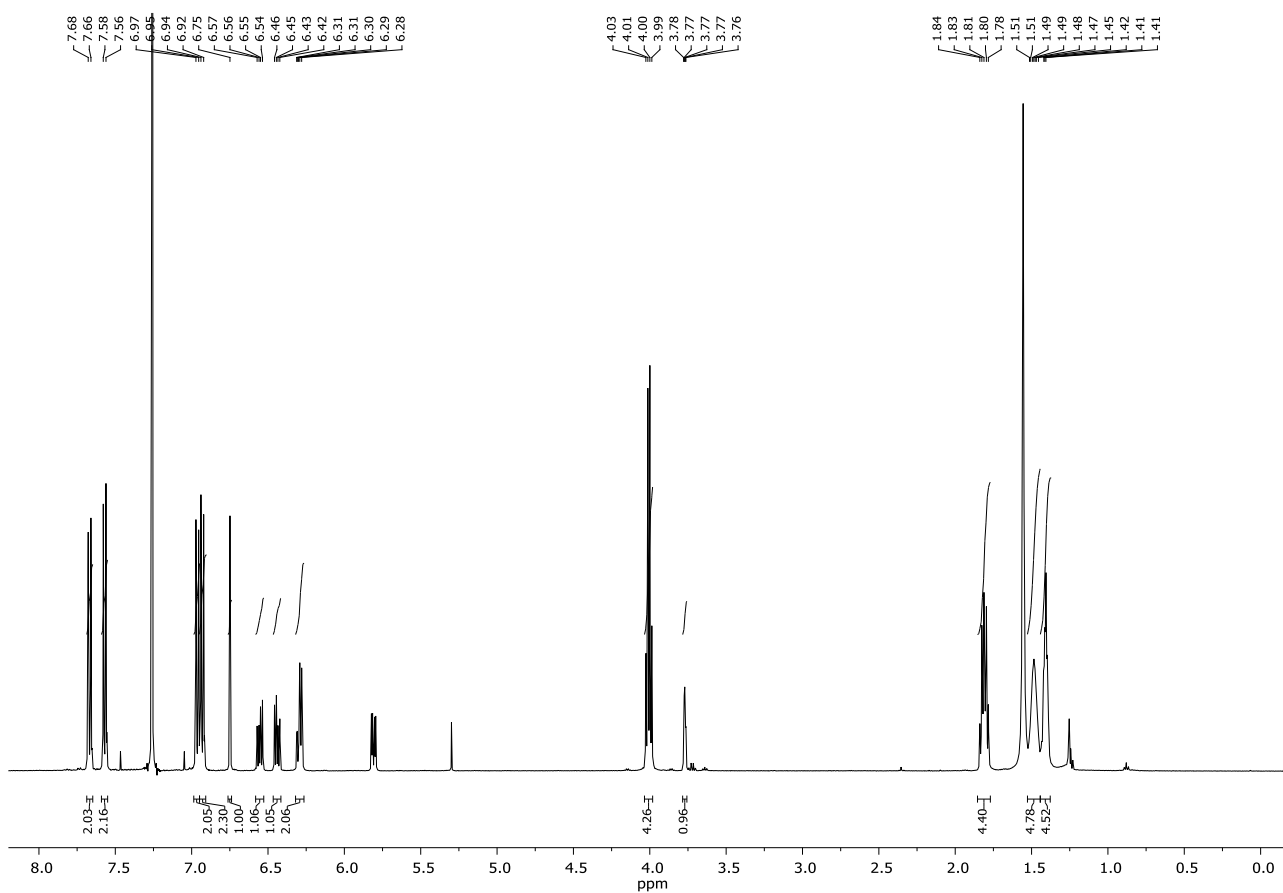

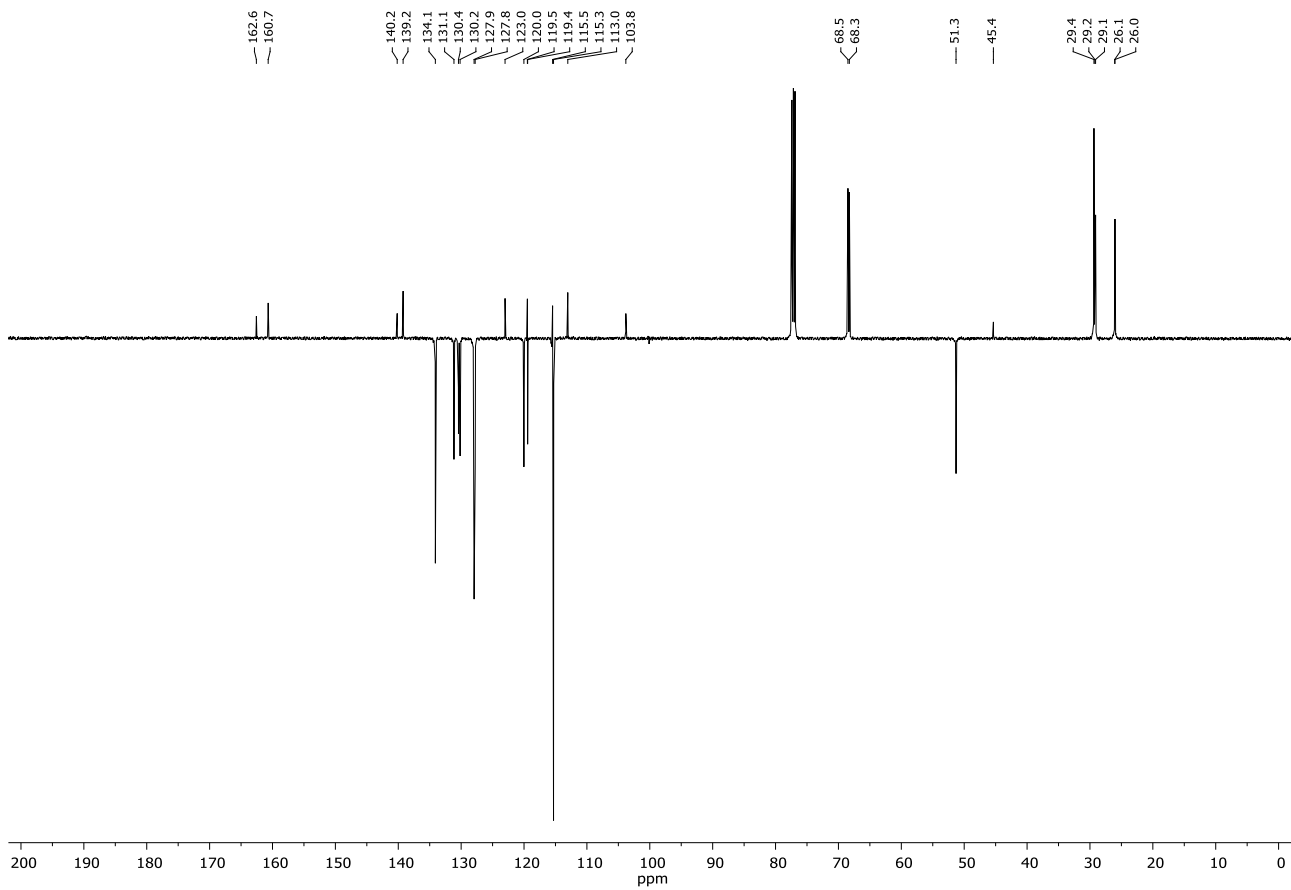

# Compound 3d

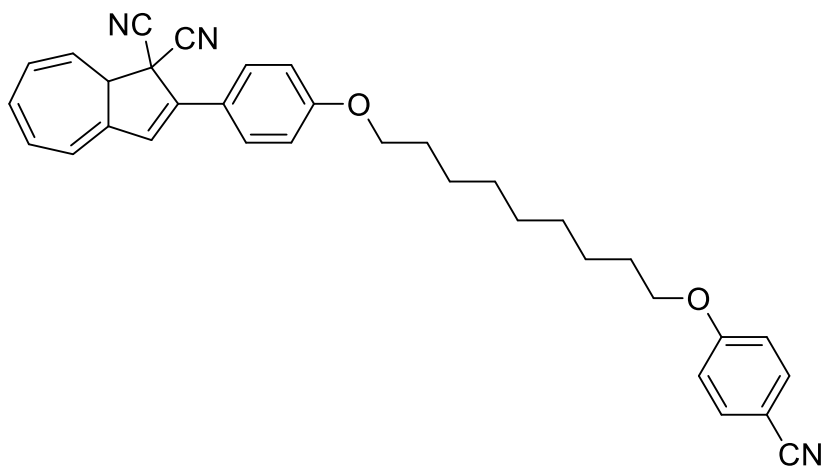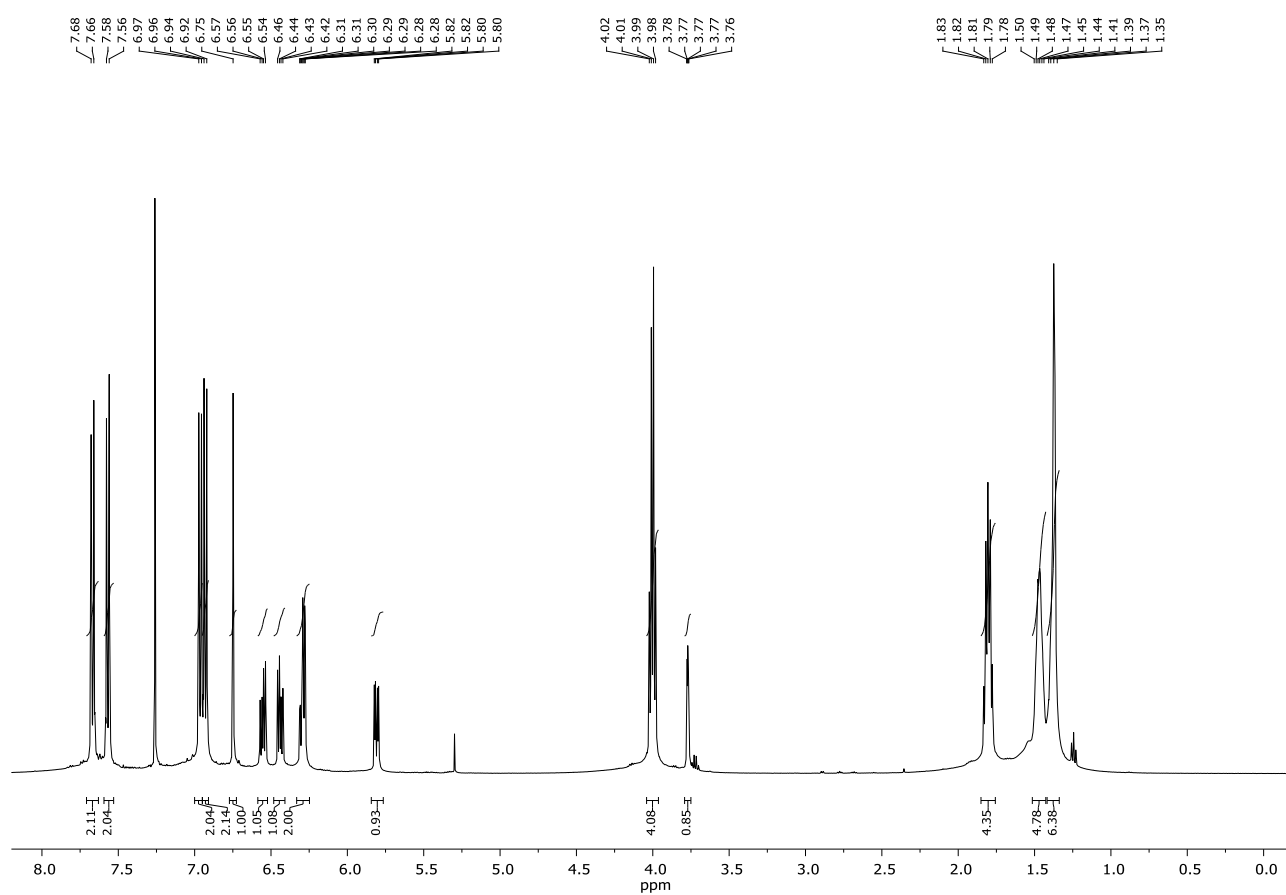

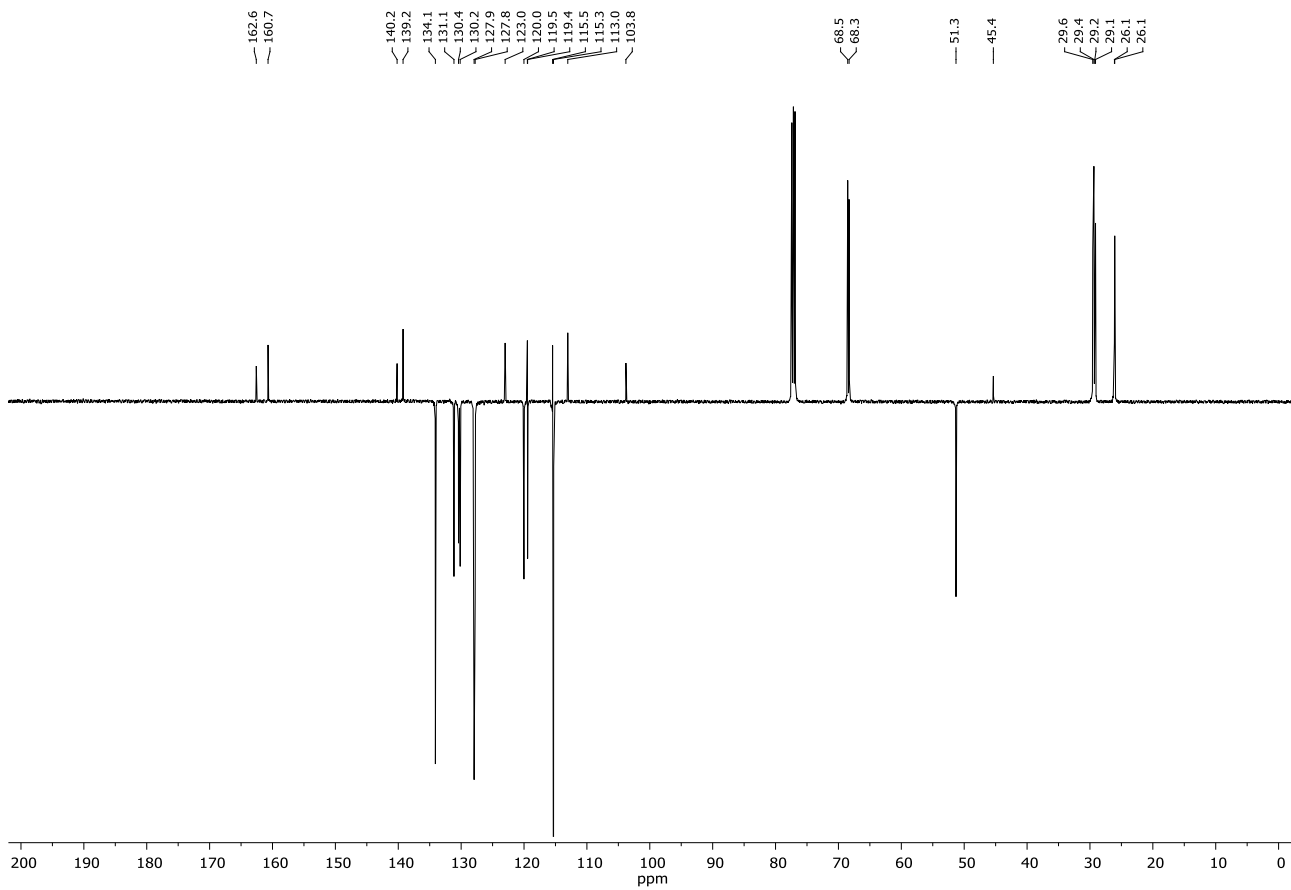

# Compound 3e

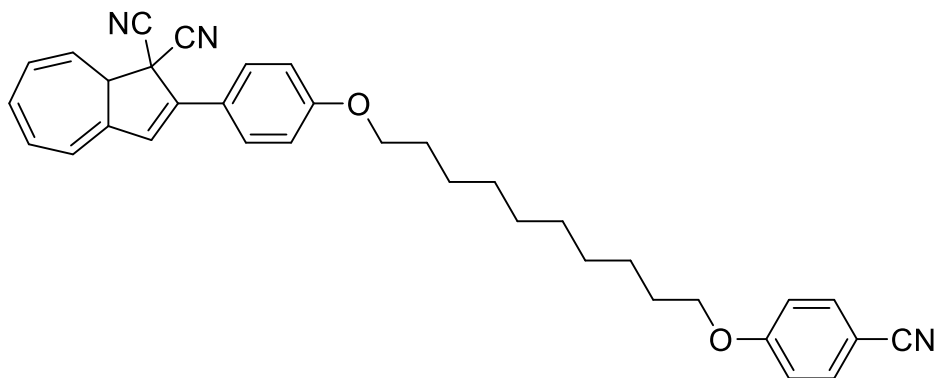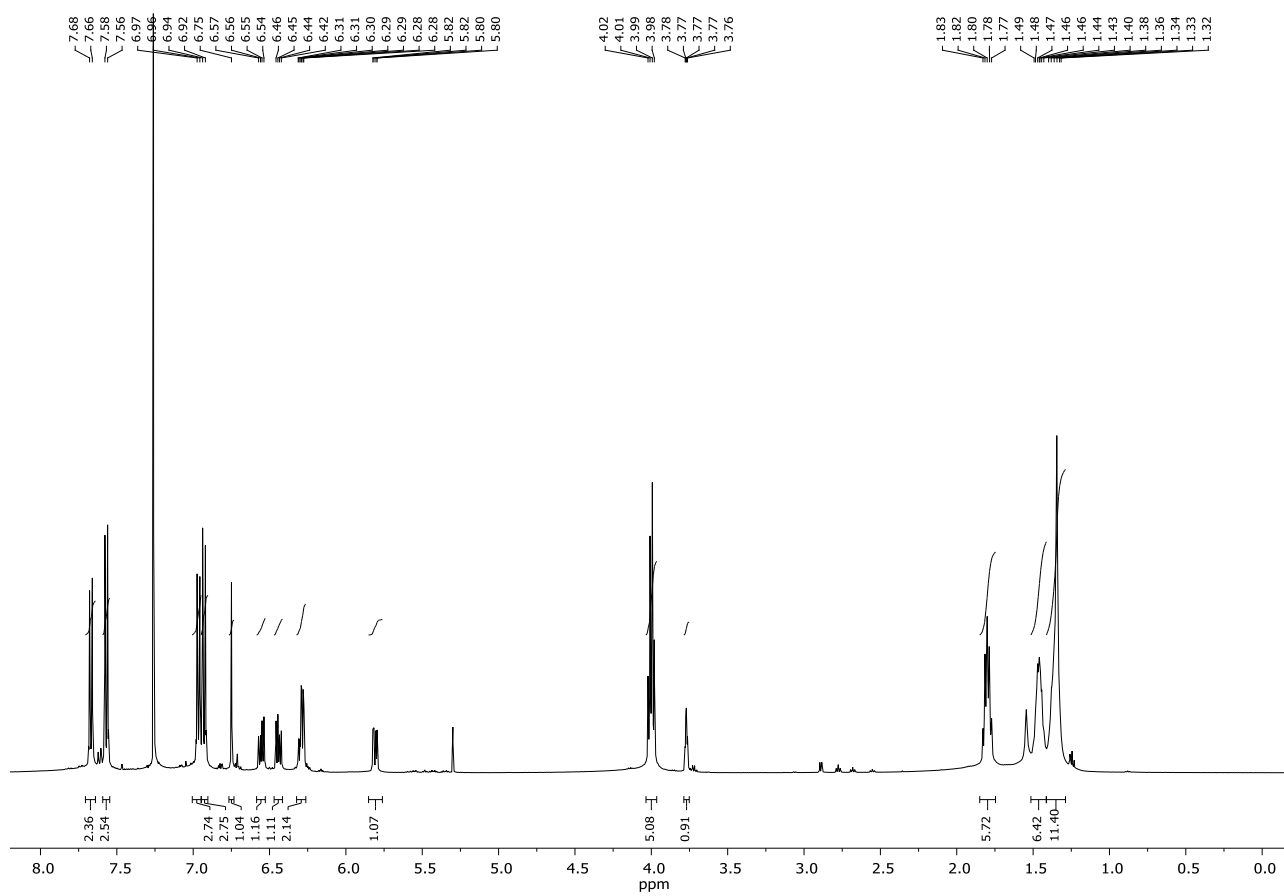

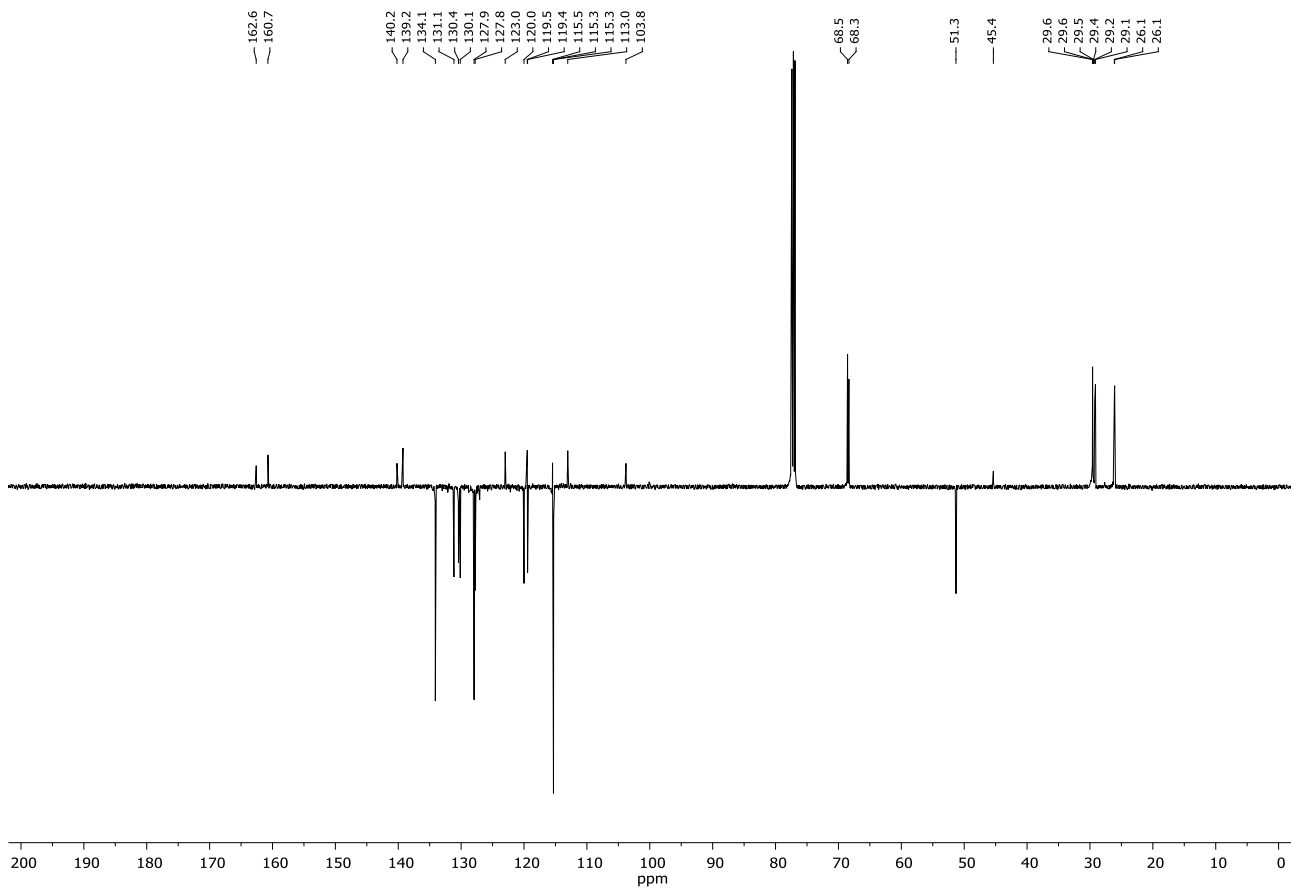





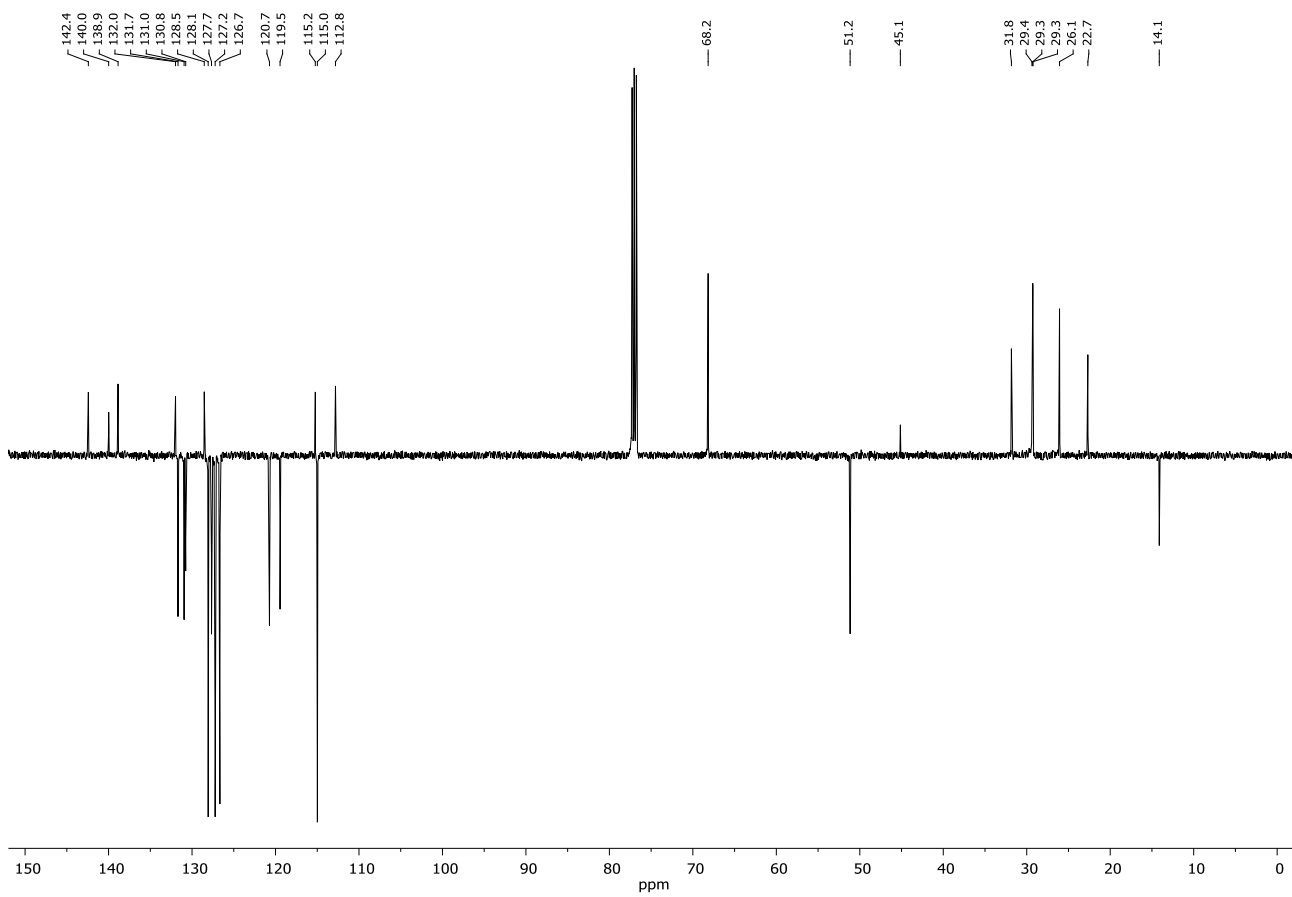



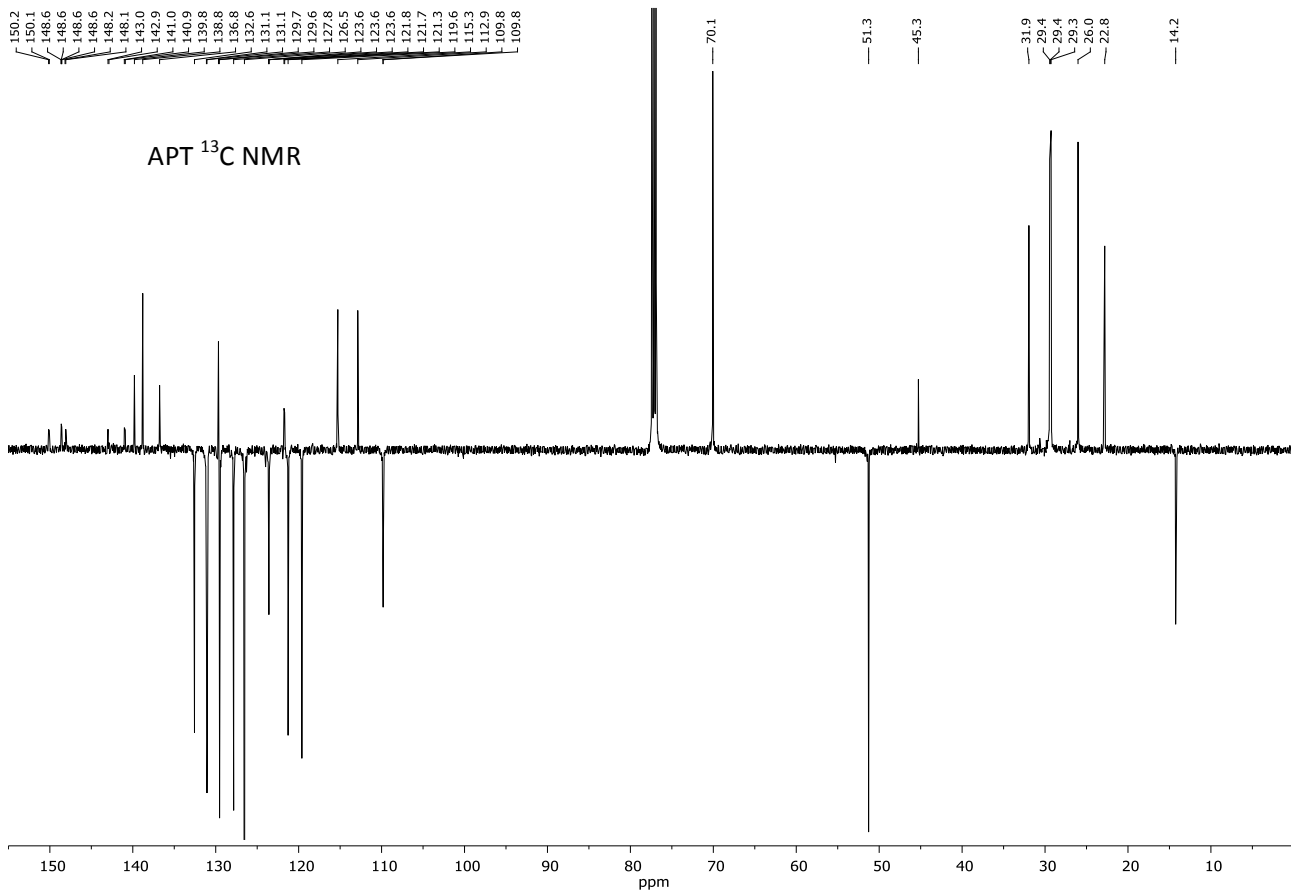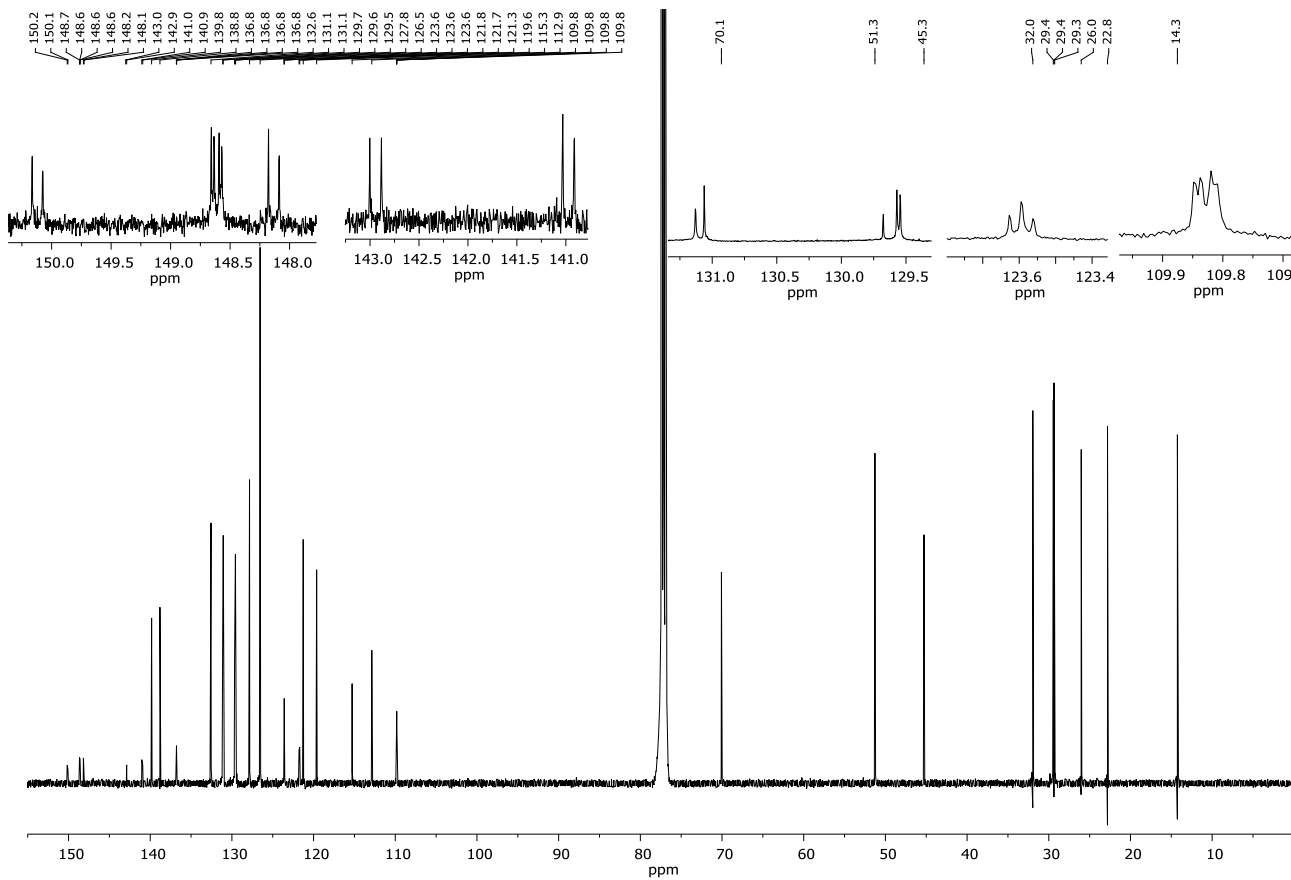

# Compound 3h

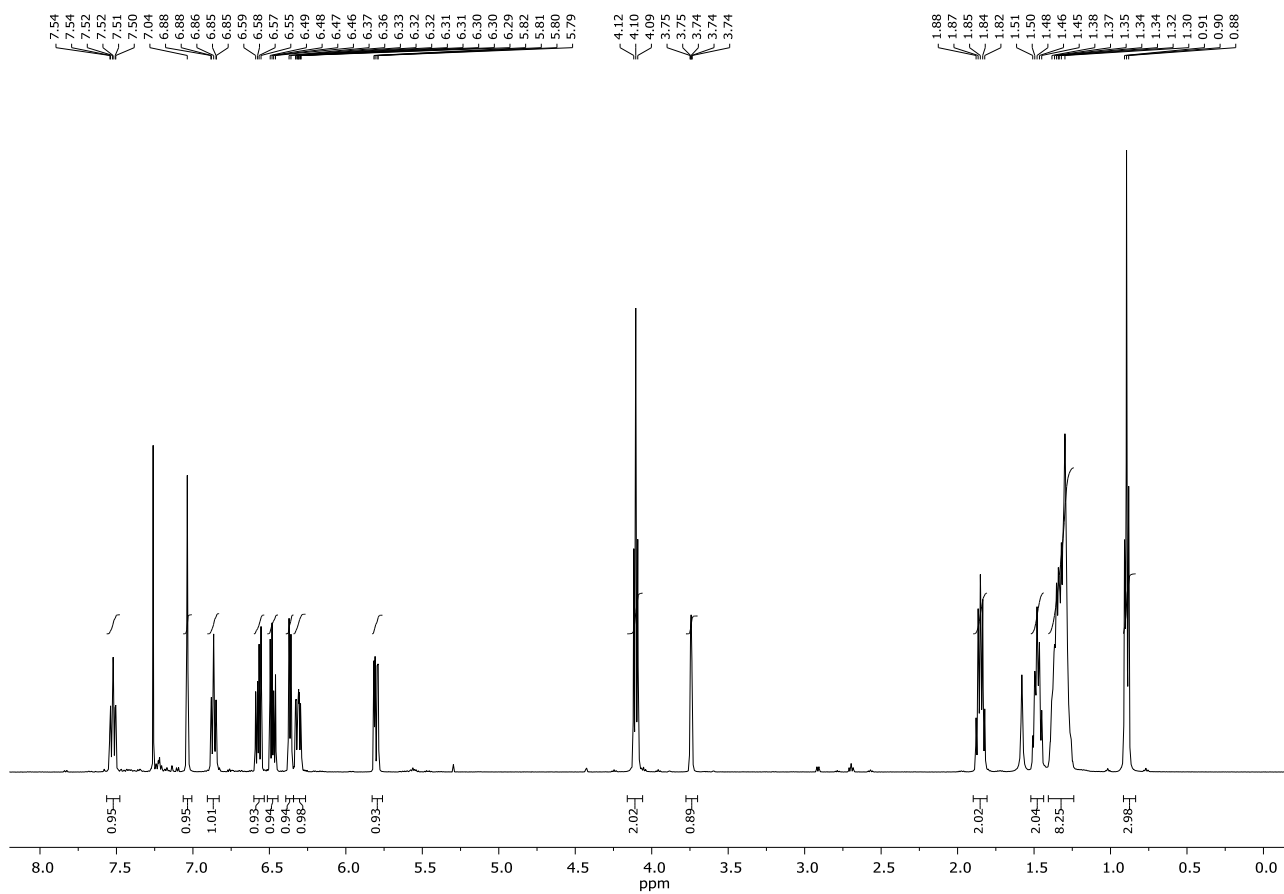

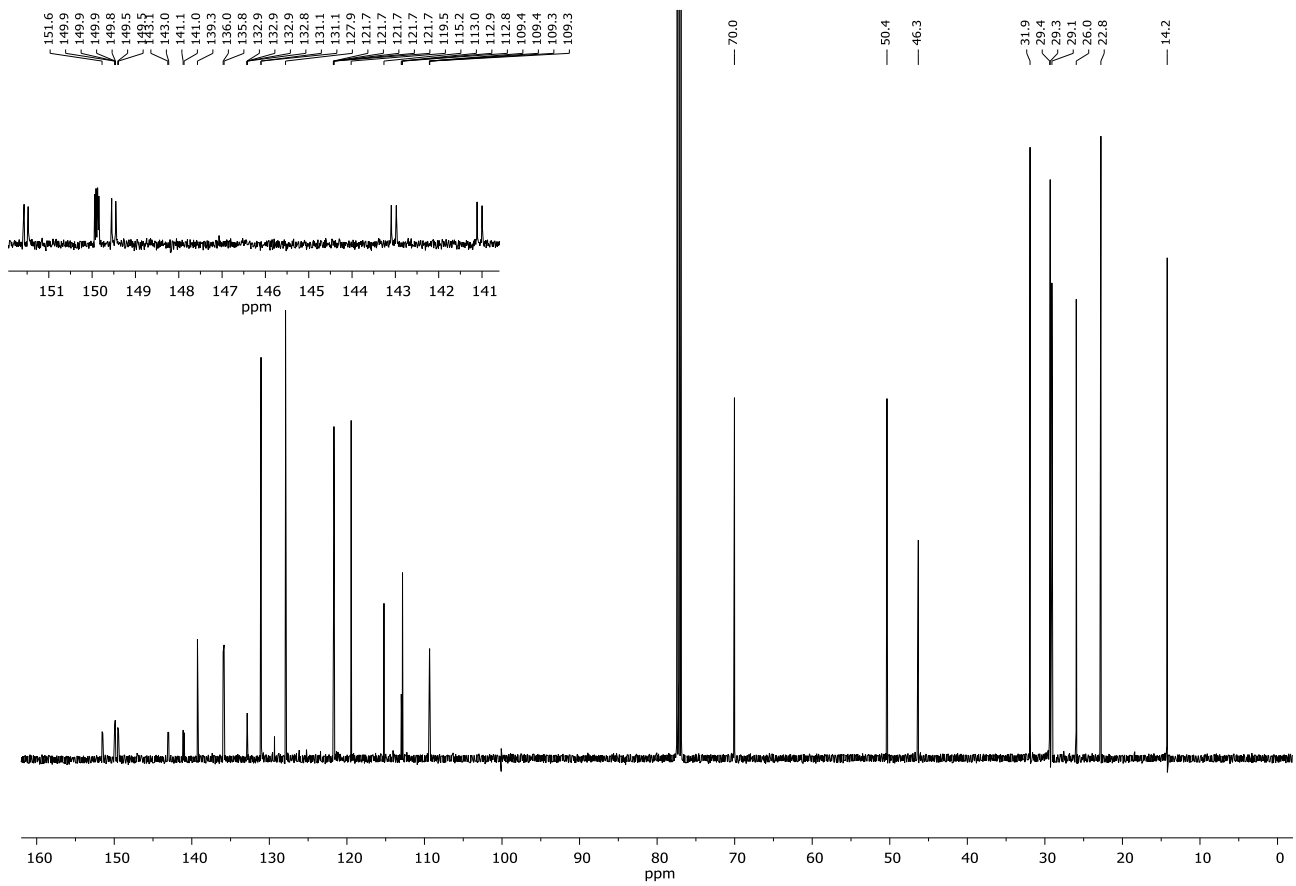

# Compound 3i

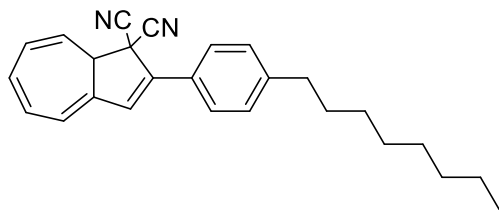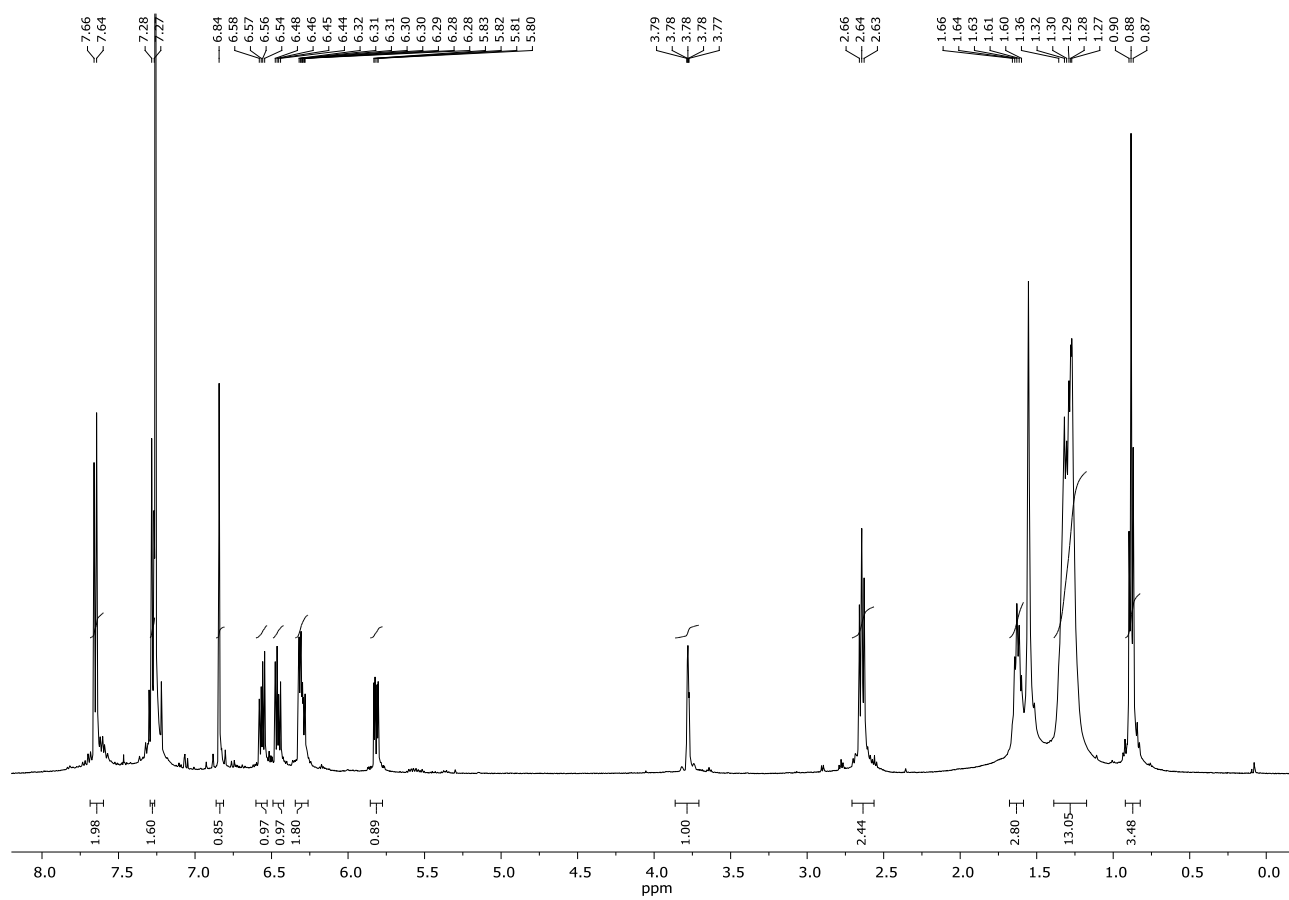

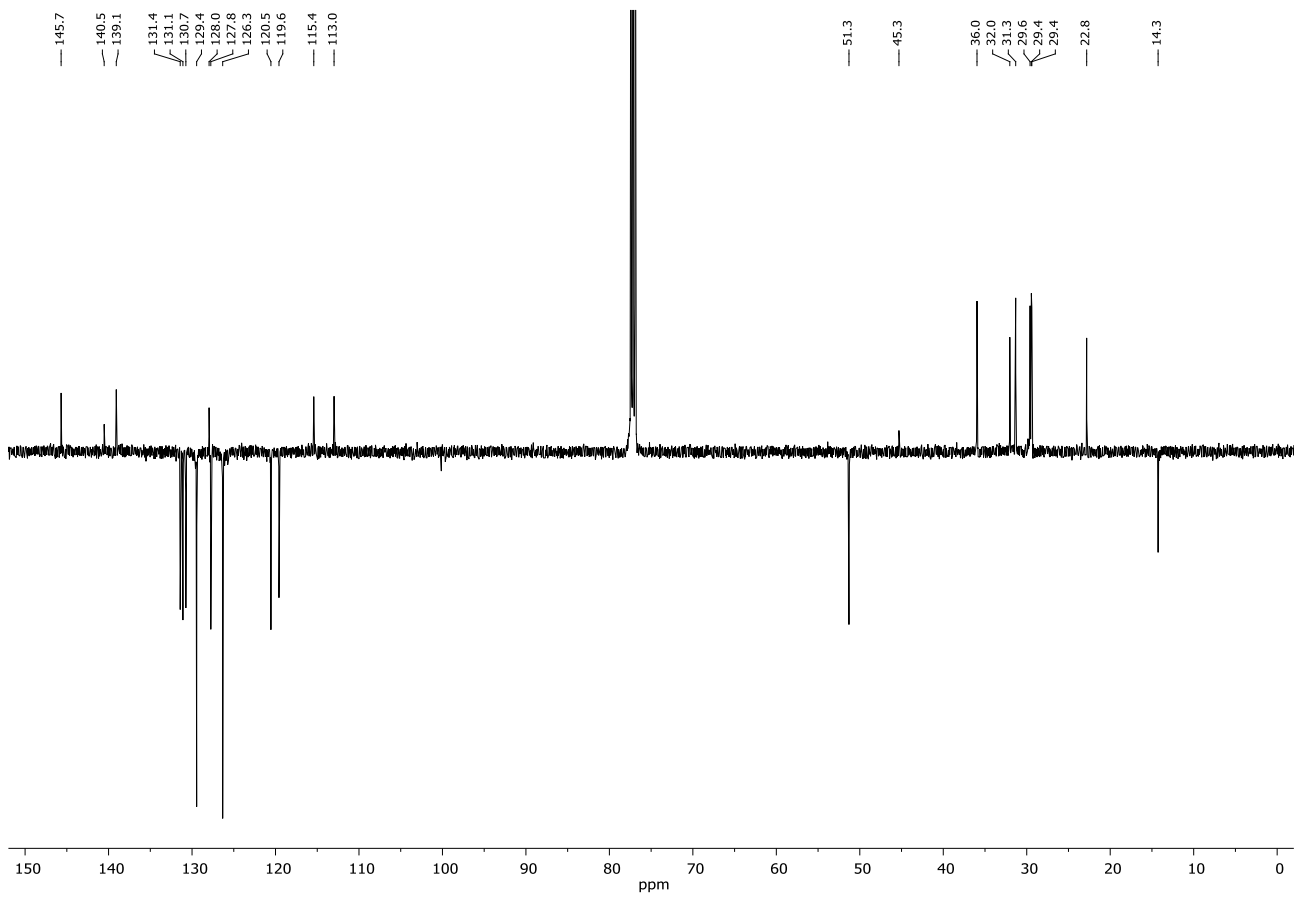

# Compound 14a

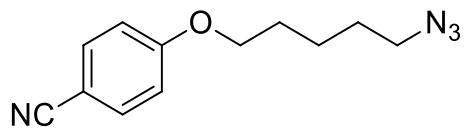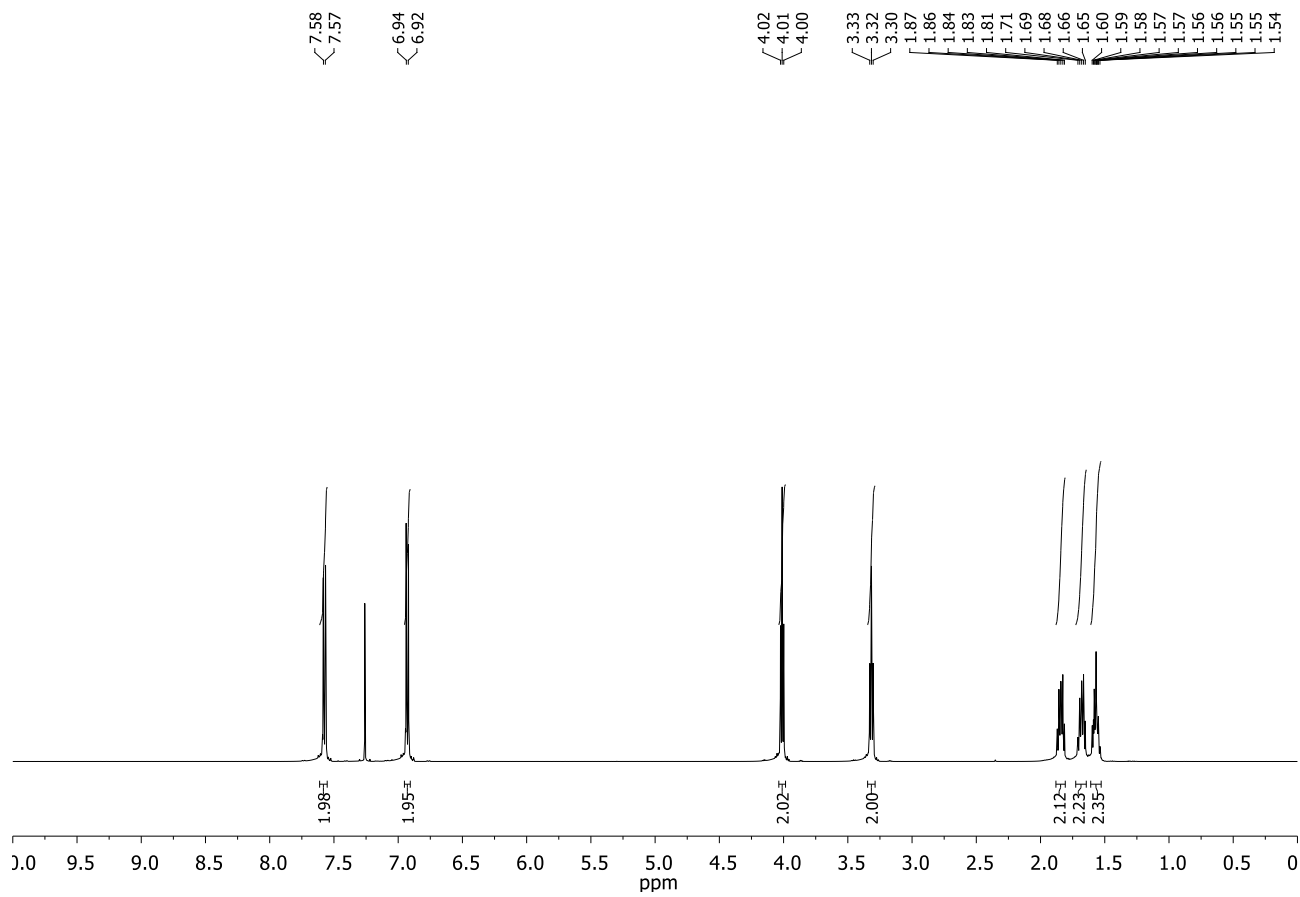



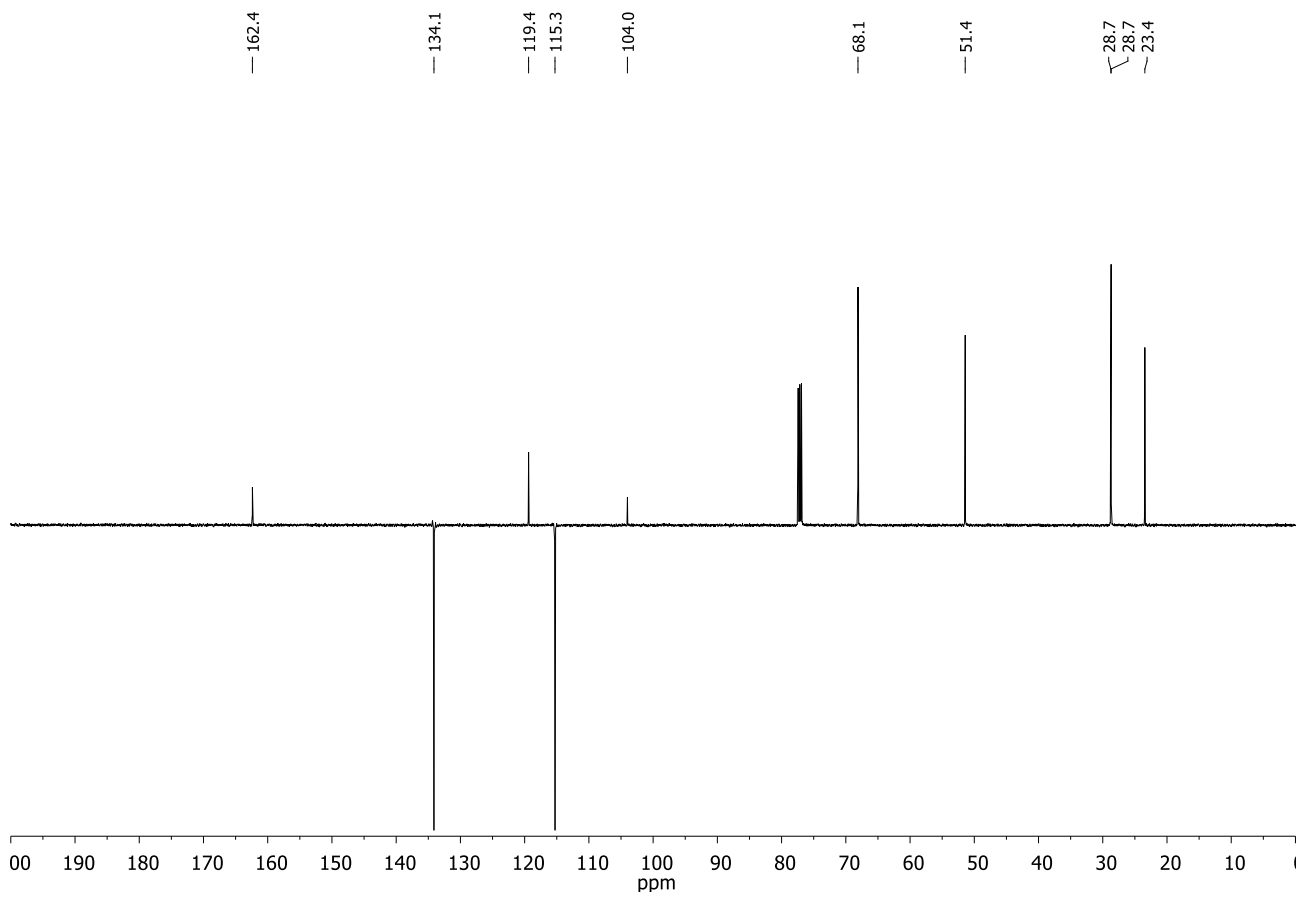

# Compound 14b

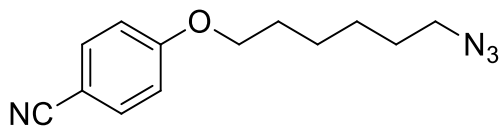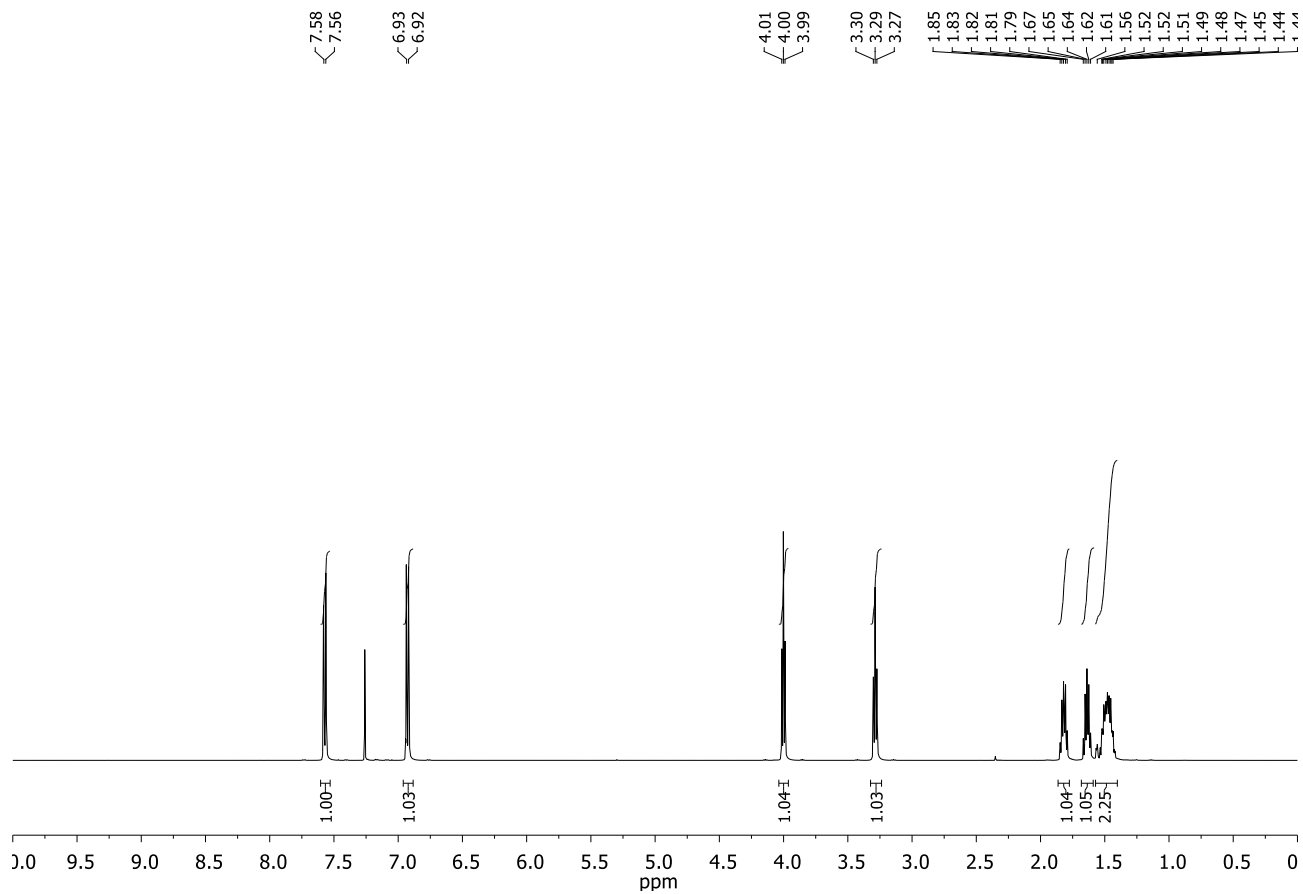

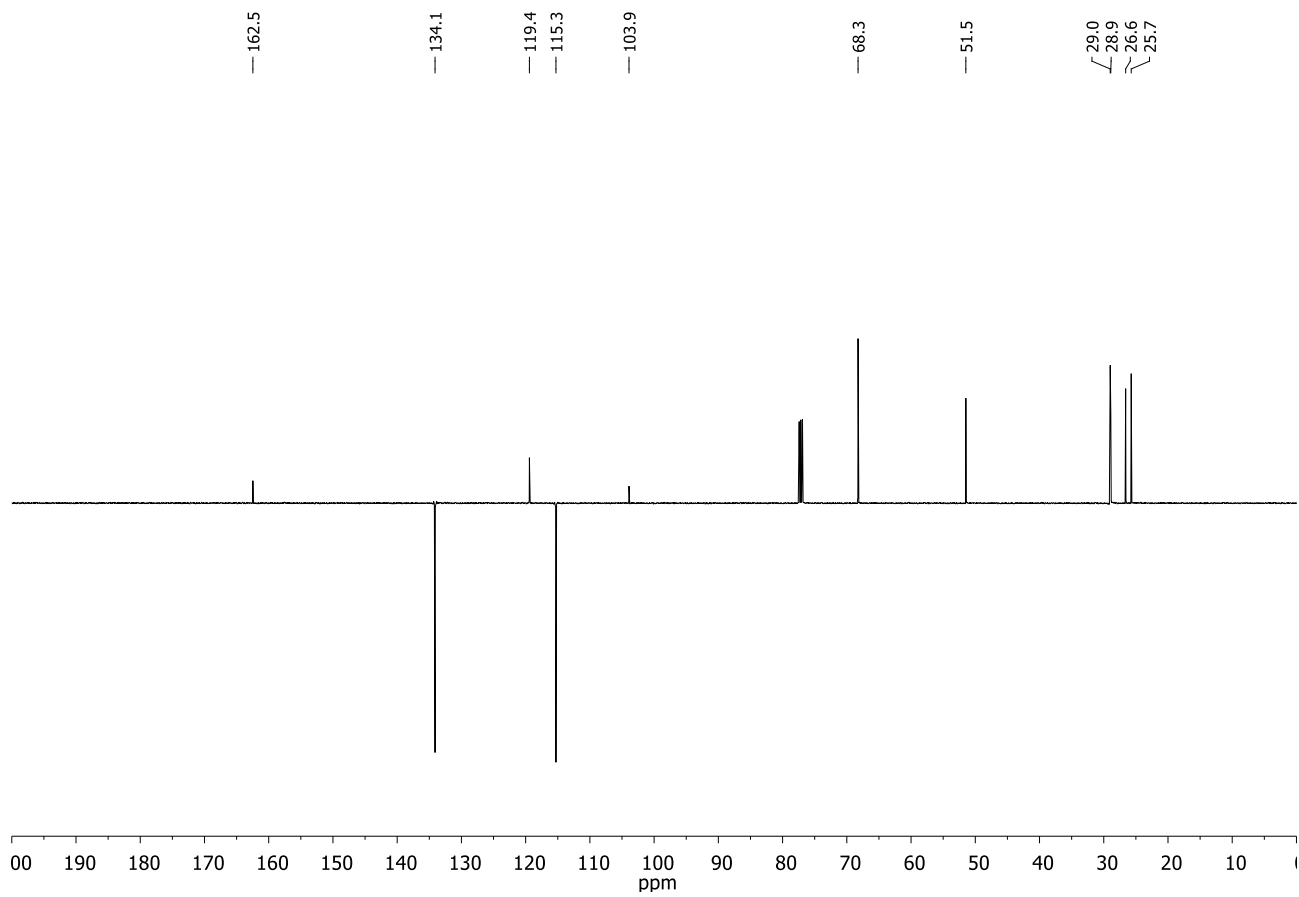

# Compound 14c

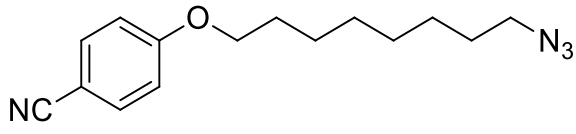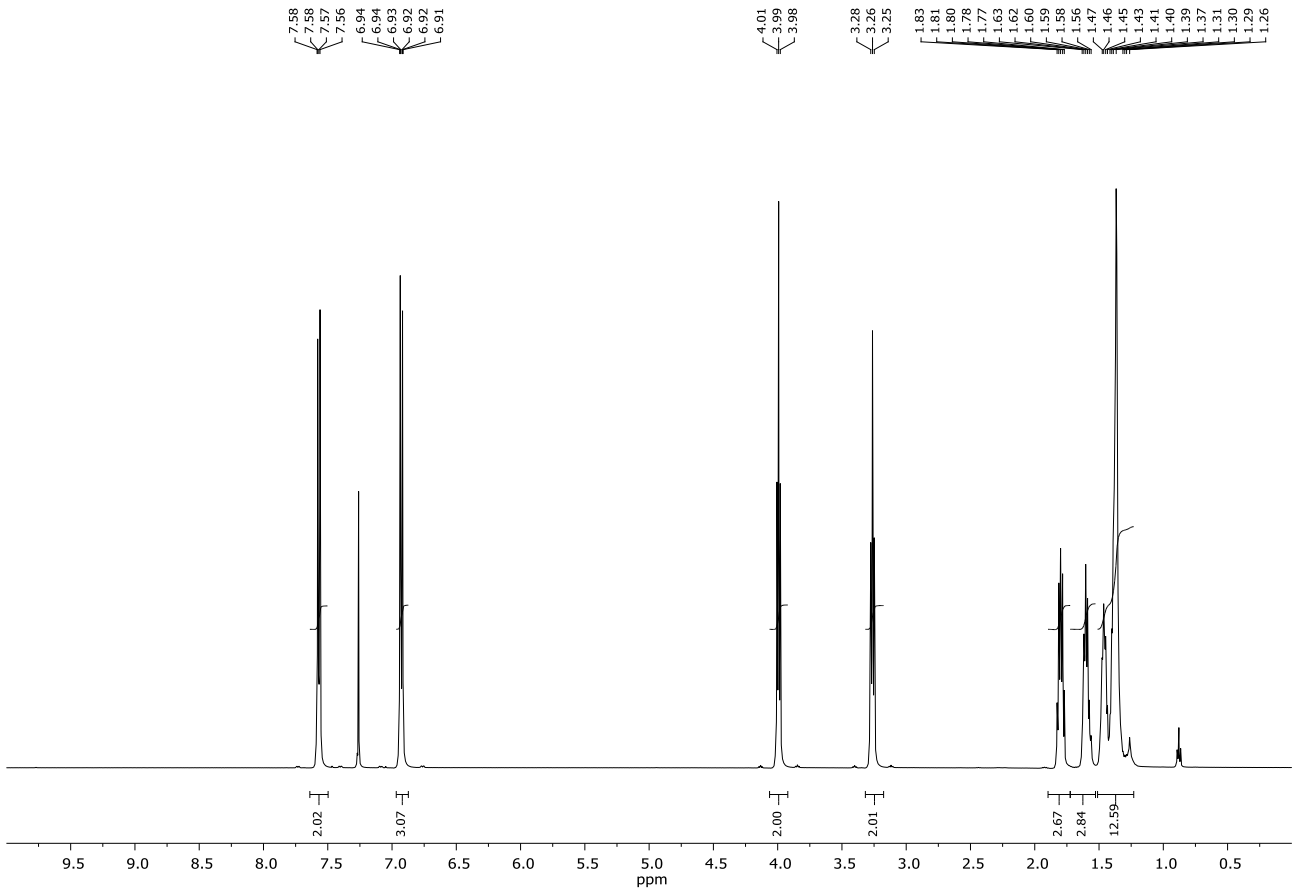

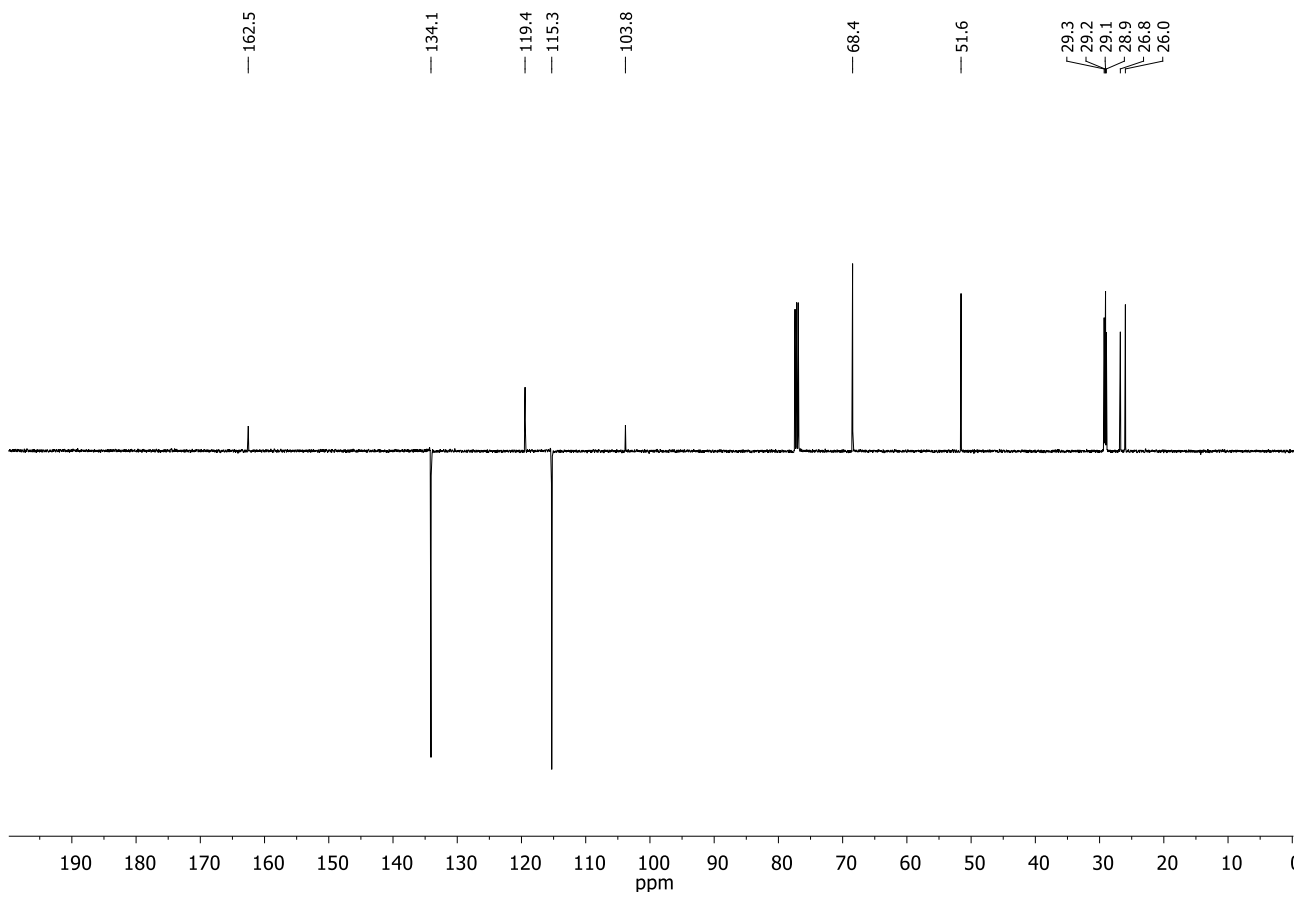

# Compound 14d

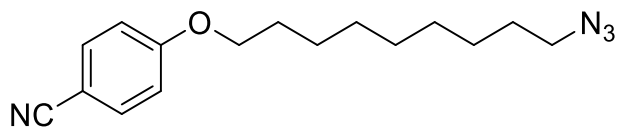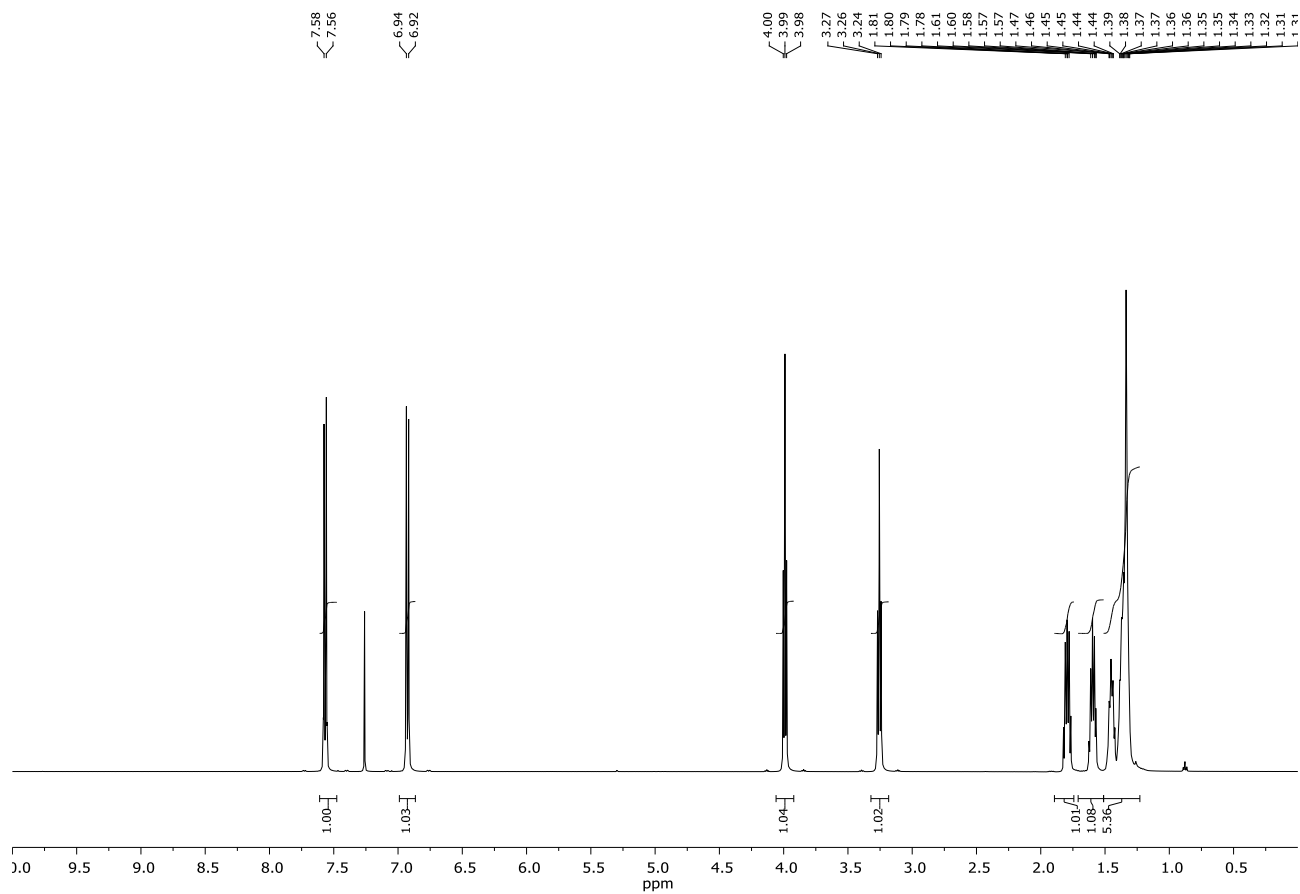

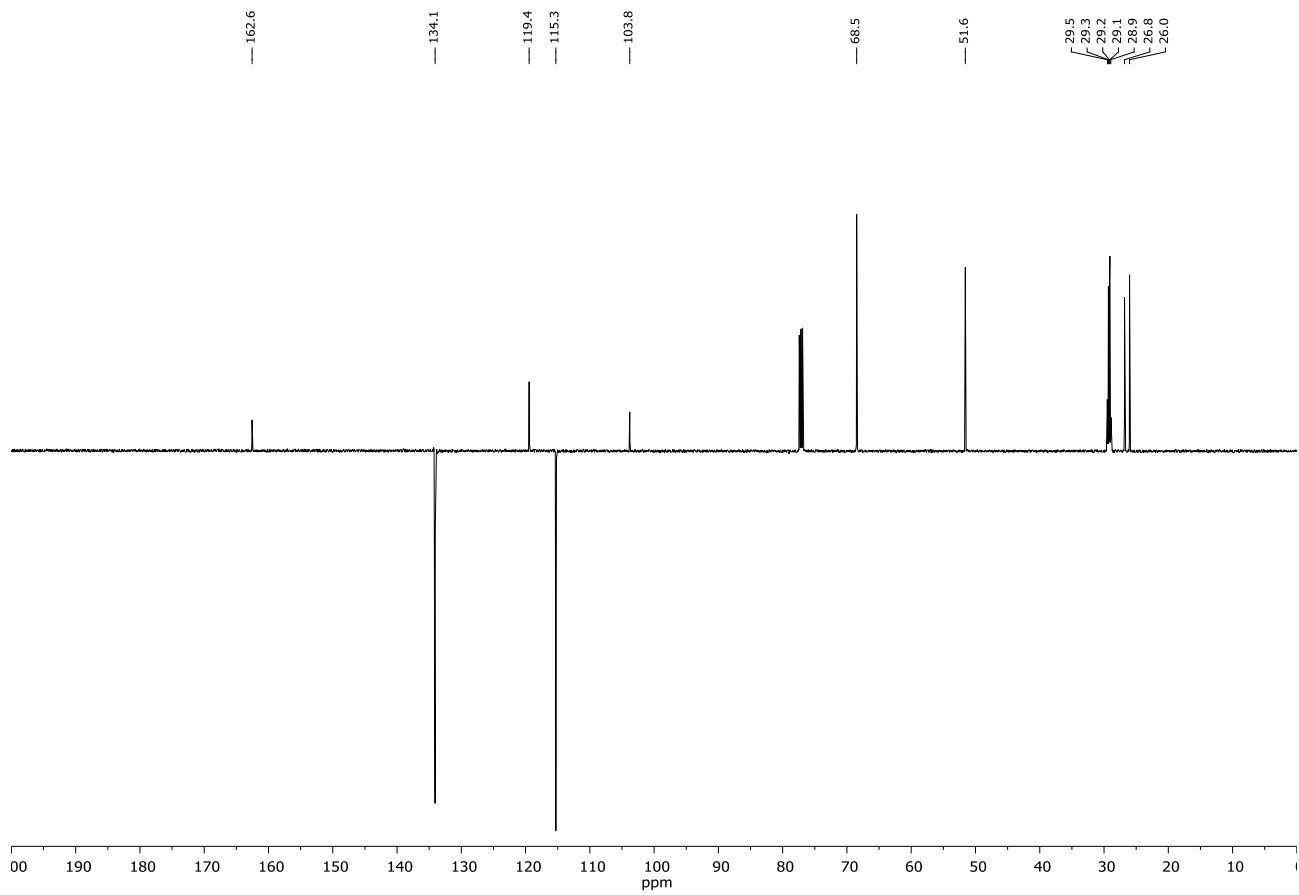

# Compound 14e

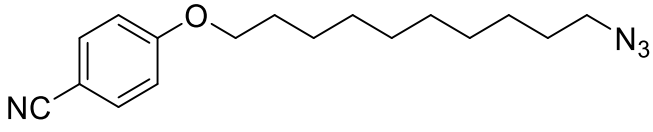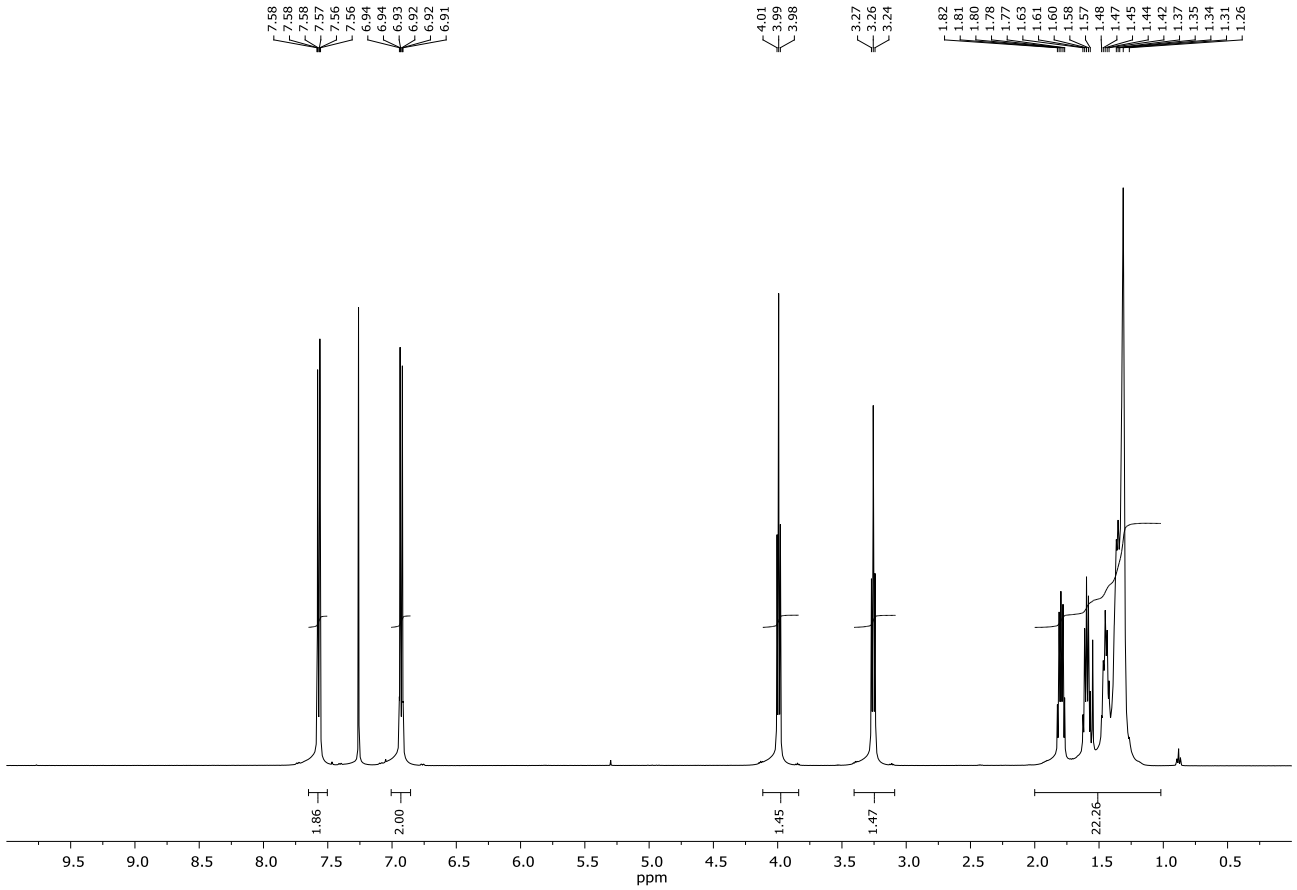



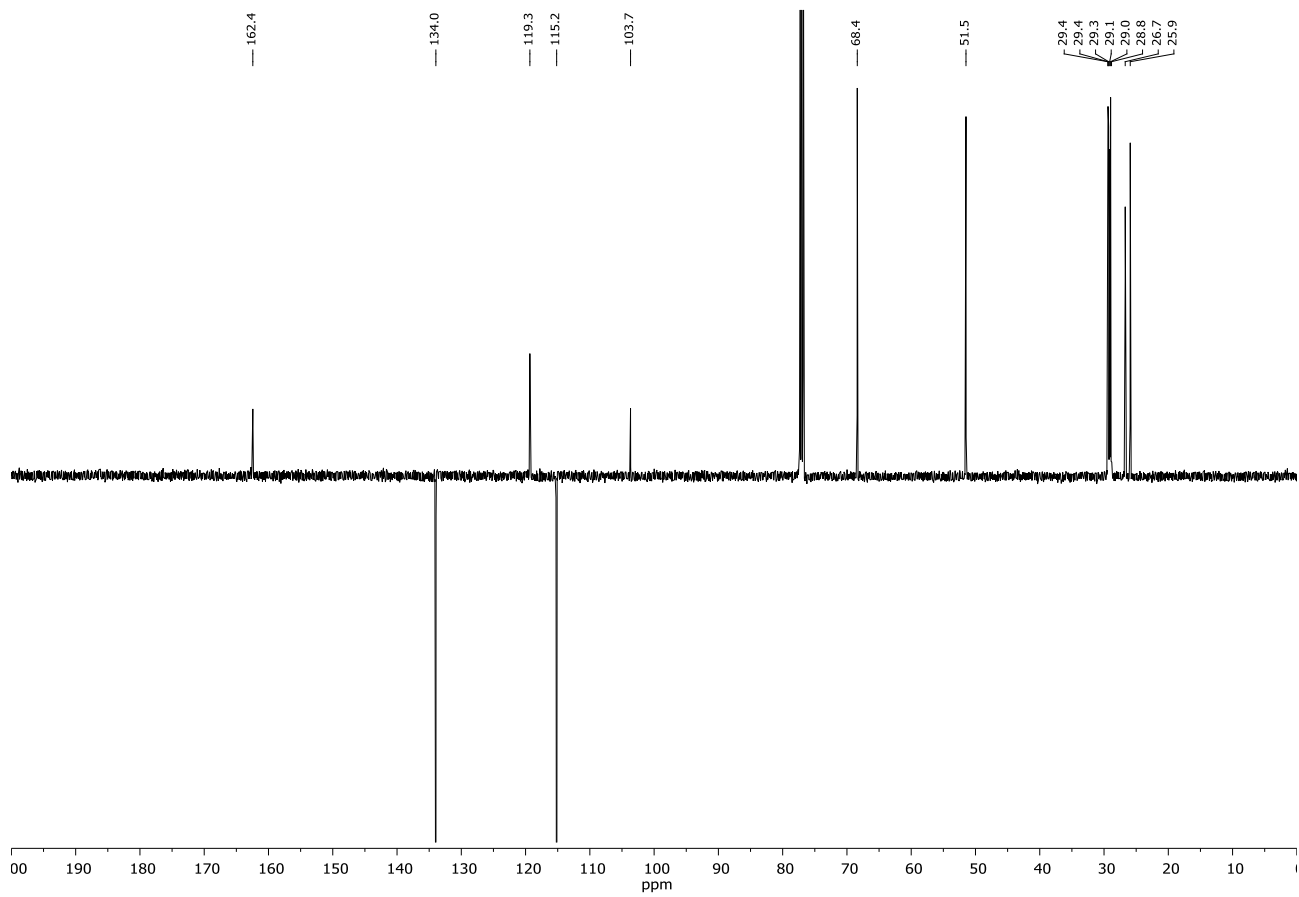

# Compound 4a

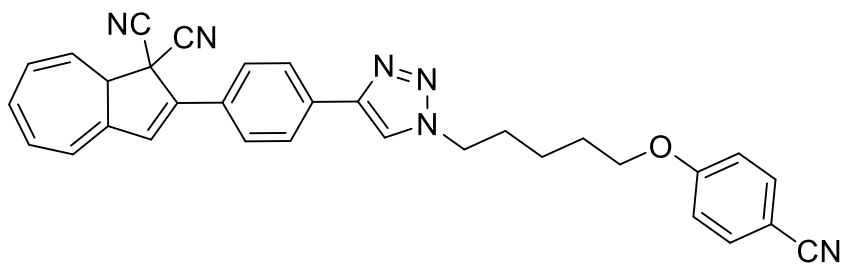

7.93  
7.92  
7.82  
7.80  
7.79  
7.75  
7.55  
6.93  
6.91  
6.89  
6.59  
6.58  
6.57  
6.56  
6.50  
6.49  
6.48  
6.46  
6.36  
6.35  
6.33  
6.33  
6.32  
6.31  
6.31  
6.31  
6.30  
6.29  
5.84  
5.83  
5.82  
5.81  
4.48  
4.46  
4.45  
4.01  
3.99  
3.98  
3.81  
3.80  
3.80  
3.80  
3.79  
2.09  
2.07  
2.06  
2.04  
2.03  
1.90  
1.88  
1.87  
1.85  
1.84  
1.59  
1.57  
1.56  
1.54  
1.54  
1.53

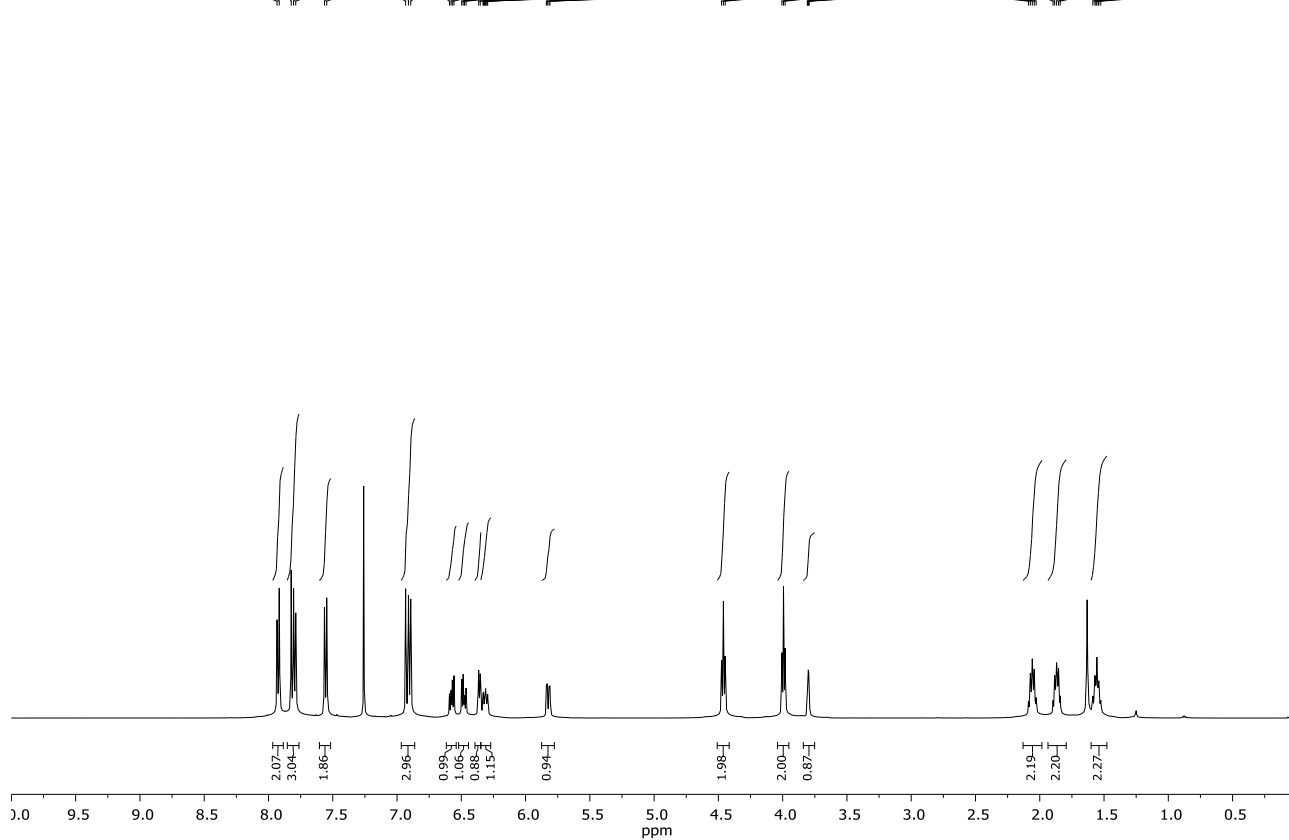

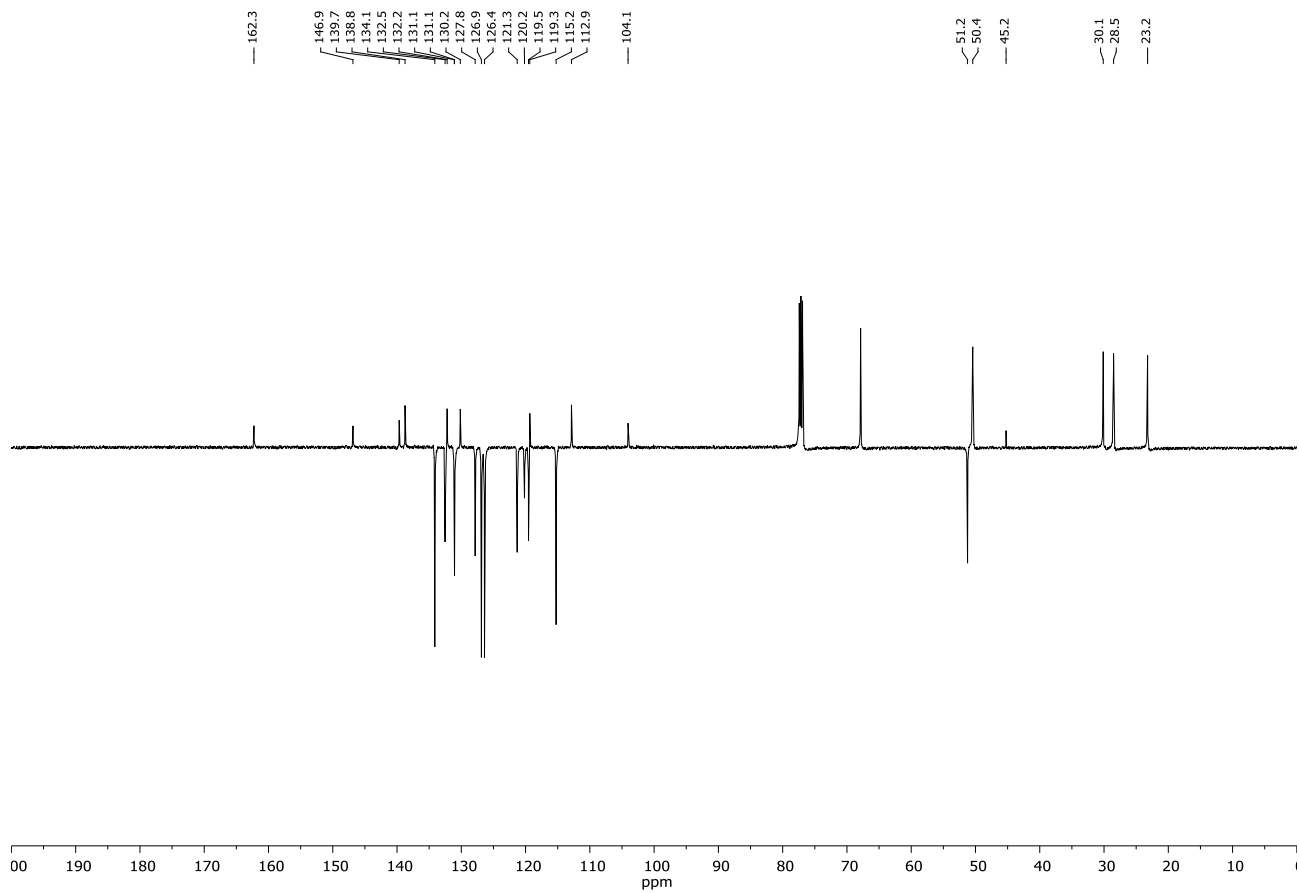



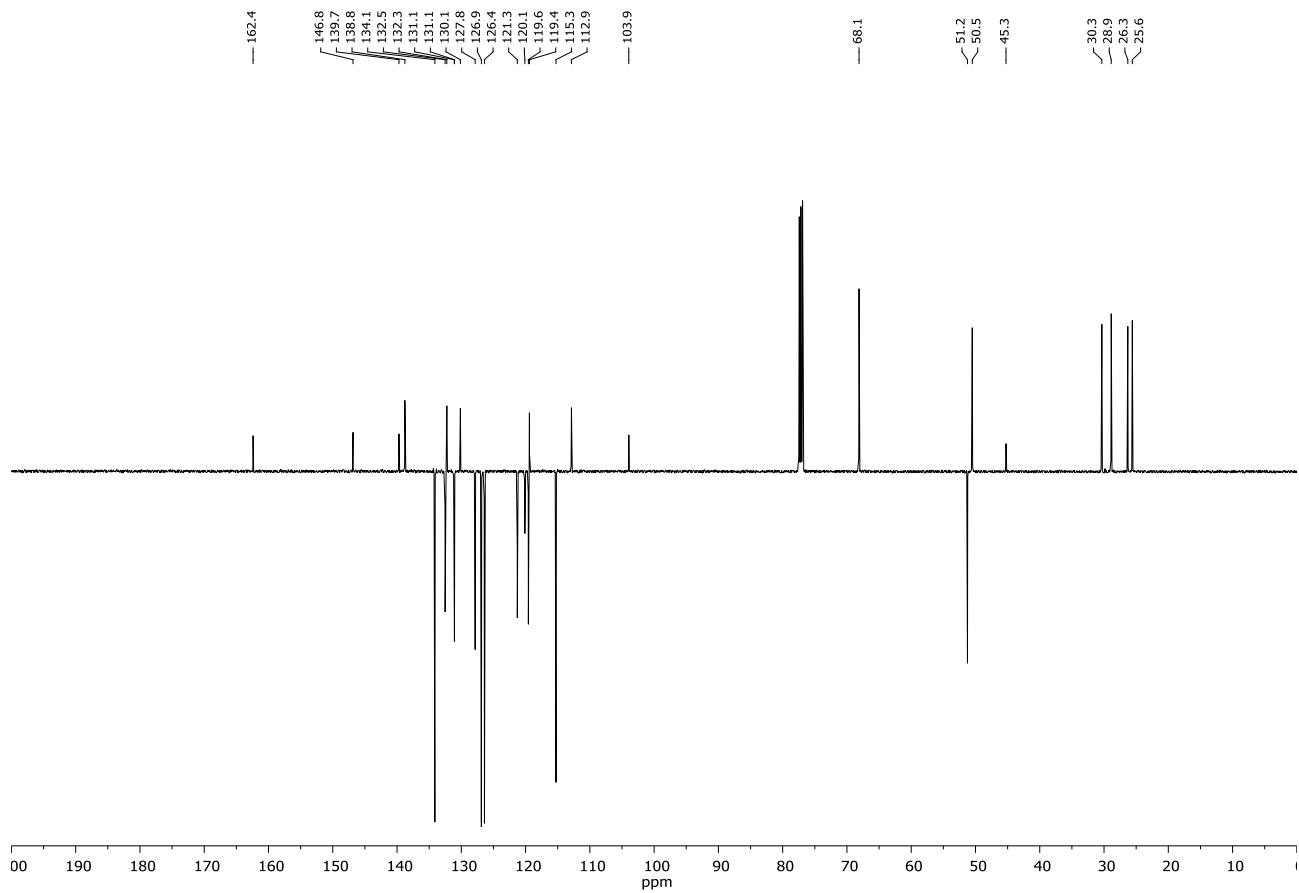

# Compound 4c

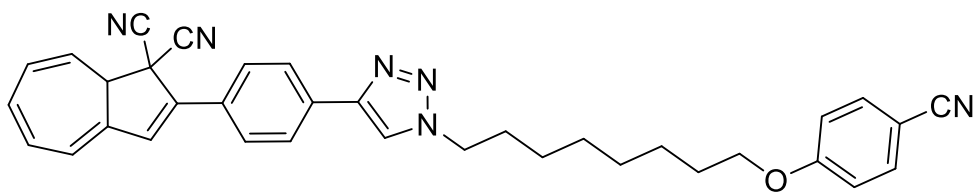

7.94  
7.92  
7.81  
7.80  
7.78  
7.57  
7.55

6.93  
6.92  
6.90  
6.59  
6.58  
6.57  
6.56  
6.50  
6.48  
6.47  
6.46  
6.36  
6.35  
6.33  
6.33  
6.32  
6.31  
6.31  
6.31  
6.30  
6.29  
5.84  
5.83  
5.82  
5.81  
4.45  
4.42  
4.40  
3.99  
3.97  
3.96  
3.81  
3.80  
3.80  
3.80  
3.79

2.00  
1.98  
1.97  
1.96  
1.81  
1.80  
1.78  
1.77  
1.75  
1.47  
1.46  
1.45  
1.43  
1.42  
1.38  
1.35

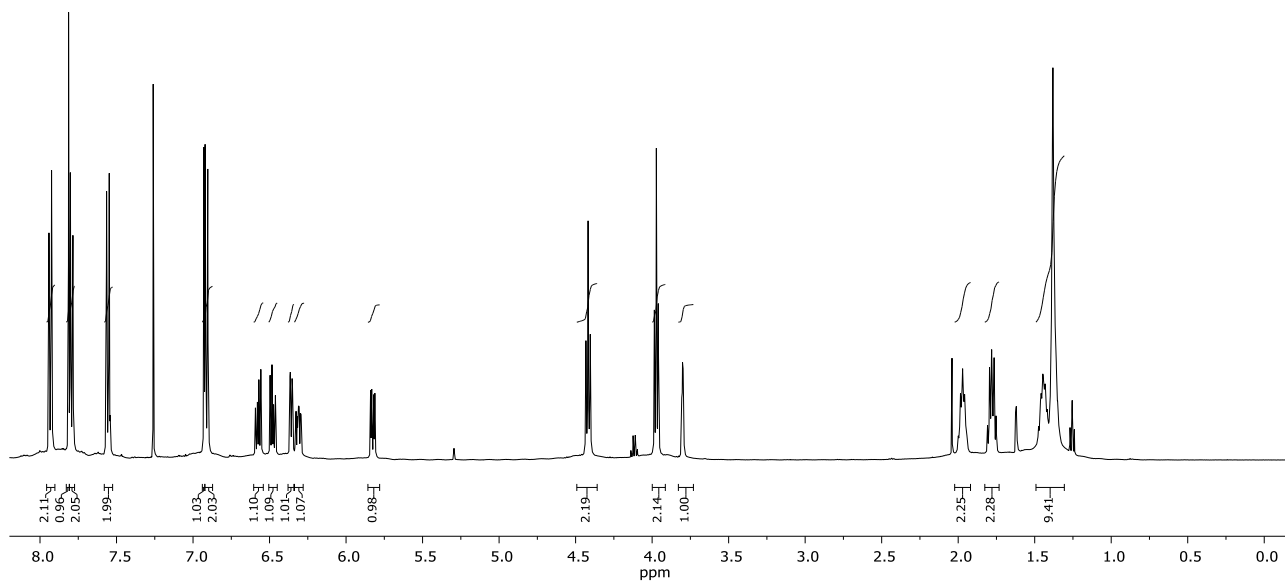

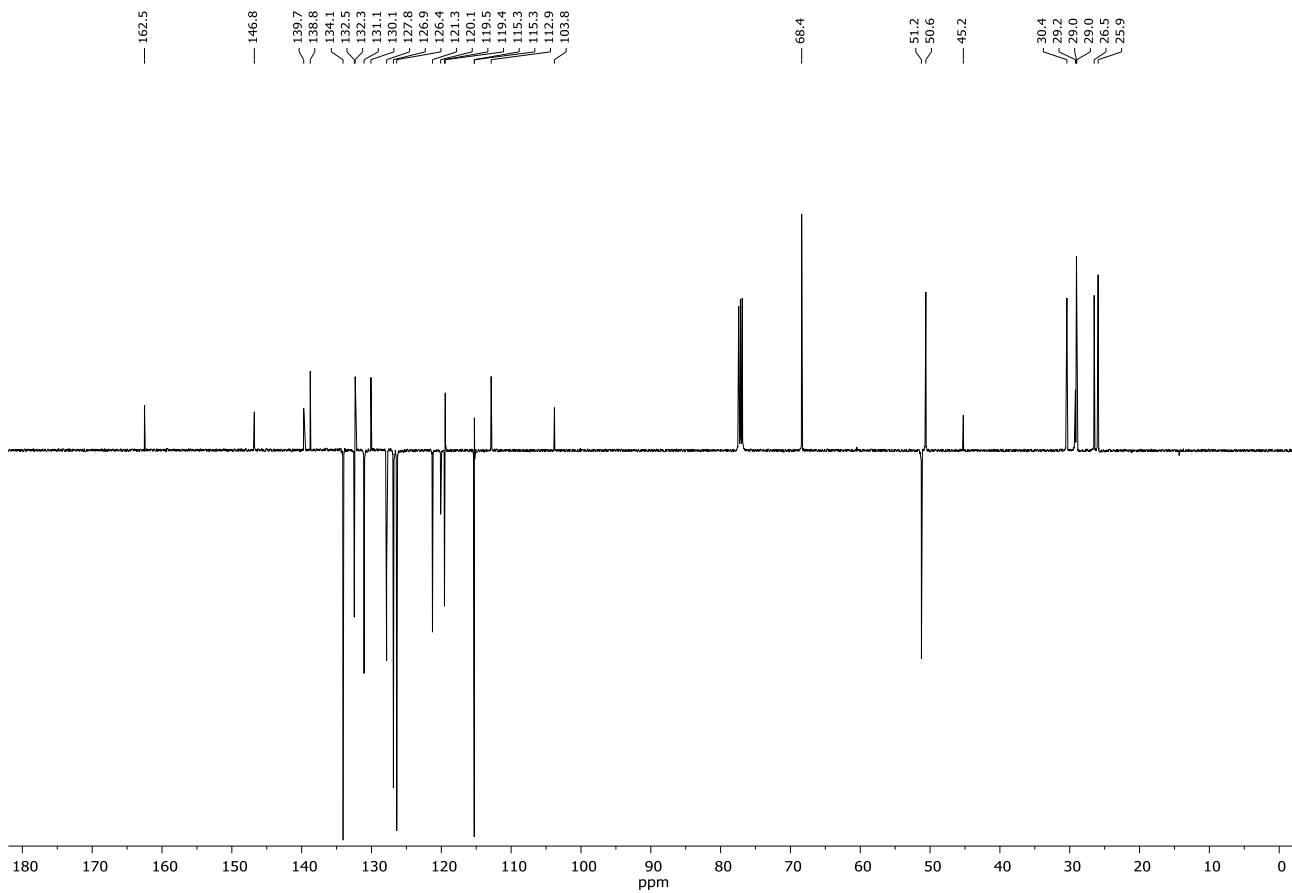

# Compound 4d

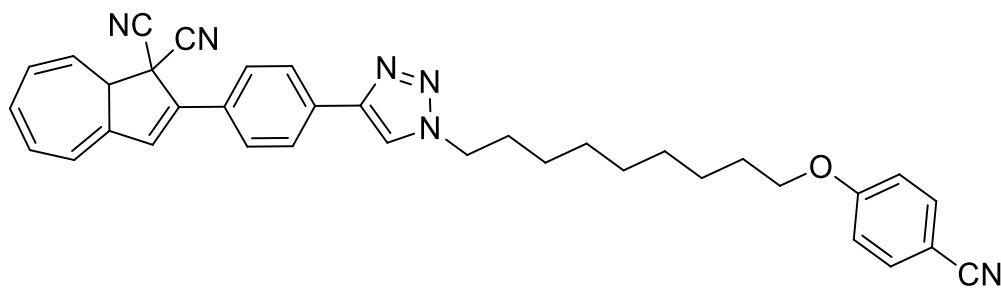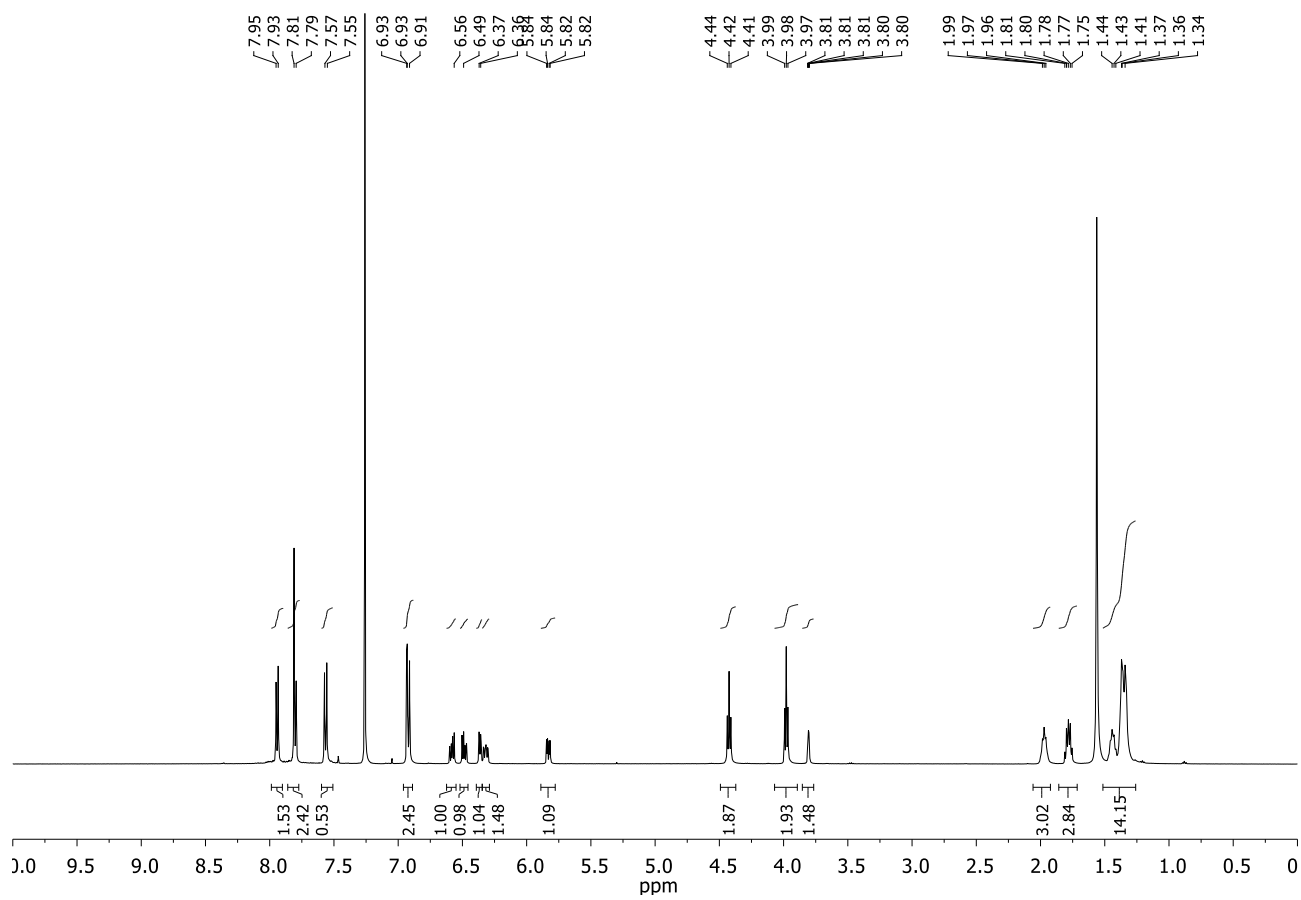



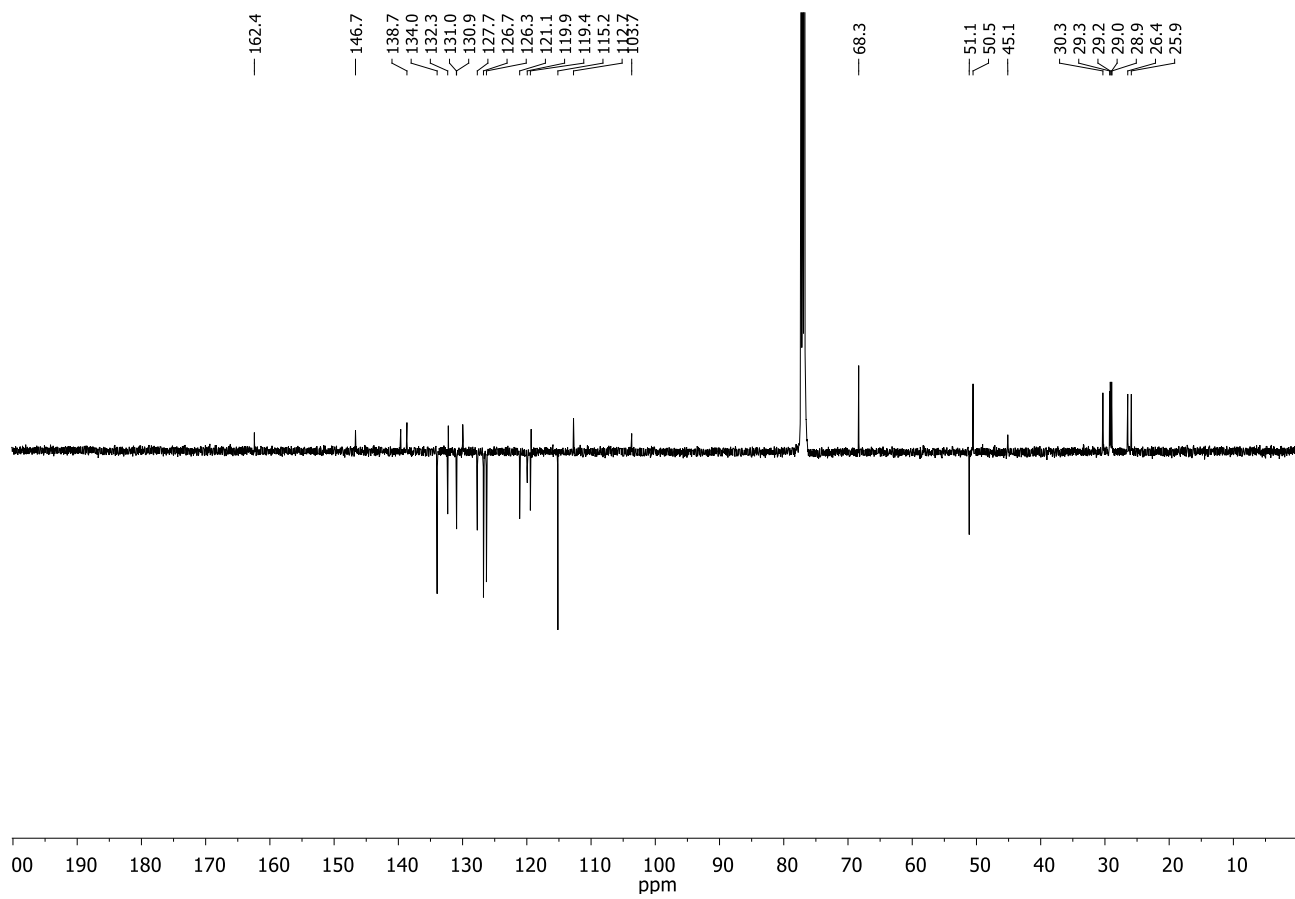

# Compound 4e

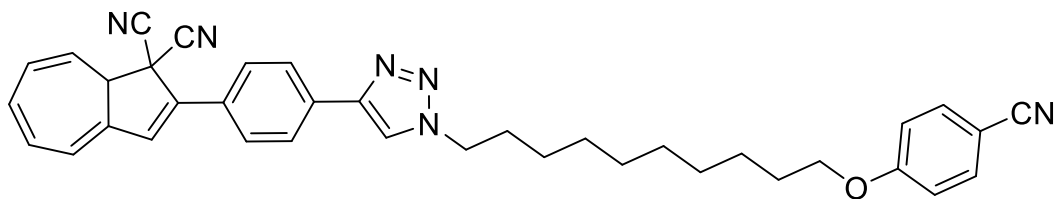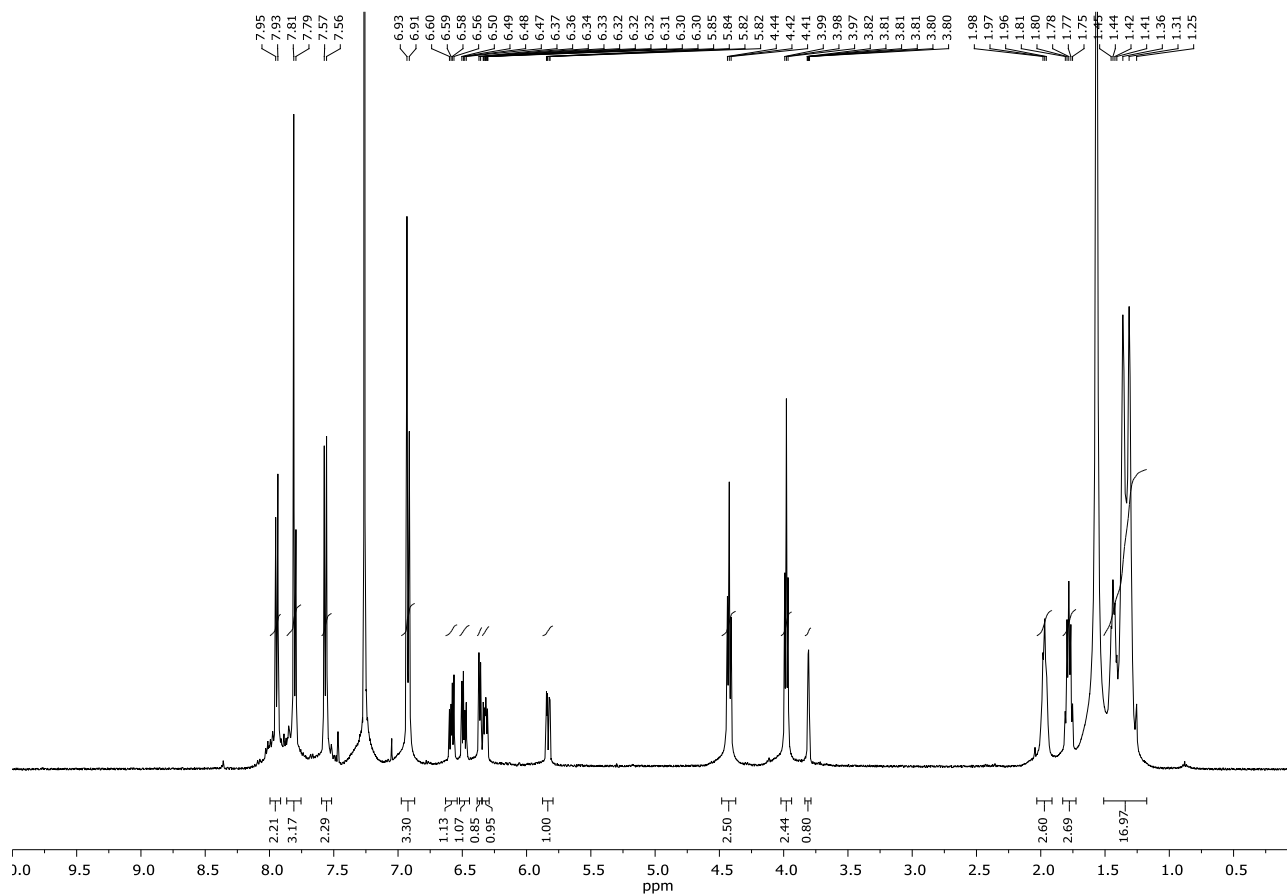

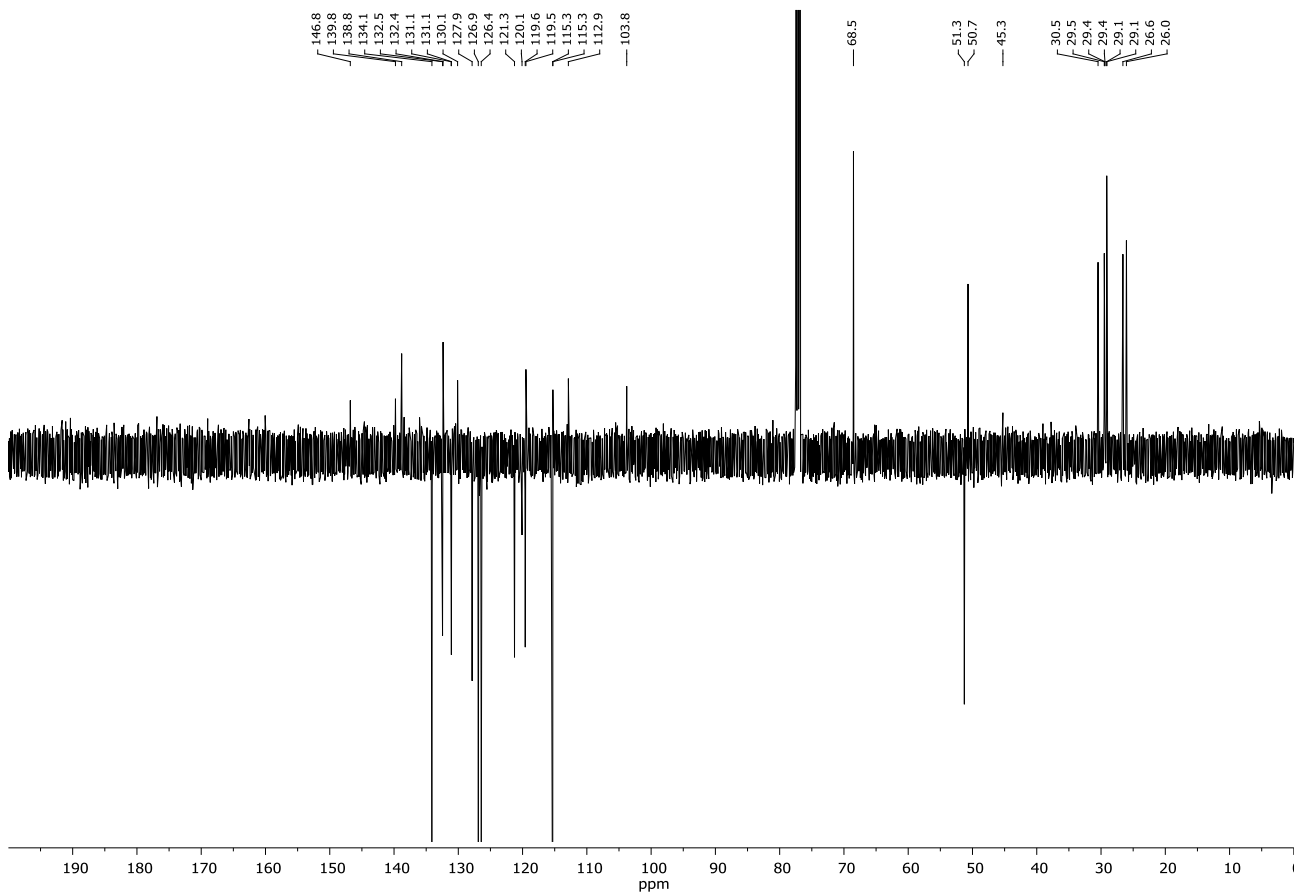

# Compound 4J

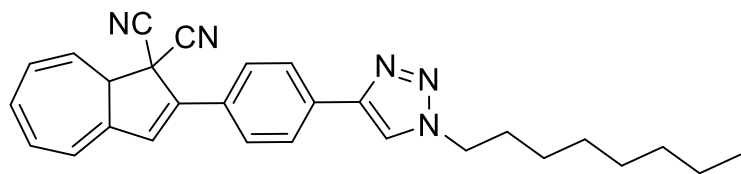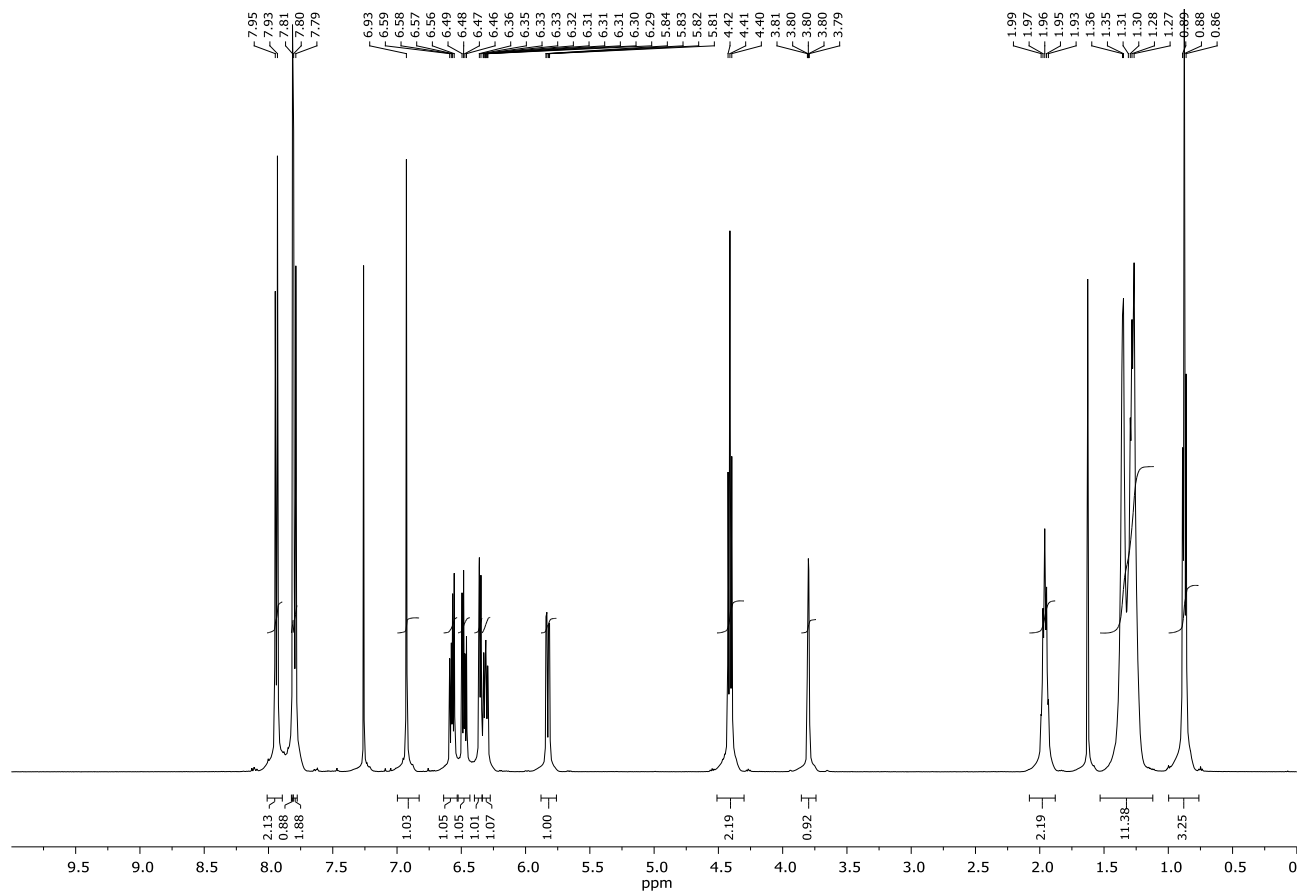

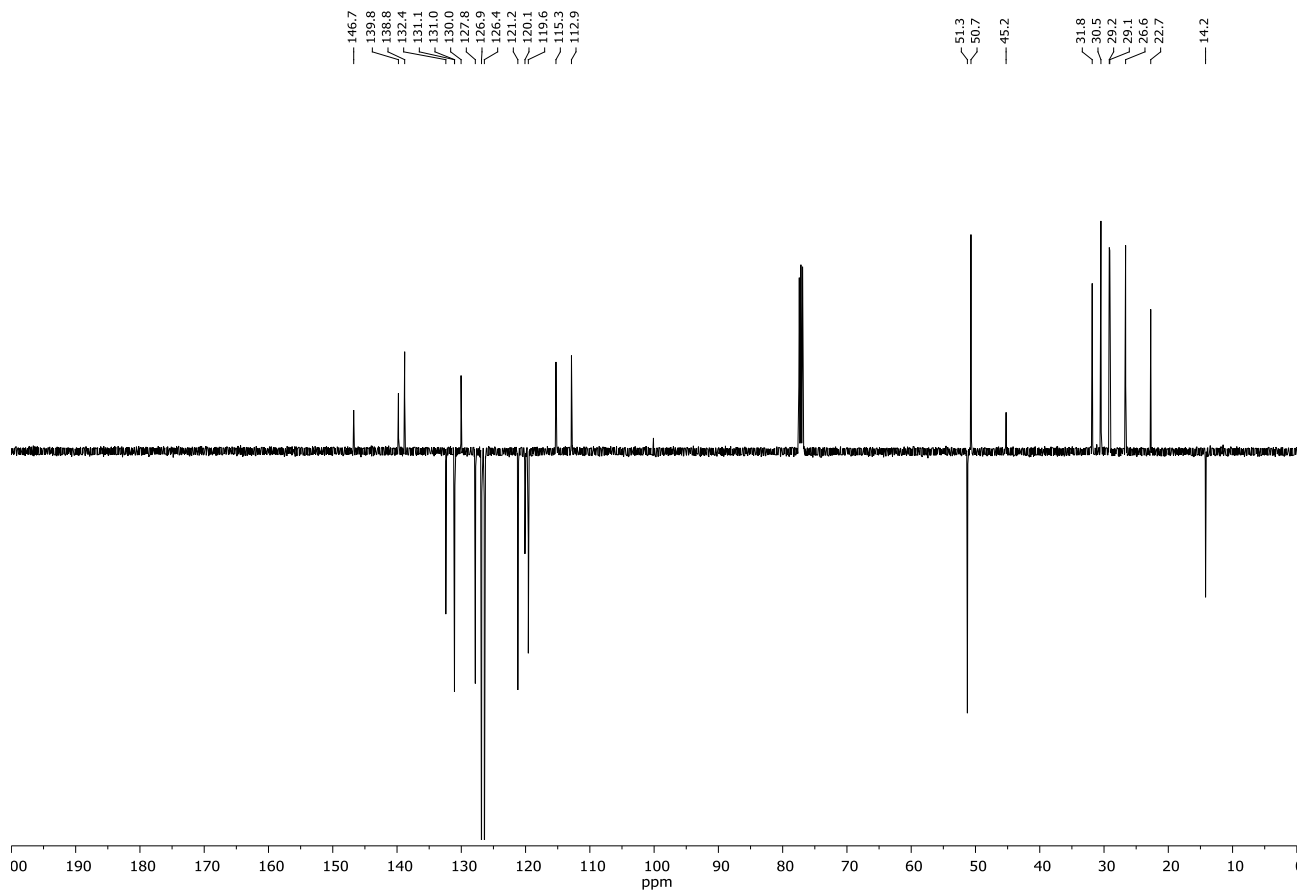

# Compound 17

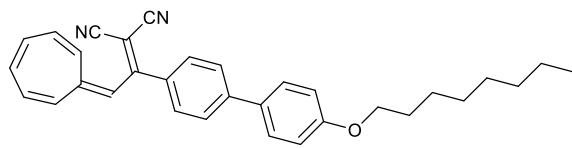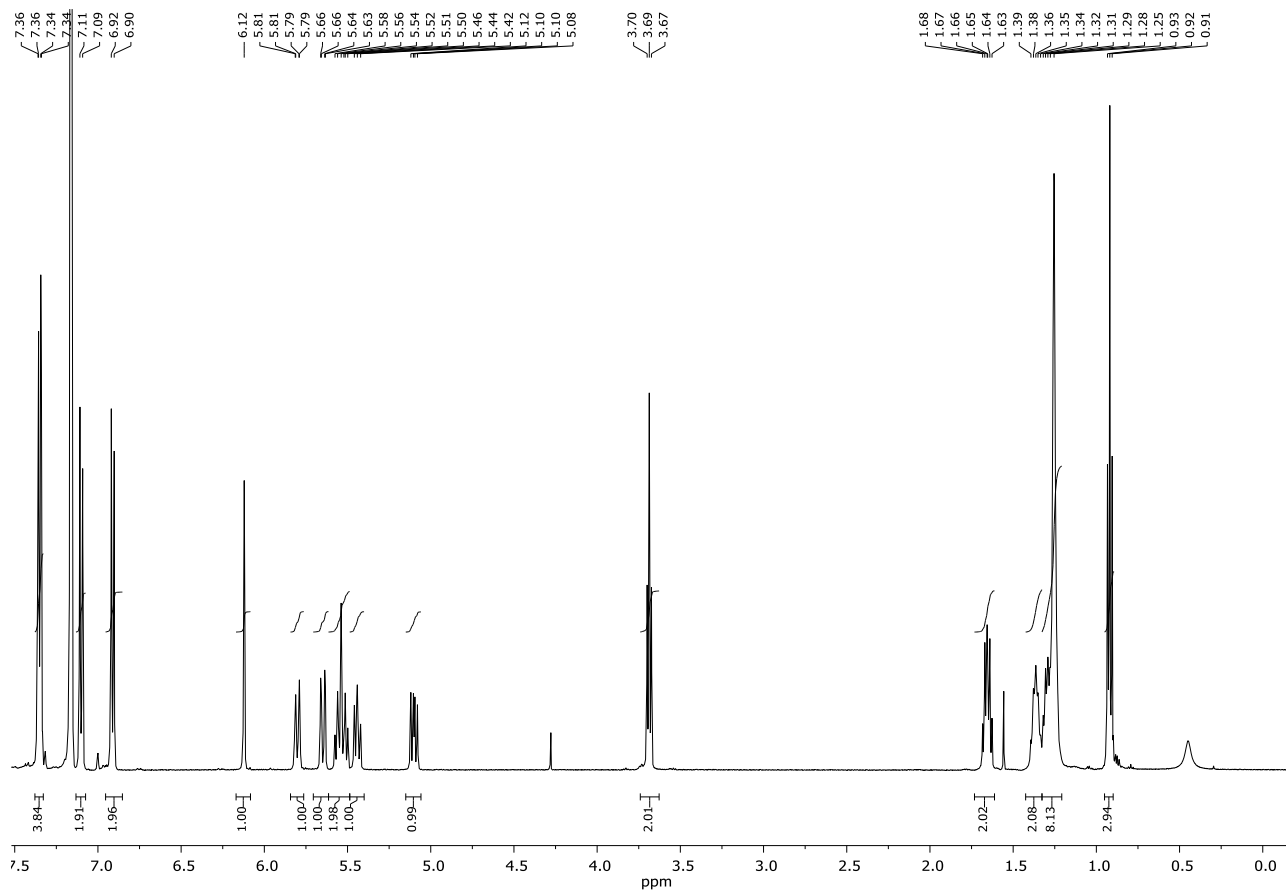

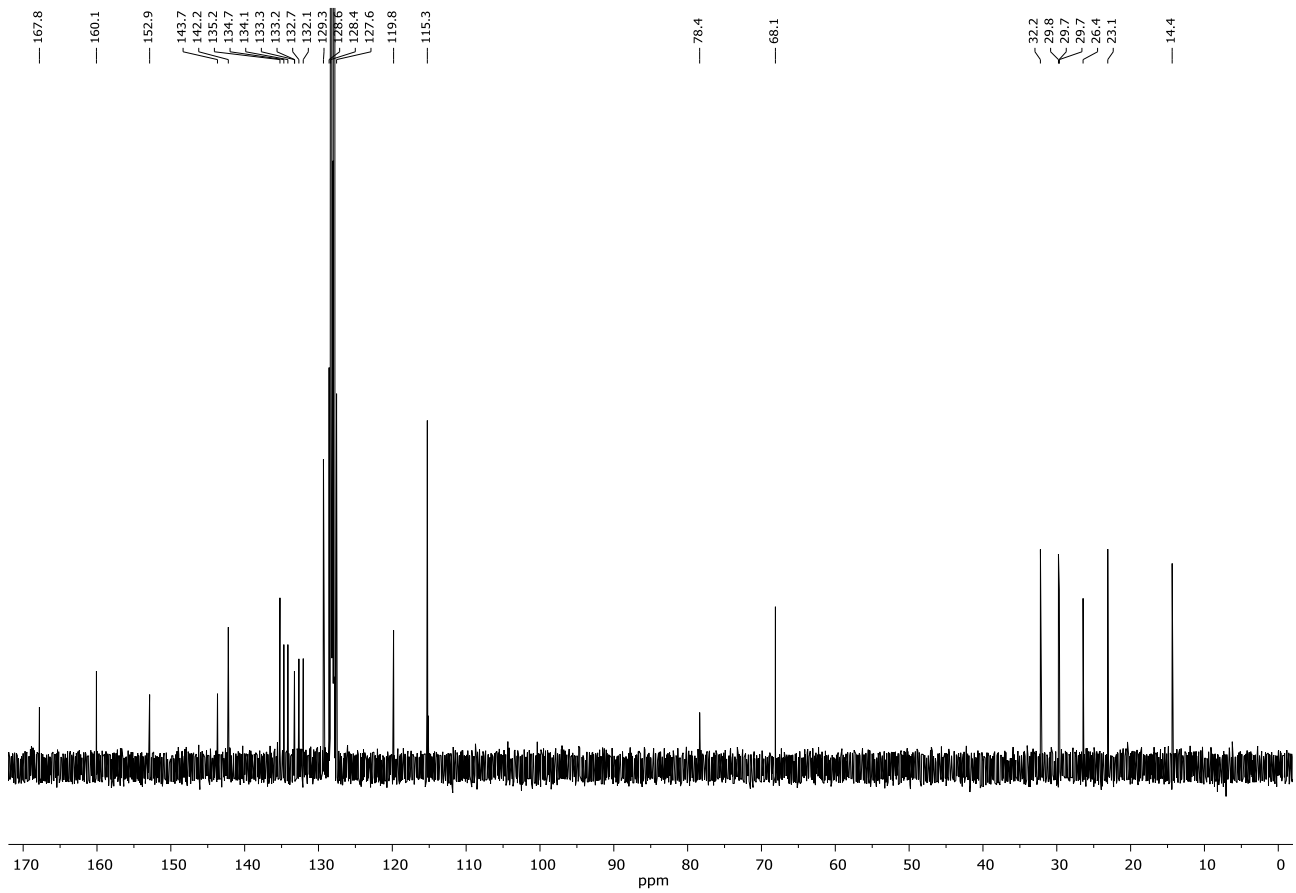

# Compound 18

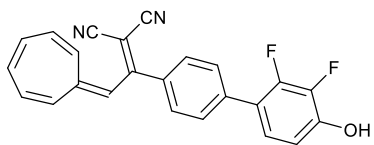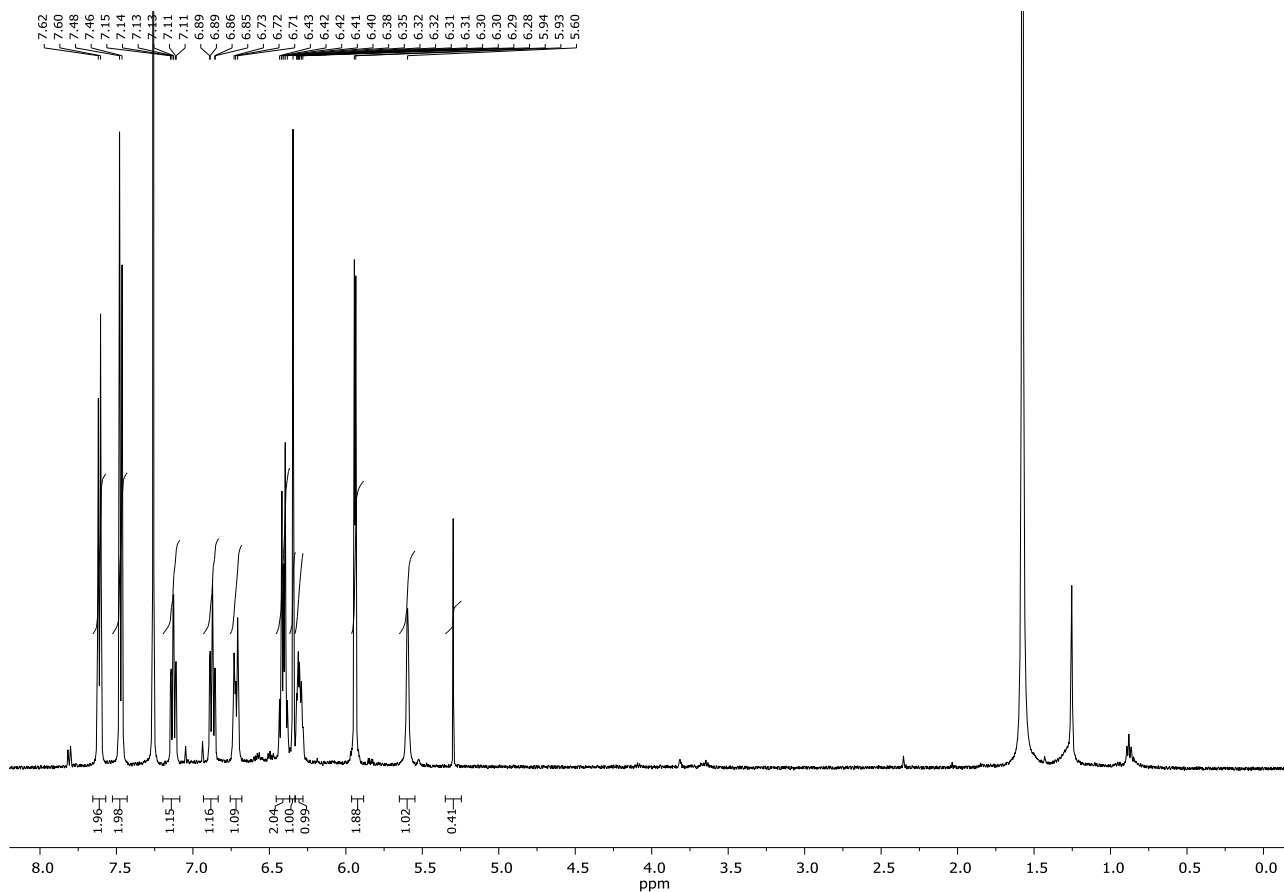



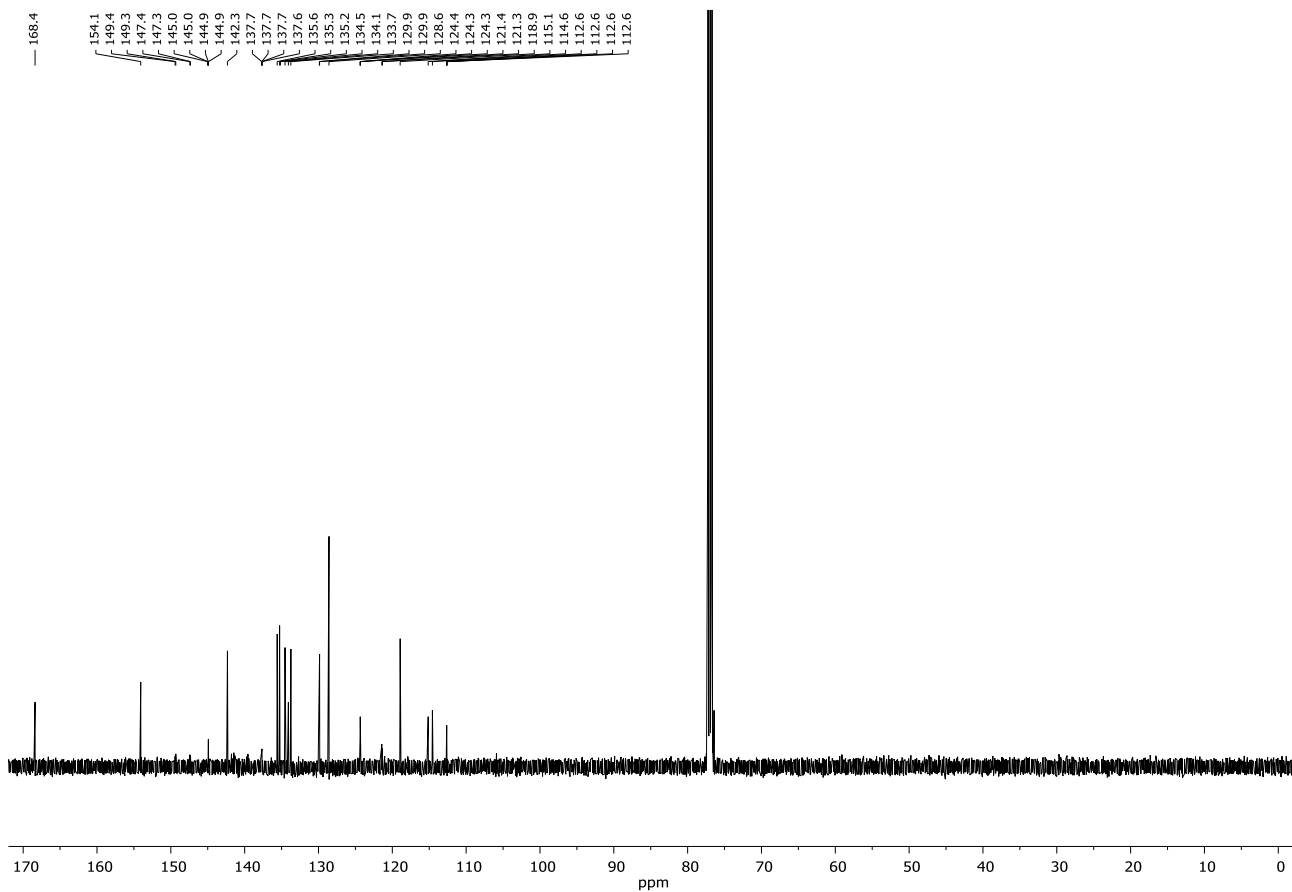

# UV-Vis Absorption Spectra and Decay of VHF Absorbance at $\lambda_{\text{max,VHF}}$ in MeCN at 25°C

## Compound 3a

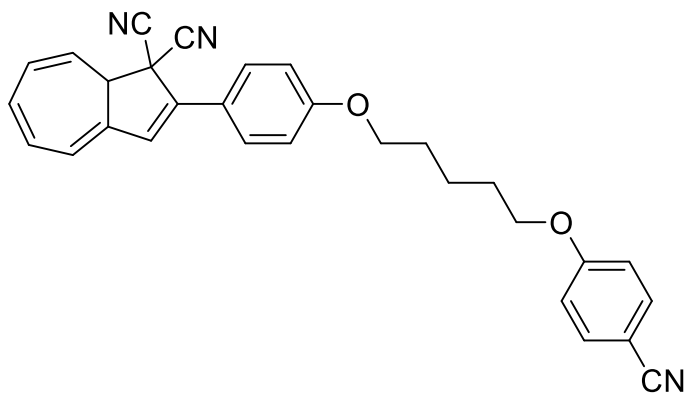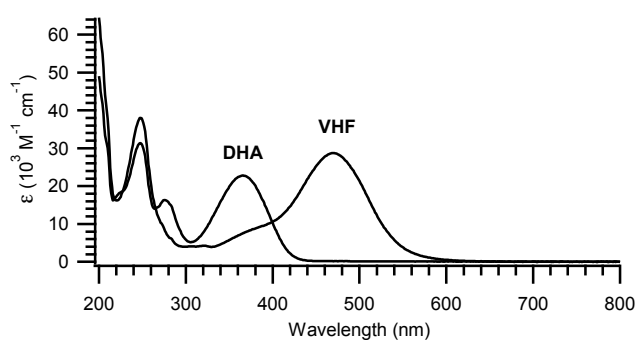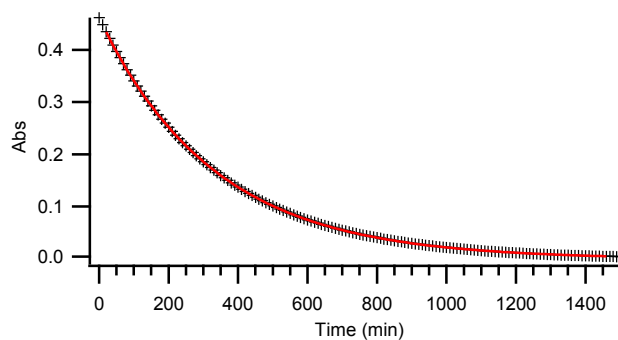

## Compound 3b

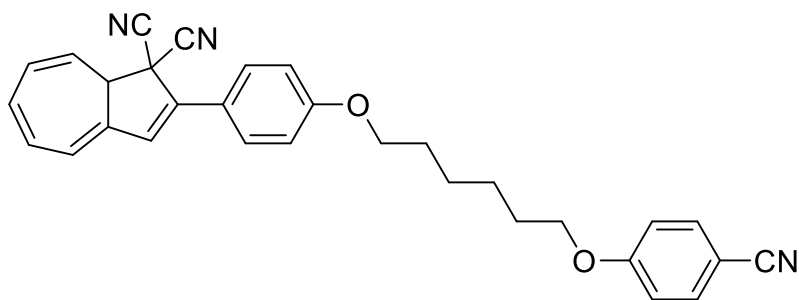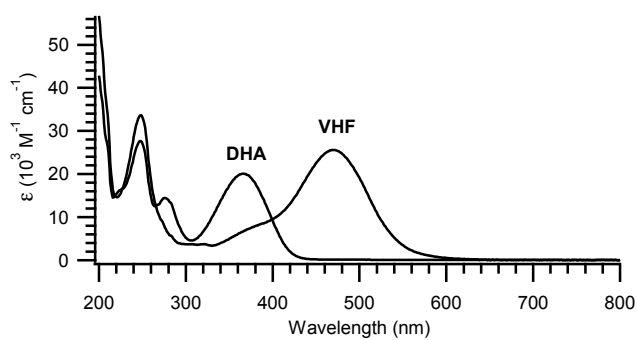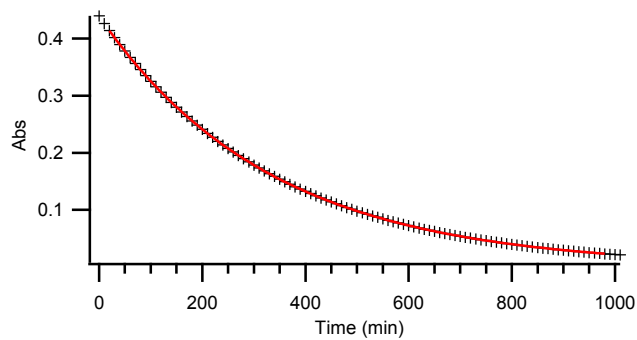

## Compound 3C

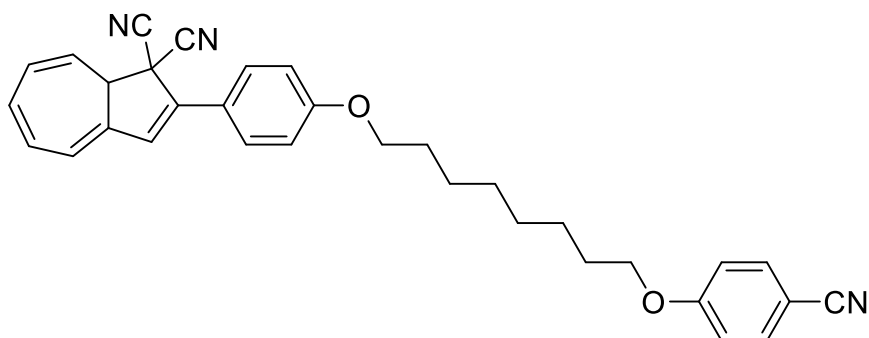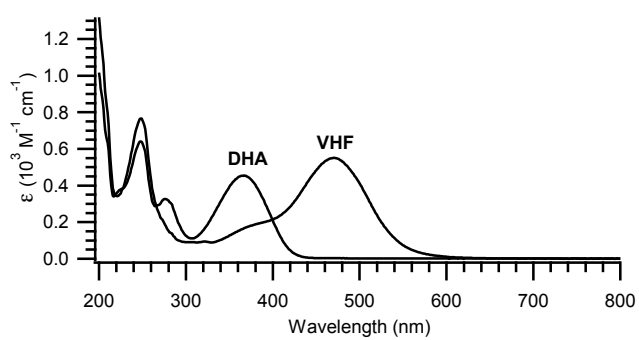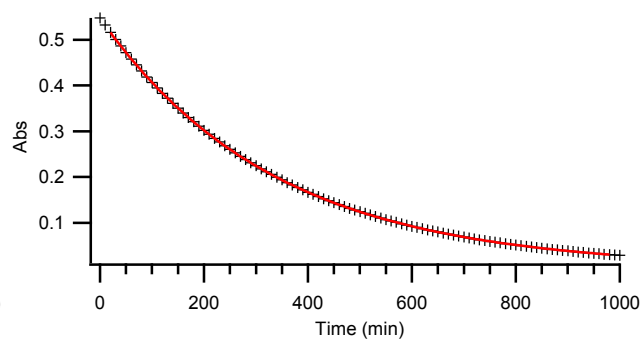

## Compound 3d

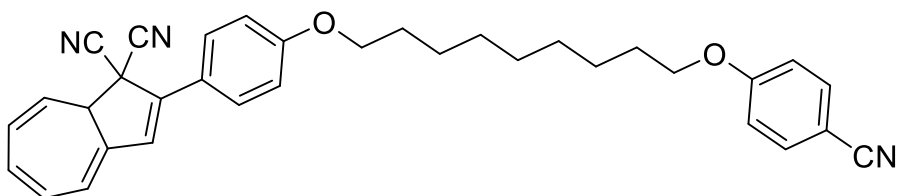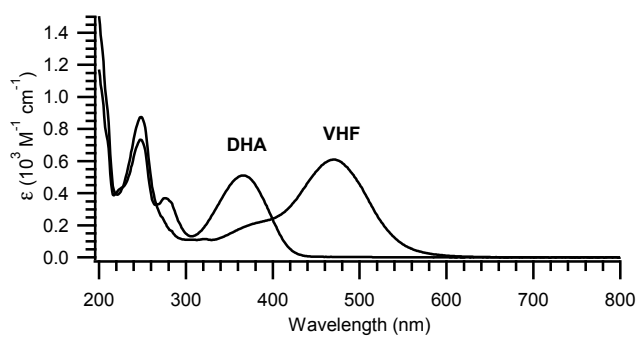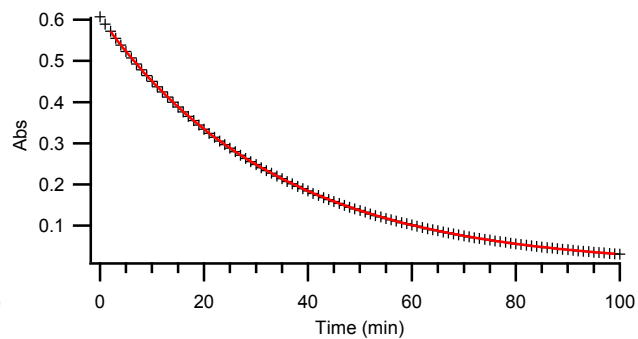

### Compound 3e

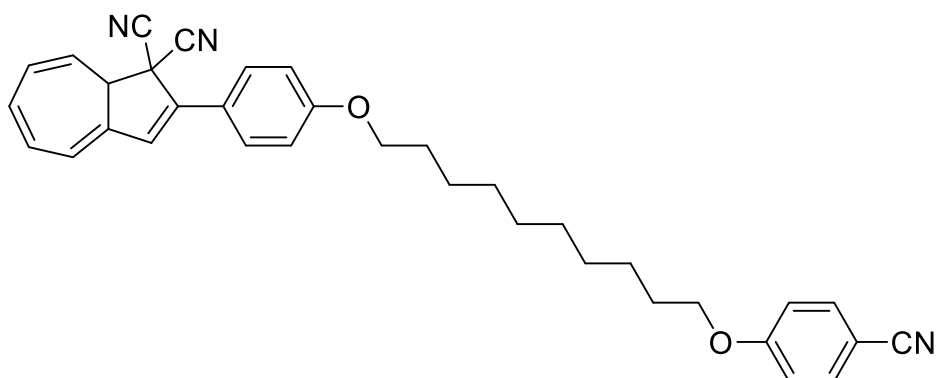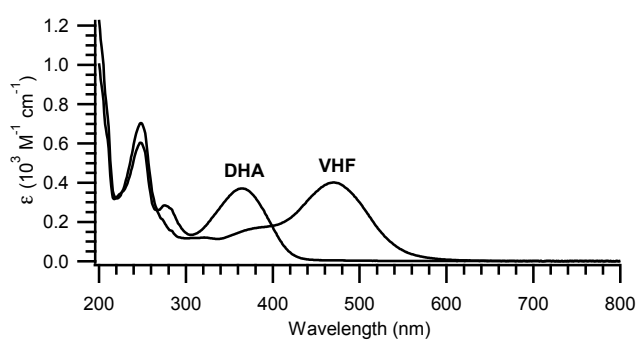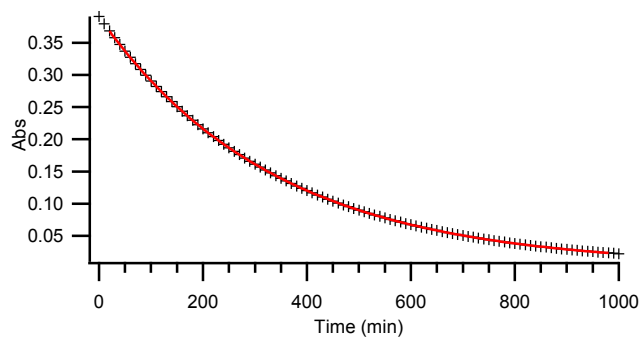

### Compound 3f

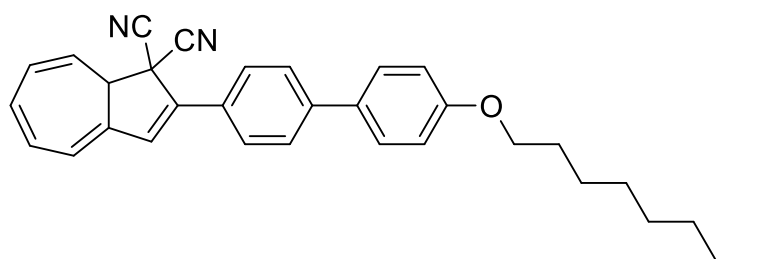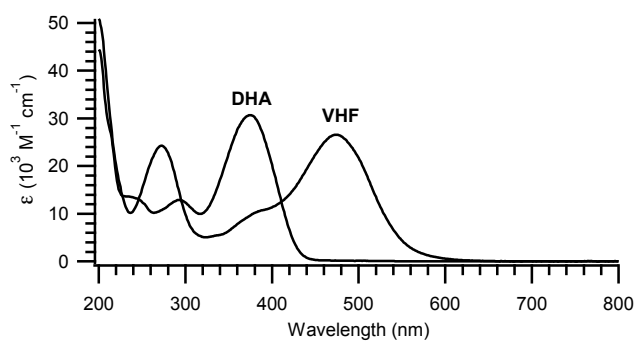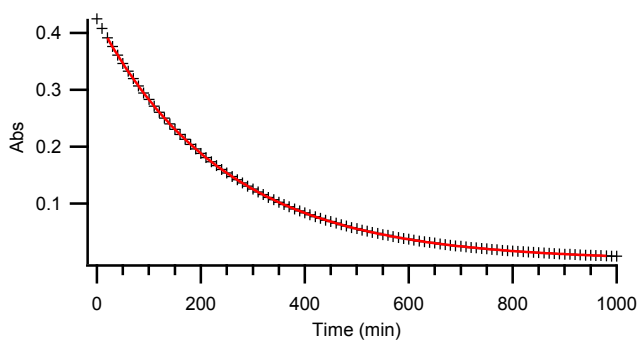

### Compound 3g

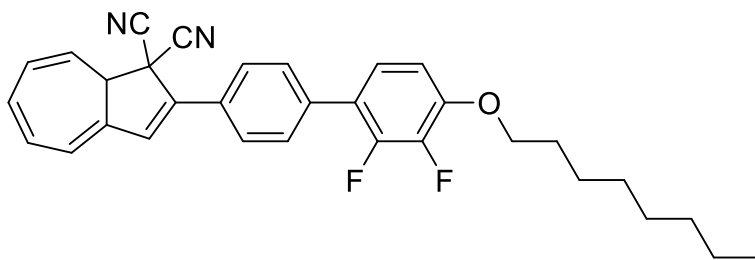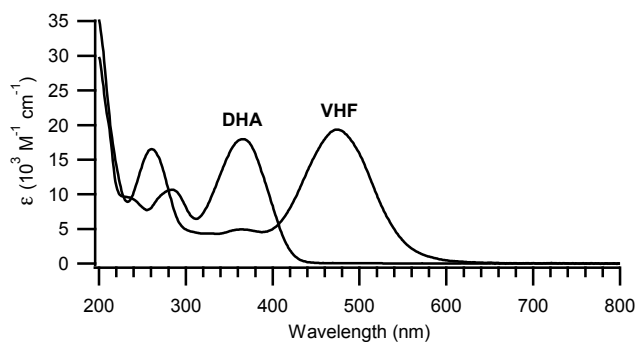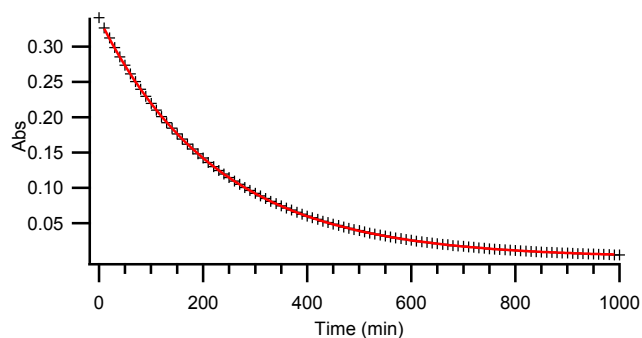

### Compound 3h

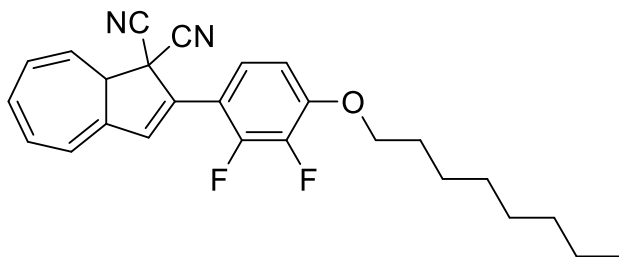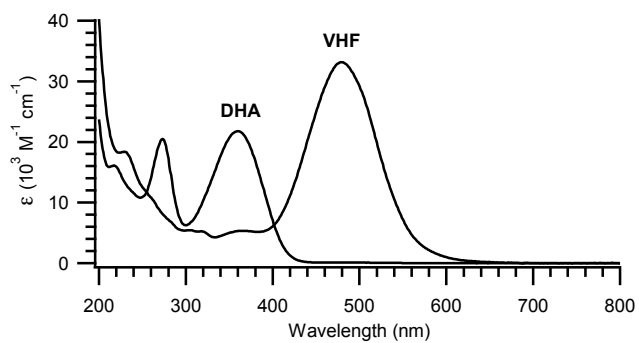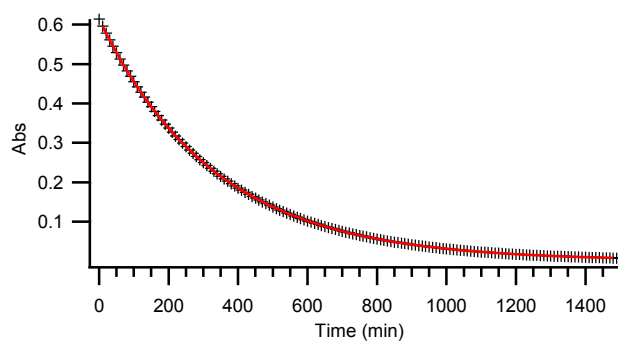

## Compound 3i

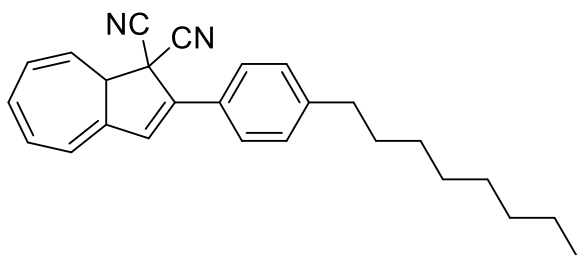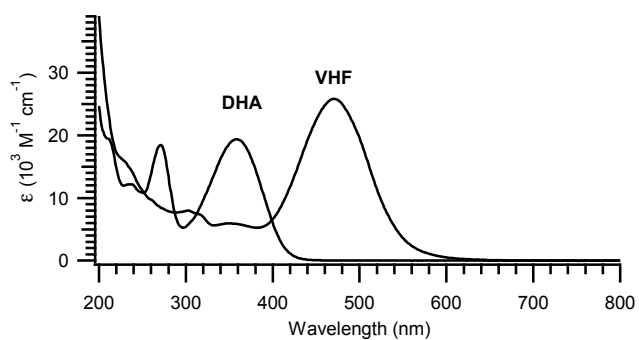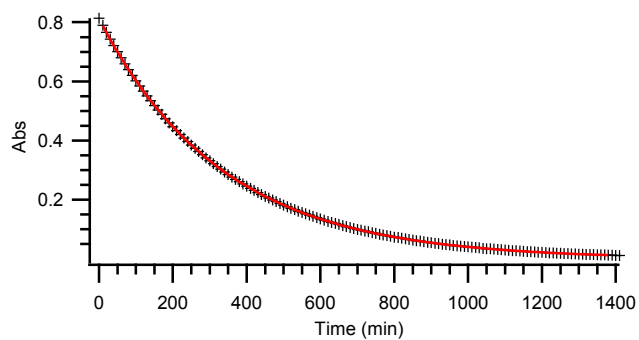

## Compound 4a

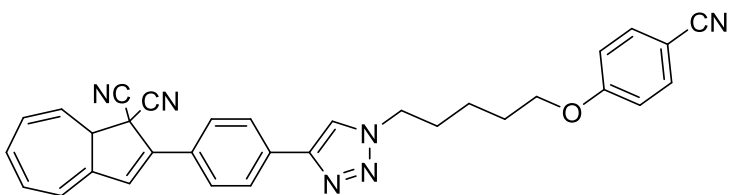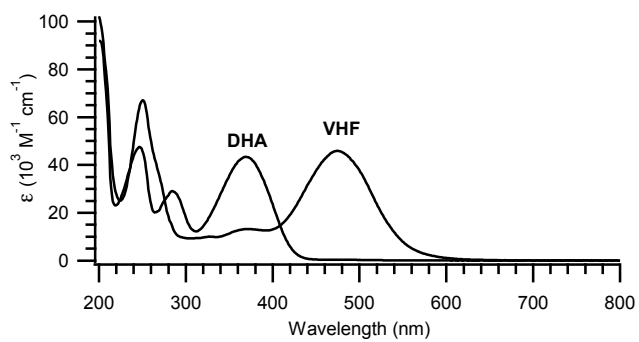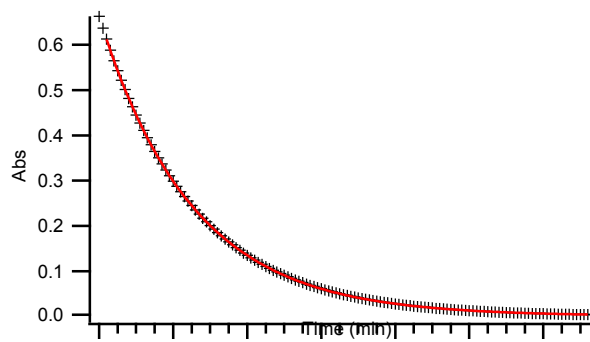

### Compound 4b

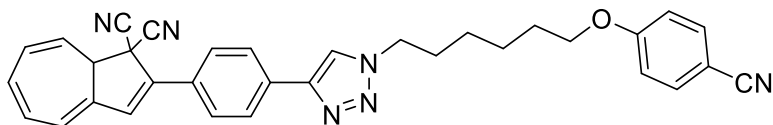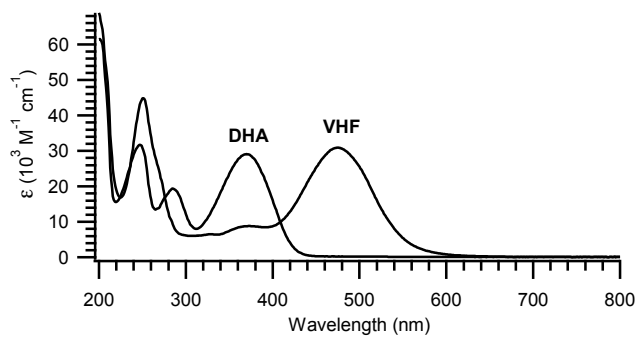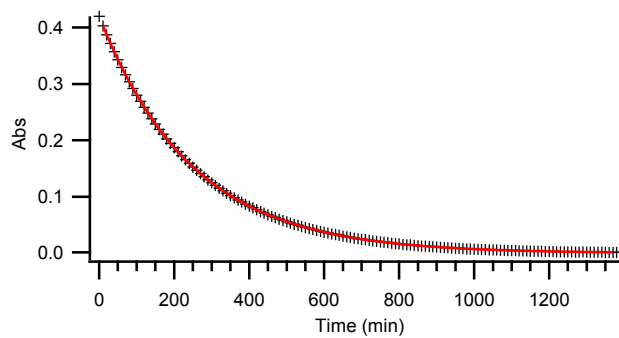

### Compound 4c

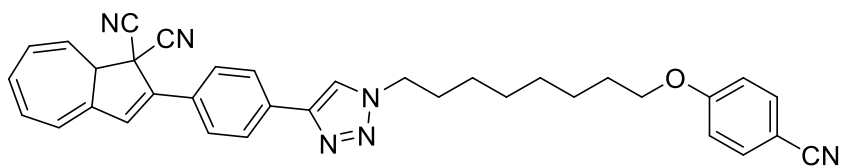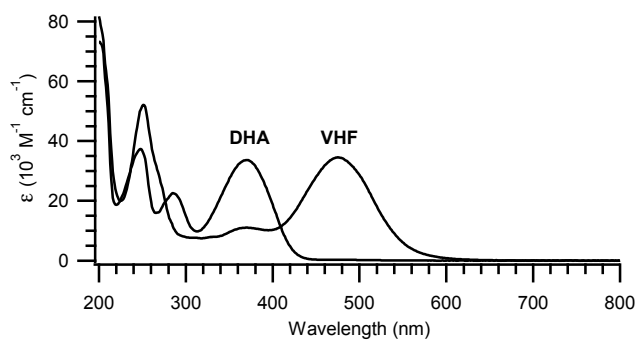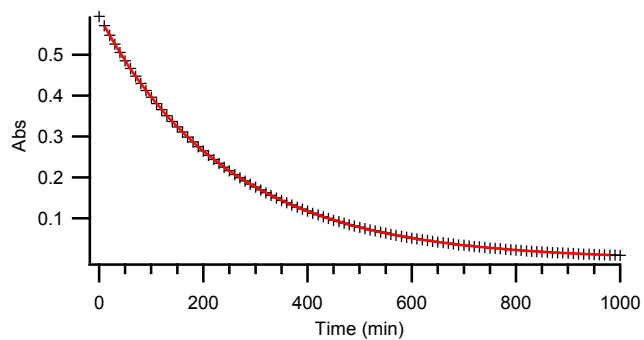

## Compound 4d

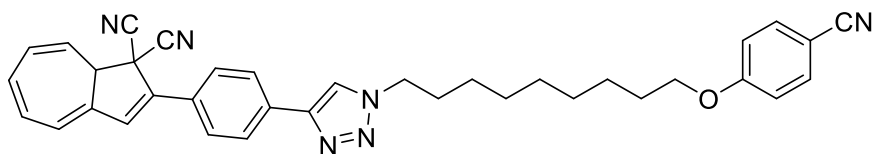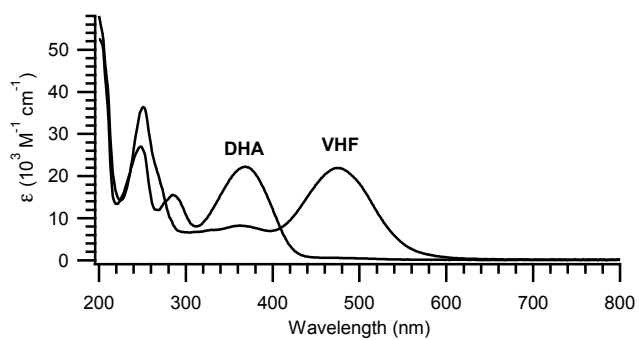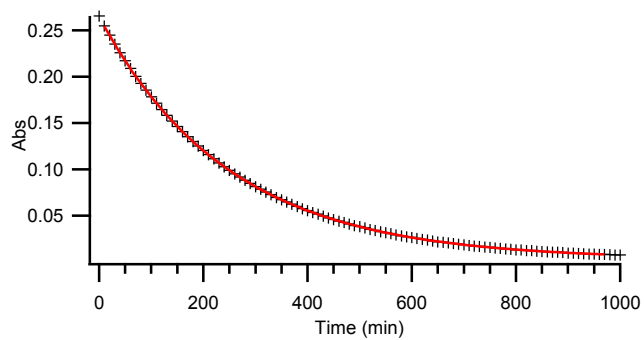

## Compound 4e

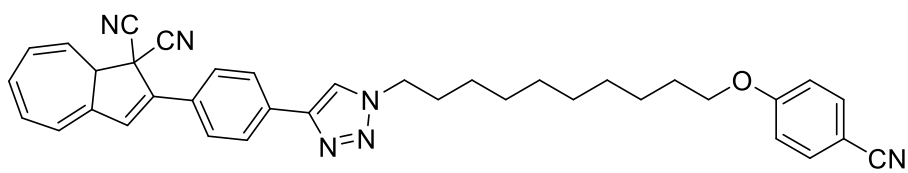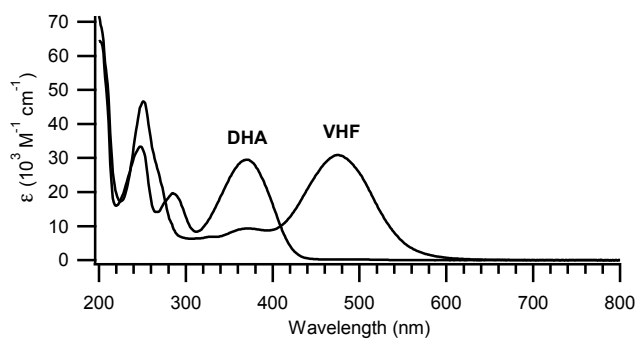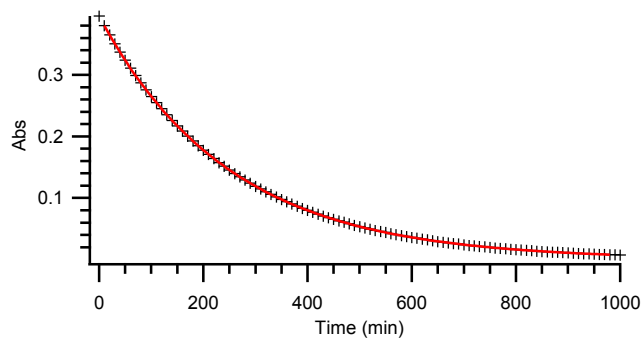



## Compound 4j

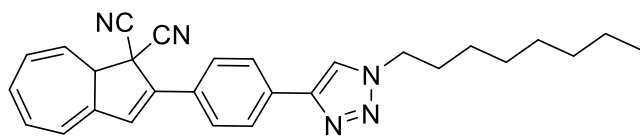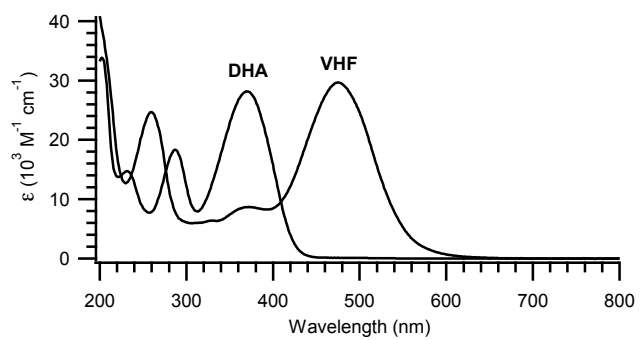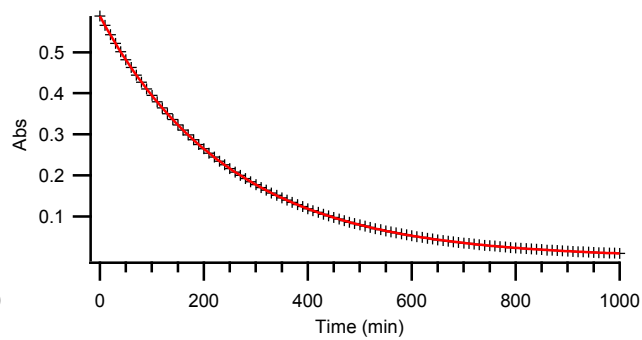

## DSC Thermograms

### Compound 9f

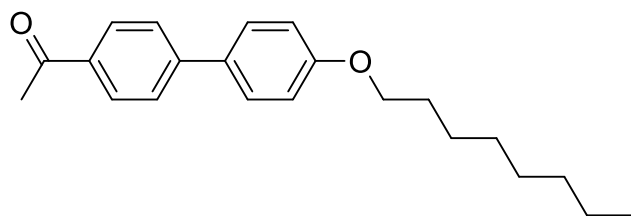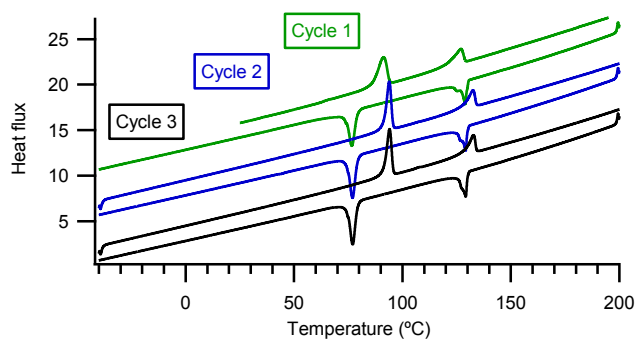

### Compound 9g

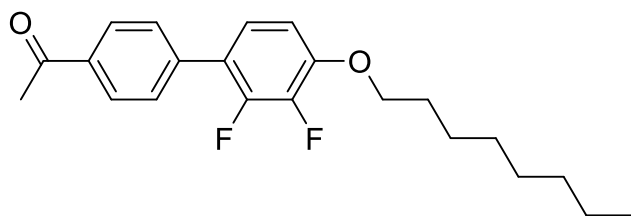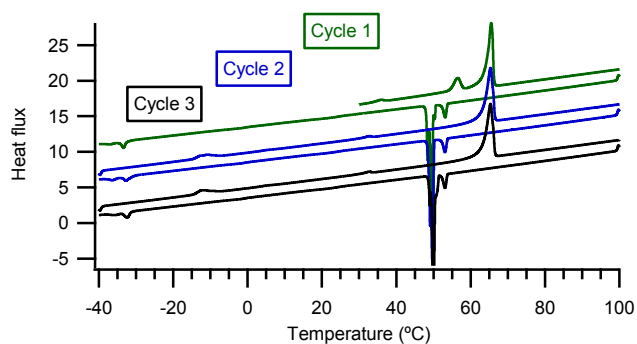

### Compound 3f

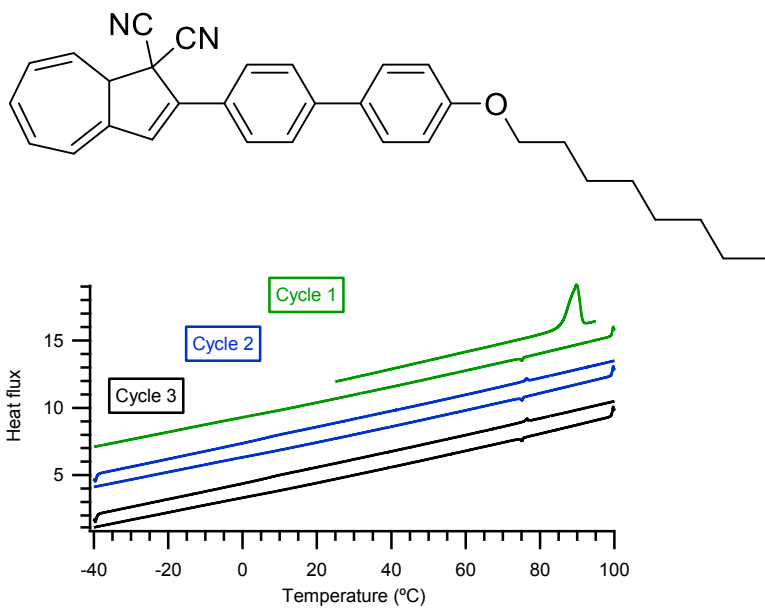

### Compound 3g

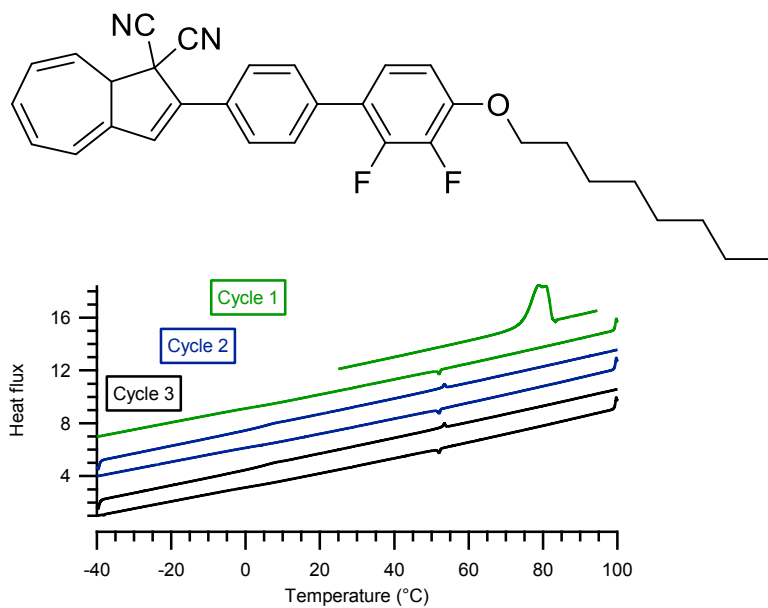

## Conversion of **3g** to the corresponding VHF in the nematic phase

### – NMR Characterization

Compound **3g** (spectrum a) was heated to over the melt and allowed to cool back to 40 °C, where **3g** in the nematic phase was exposed to UV irradiation at 365 nm (TLC lamp) for 1 hour, after which time, the sample was dissolved in C<sub>6</sub>D<sub>6</sub> (spectrum b) and checked for VHF content. This solvent was chosen in order to retard the back reaction. In addition **3g** was treated in the same manner, but instead exposed to the TLC lamp for 24 hours (spectrum c).

a) Pure **3g** in CDCl<sub>3</sub>

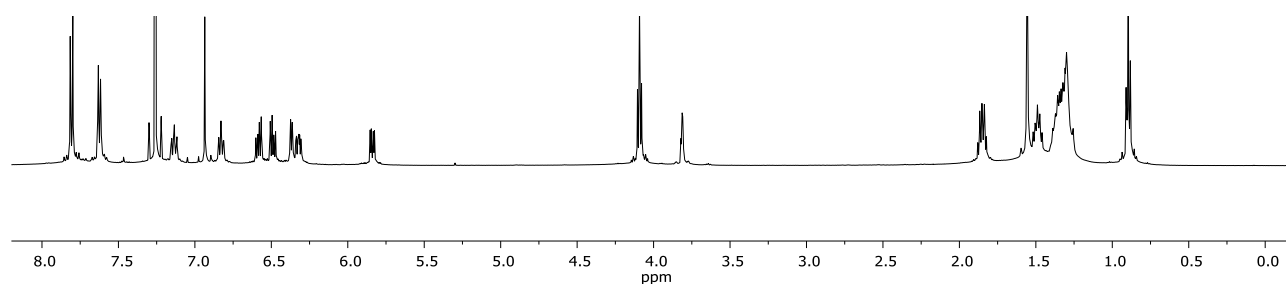

b) **3g** irradiated at 40 °C in the nematic phase for 1h

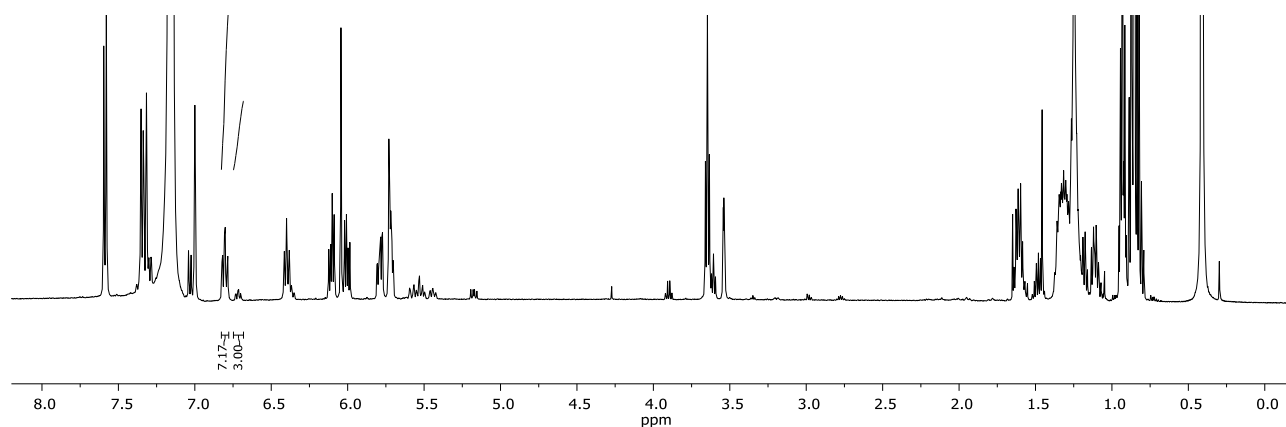

c) **3g** irradiated at 40 °C in the nematic phase for 24h

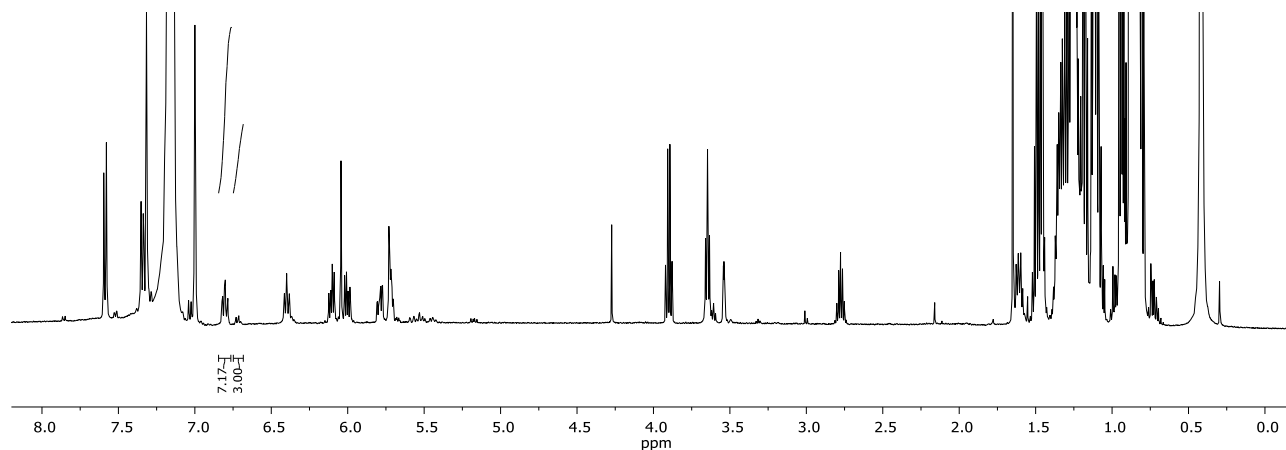

Supplement: c5ra18649h1.pdf [file c5ra18649h1.pdf]
